# Supplementary material for: MATEO: intermolecular α-amidoalkylation theoretical enantioselectivity optimization. Online tool for selection and design of chiral catalysts and products
Source: Springer Nature journal article supplement (doi:10.1186/s13321-024-00802-7), 2024-01-22
Supplement: 13321_2024_802_MOESM1_ESM.pdf [file 13321_2024_802_MOESM1_ESM.pdf]

## Table of Contents:

|                                                                                          |     |
|------------------------------------------------------------------------------------------|-----|
| 1. General experimental methods .....                                                    | S2  |
| 2. Synthesis of racemic <b>2e</b> .....                                                  | S2  |
| 3. Synthesis of enantioenriched isoindolo[1,2- <i>a</i> ]isoquinolines <b>2a-d</b> ..... | S3  |
| 4. HPLC chromatograms of racemic and selected enantioenriched <b>2a-e</b> . .....        | S5  |
| 5. Copies of <sup>1</sup> H and <sup>13</sup> C NMR spectra .....                        | S8  |
| 6. General reaction equations for the reference reactions in the database.....           | S13 |
| 7. Molecule codes .....                                                                  | S17 |

## 1. General experimental methods.

Melting points were determined in unsealed capillary tubes. IR spectra were obtained in film over NaCl pellets. NMR spectra were recorded at 20-25 °C, at 300 MHz for <sup>1</sup>H and 75.5 MHz for <sup>13</sup>C in CDCl<sub>3</sub> solutions, unless otherwise stated. Assignments of individual <sup>13</sup>C and <sup>1</sup>H resonances are supported by DEPT experiments and 2D correlation experiments (COSY, HSQCed or HMBC). Mass spectra were recorded under under chemical ionization (CI) at 230 eV. Exact mass was obtained using a TOF detector. TLC was carried out with 0.2 mm thick silica gel plates. Visualization was accomplished by UV light. Flash column chromatography was performed on silica gel (230-400 mesh) or on alumina (70-230 mesh). Chiral stationary phase HPLC was performed using a Chiralcel OD column (0.46 cm × 25 cm). Optical rotation was measured at 20 °C with a sodium lamp at 589 nm and a path length of 1 dm. All solvents used in reactions were anhydrous and purified according to standard procedures. All air- or moisture-sensitive reactions were performed under argon; the glassware was dried (130 °C) and purged with argon. Racemic samples of **2a-d** were prepared according the procedure previously described.<sup>1</sup> A racemic sample of **2e** was prepared by the same procedure (see below). Phosphoramides **4a-d** were prepared according to literature procedures.<sup>2</sup> Phosphoric acid **5e** was used from commercial source (Aldrich, 98%).

## 2. Synthesis of racemic 2,3-dimethoxy-12b-(1*H*-pyrrol-2-yl)-5,12b-dihydroisoindolo[1,2-*a*]isoquinolin-8(6*H*)-one (**2e**).

TiCl<sub>4</sub> (0.14 mL, 1.4 mmol) was added dropwise to a solution of 12b-hydroxyisoindoloisoquinolone **1**<sup>3</sup> (160 mg, 0.52 mmol) and pyrrole **3e** (0.03 mL, 0.52 mmol) in dry CH<sub>2</sub>Cl<sub>2</sub> (10 mL) at -78 °C. After 2 h stirring, NH<sub>4</sub>Cl (saturated aqueous solution, 2 mL) was added, and the reaction mixture was allowed to warm up to room temperature. The organic layer was separated and the aqueous phase was extracted with CH<sub>2</sub>Cl<sub>2</sub> (3 × 15 mL). The combined organic extracts were dried (Na<sub>2</sub>SO<sub>4</sub>) and concentrated *in vacuo*. The

---

<sup>1</sup> Aranzamendi, E.; Sotomayor, N.; Lete, E. Bronsted acid catalyzed enantioselective alpha-amidoalkylation in the synthesis of isoindoloisoquinolines. *J. Org. Chem.* **2012**, *77*, 2986-91.

<sup>2</sup> Nakashima, D.; Yamamoto, H. Design of chiral *N*-triflyl phosphoramidate as a strong chiral Bronsted acid and its application to asymmetric Diels-Alder reaction. *J. Am. Chem. Soc.* **2006**, *128*, 9626-7.

<sup>3</sup> Collado, M. I.; Manteca, I.; Sotomayor, N.; Villa, M. J.; Lete, E. Metalation vs Nucleophilic Addition in the Reactions of *N*-Phenethylimides with Organolithium Reagents. Ready Access to Isoquinoline Derivatives *via N*-Acyliminium Ions and Parham-Type Cyclizations. *J. Org. Chem.* **1997**, *62*, 2080-92.

crude mixture was purified by column chromatography (silica gel, hexane/ethyl acetate, 6:4) to obtain isoindoloisoquinoline **2e** (138 mg, 76%).

### 3. Synthesis of enantioenriched isoindolo[1,2-*a*]isoquinolines **2a-d**.

**(R)-12b-(1H-indol-3-yl)-2,3-dimethoxy-5,6-dihydroisoindolo[1,2-*a*]isoquinolin-8(12bH)-one (2a) (Table 8, entry 1).** According to the Typical Procedure, **1** (62 mg, 0.20 mmol) was treated with indole **3a** (24 mg, 0.20 mmol) and **4a** (29.2 mg, 0.04 mmol, 20 mol %) in dry THF (5 mL) for 24h at rt, to afford isoindolo[1,2-*a*]isoquinoline **2a** (71 mg, 90 %), whose spectroscopic data are coincidental to those reported.<sup>1</sup> The enantiomeric excess was determined by HPLC to be 93% [Chiralcel OD, 15 % hexane : 2-propanol, 1 mL/min,  $t_r$  (S)= 26.32 min (3.48 %),  $t_r$  (R)= 30.23 min (96.52 %)]. <sup>1</sup>H NMR (300 MHz, CDCl<sub>3</sub>):  $\delta$  2.72-2.77 (m, 1H), 3.14-3.22 (m, 2H), 3.85 (s, 3H), 3.88 (s, 3H), 4.37-4.41 (m, 1H), 6.40 (d,  $J$  = 8.1 Hz, 1H), 6.67 (s, 1H), 6.75 (d,  $J$  = 2.6 Hz, 1H), 6.79 (t,  $J$  = 7.6 Hz, 1H), 7.08 (t,  $J$  = 7.3 Hz, 1H), 7.25 (s, 1H), 7.31 (d,  $J$  = 8.2 Hz, 1H), 7.51-7.54 (m, 2H), 7.64-7.67 (m, 1H), 7.97-8.01 (m, 1H), 8.31 (broad s, 1H) ppm; <sup>13</sup>C{<sup>1</sup>H} NMR (75.5 MHz, CDCl<sub>3</sub>):  $\delta$  29.7, 34.9, 55.9, 56.2, 66.1, 110.9, 111.2, 111.8, 117.7, 119.8, 120.0, 122.4, 123.9, 124.0, 124.9, 126.5, 127.3, 128.6, 129.5, 131.88, 132.0, 136.9, 147.0, 148.5, 149.8, 167.2 ppm.

**(R)-2,3-dimethoxy-12b-(5-nitro-1H-indol-3-yl)-5,6-dihydroisoindolo[1,2-*a*]isoquinolin-8(12bH)-one (2b) (Table 8, entry 5).** According to the Typical Procedure, **1** (62 mg, 0.20 mmol) was treated with indole **3b** (32 mg, 0.20 mmol) and **4a** (29.2 mg, 0.04 mmol, 20 mol %) in dry THF (5 mL) for 24h at rt to afford isoindolo[1,2-*a*]isoquinoline **2b** (83 mg, 94%), whose spectroscopic data are coincidental to those reported.<sup>1</sup> The enantiomeric excess was determined by HPLC to be 11% [Chiralcel OD, 15 % hexane : 2-propanol, 1 mL/min,  $t_r$  (S)= 44.46 min (44.37 %),  $t_r$  (R)= 57.18 min (55.63 %)]. <sup>1</sup>H NMR (300 MHz, CDCl<sub>3</sub>):  $\delta$  2.76-2.78 (m, 1H), 3.13-3.22 (m, 2H), 3.85 (s, 3H), 3.89 (s, 3H), 4.43-4.46 (m, 1H), 6.59 (s, 1H), 6.93 (d,  $J$  = 2.0 Hz, 1H), 7.22 (s, 1H), 7.25 (d,  $J$  = 2.0 Hz, 1H), 7.35 (d,  $J$  = 9 Hz, 1H), 7.56-7.65 (m, 2H), 7.71-7.72 (m, 1H), 8.01 (d,  $J$  = 9.0 Hz, 1H), 8.10-8.04 (m, 1H), 8.9 (broad s, 1H) ppm; <sup>13</sup>C{<sup>1</sup>H} NMR (75.5 MHz, DMSO-*d*<sub>6</sub>):  $\delta$  28.6, 34.9, 55.9, 56.4, 65.6, 111.7, 112.7, 113.0, 115.8, 117.2, 118.9, 123.5, 124.1, 125.3, 127.1, 128.8, 129.5, 131.4, 131.7, 133.1, 140.7, 140.8, 147.5, 148.8, 150.0, 166.5 ppm.

**(R)-12b-(5-bromo-1H-indol-3-yl)-2,3-dimethoxy-5,6-dihydroisoindolo[1,2-a]isoquinolin-8(12bH)-one (2c)** (Table 8, entry 6). According to the Typical Procedure, **1** (62 mg, 0.2 mmol) was treated with indole **3c** (39 mg, 0.2 mmol) and **4a** (29.2 mg, 0.04 mmol, 20 mol %) in dry THF (5 mL) for 24h at rt to afford isoindolo[1,2-a]isoquinoline **2b** (94 mg, quant.%), whose spectroscopic data are coincidental to those reported.<sup>1</sup> The enantiomeric excess was determined by HPLC to be 67% [Chiralcel OD, 15 % hexane : 2-propanol, 1 mL/min,  $t_r$  (*S*)= 24.80 min (18.42 %),  $t_r$  (*R*)= 32.92 min (83.58 %)]. <sup>1</sup>H NMR (300 MHz, CDCl<sub>3</sub>):  $\delta$  2.70-2.90 (m, 1H), 3.09-3.24 (m, 2H), 3.84 (s, 3H), 3.87 (s, 3H), 4.34-4.43 (m, 1H), 6.45 (s, 1H), 6.66 (s, 1H), 6.77 (d,  $J$  = 2.5 Hz, 1H), 7.14-7.22 (m, 3H), 7.54-7.57 (m, 2H), 7.62-7.65 (m, 1H), 7.98-8.01 (m, 1H), 8.49 (broad s, 1H) ppm; <sup>13</sup>C{<sup>1</sup>H} NMR (75.5 MHz, CDCl<sub>3</sub>):  $\delta$  28.6, 34.9, 55.97, 56.2, 65.8, 111.6, 111.8, 112.8, 113.4, 117.5, 122.3, 123.9, 124.0, 125.4, 126.5, 127.3, 127.7, 128.9, 129.2, 131.8, 132.1, 135.7, 147.1, 148.6, 149.4, 167.3 ppm.

**(R)-2,3-dimethoxy-12b-(5-methoxy-1H-indol-3-yl)-5,6-dihydroisoindolo[1,2-a]isoquinolin-8(12bH)-one (2d)** (Table 8, entry 7). According to the Typical Procedure, **1** (62 mg, 0.2 mmol) was treated with indole **3d** (29 mg, 0.2 mmol) and **4a** (29.2 mg, 0.04 mmol, 20 mol %) in dry THF (5 mL) for 24h at rt to afford isoindolo[1,2-a]isoquinoline **2b** (85 mg, quant.%), whose spectroscopic data are coincidental to those reported.<sup>1</sup> The enantiomeric excess was determined by HPLC to be 52% [Chiralcel OD, 15 % hexane : 2-propanol, 1 mL/min,  $t_r$  (*S*)= 25.34 min (23.82 %),  $t_r$  (*R*)= 34.11 min (76.18 %)]. <sup>1</sup>H NMR (300 MHz, CDCl<sub>3</sub>):  $\delta$  2.73-2.82 (m, 1H), 3.09-3.28 (m, 2H), 3.41 (s, 3H), 3.84 (s, 3H), 3.87 (s, 3H), 4.38-4.44 (m, 1H), 5.71-5.72 (m, 1H), 6.57 (s, 1H), 6.71-6.74 (m, 2H), 7.18 (d,  $J$  = 8.8 Hz, 1H), 7.26 (s, 1H), 7.50-7.59 (m, 2H), 7.69-7.71 (m, 1H), 7.98-8.01 (m, 1H), 8.32 (broad s, 1H) ppm; <sup>13</sup>C{<sup>1</sup>H} NMR (75.5 MHz, CDCl<sub>3</sub>):  $\delta$  28.9, 35.8, 55.2, 55.9, 56.2, 66.3, 101.1, 110.9, 111.7, 112.1, 112.7, 117.0, 123.7, 124.3, 125.3, 127.2, 127.3, 128.6, 129.5, 131.9, 132.0, 132.2, 147.1, 148.5, 149.9, 153.8, 167.1 ppm.

#### 4. HPLC chromatograms of racemic and selected enantioenriched 2a-e

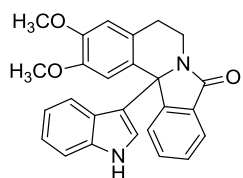

**2a**, racemic mixture

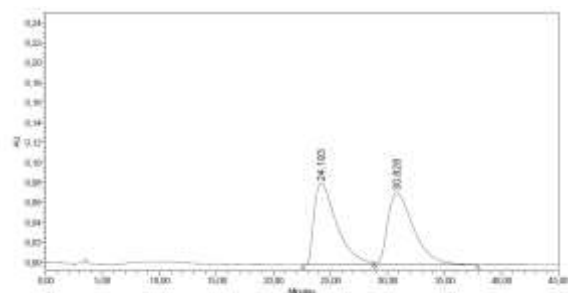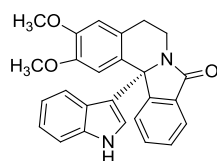

**(R)-2a**, 93 % *ee*,  
Table 8, entry 1

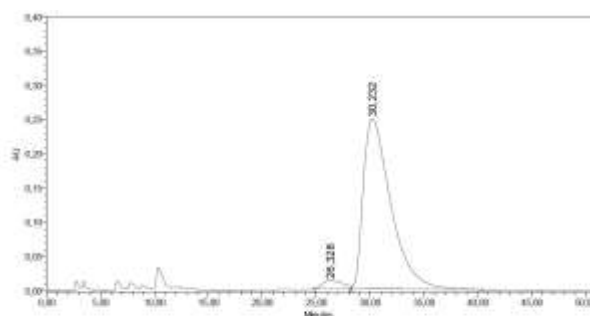

| RT | Area   | % Area   | Height |
|----|--------|----------|--------|
| 1  | 26.328 | 1502410  | 3.48   |
| 2  | 30.232 | 44140254 | 38.52  |

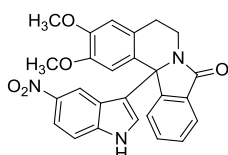

**2b**, racemic mixture

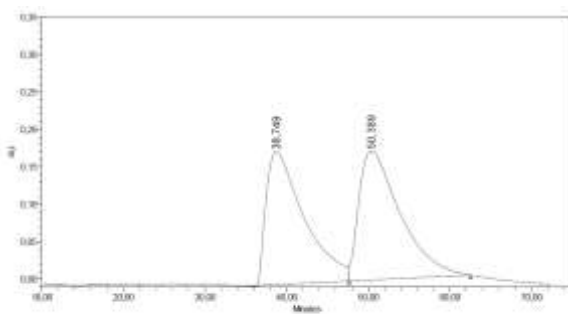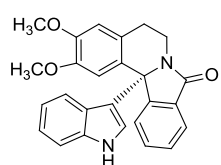

**(R)-2b**, 11 % *ee*,  
Table 8, entry 5

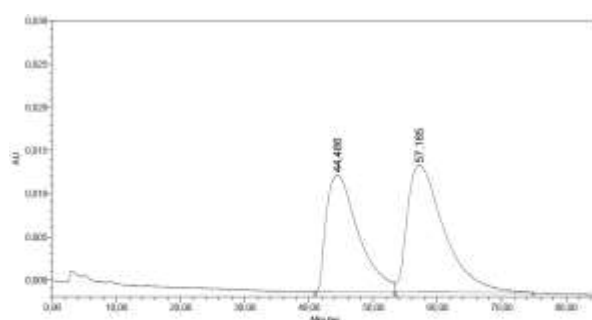

| RT | Area   | % Area  | Height |
|----|--------|---------|--------|
| 1  | 44.286 | 4691623 | 44.37  |
| 2  | 57.185 | 5881437 | 55.85  |

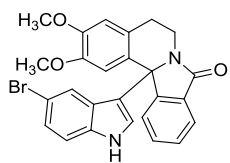

**2c**, racemic mixture

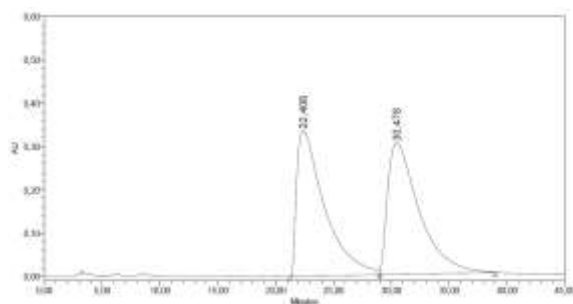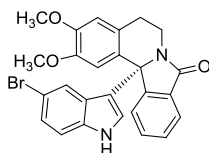

**(R)-2c**, 67% *ee*,

Table 8, entry 6

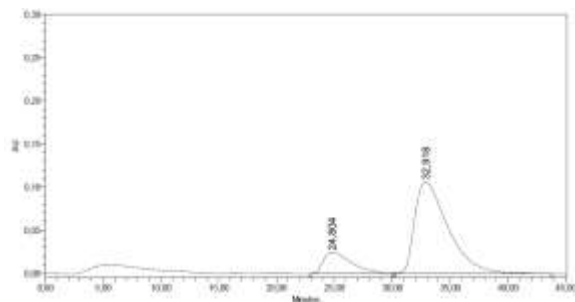

| RT       | Area     | % Area | Height |
|----------|----------|--------|--------|
| 1 24.004 | 4237253  | 16.42  | 25181  |
| 2 32.918 | 21574702 | 83.58  | 107003 |

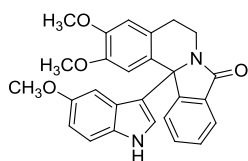

**2d**, racemic mixture

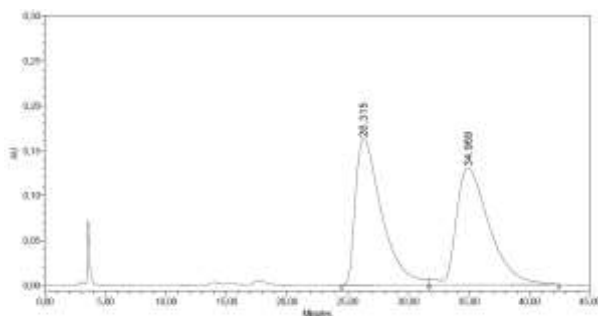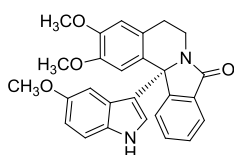

**(R)-2d**, 52 % *ee*,

Table 8, entry 7

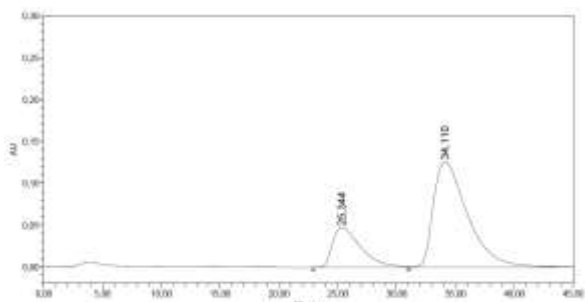

| RT       | Area     | % Area | Height |
|----------|----------|--------|--------|
| 1 25.344 | 5063197  | 23.82  | 47922  |
| 2 34.110 | 25723432 | 76.18  | 128958 |

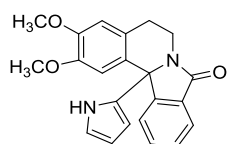

**2e**, racemic mixture

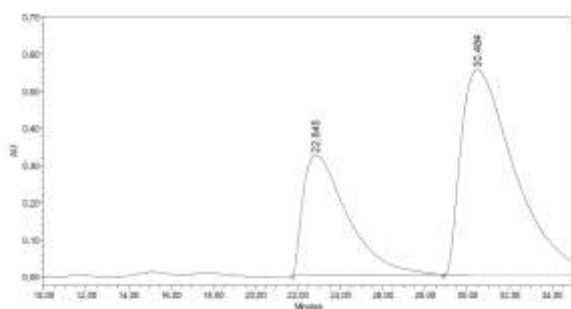

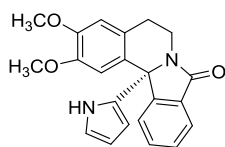

**(R)-2e**, 54 % *ee*,  
Table 8, entry 7

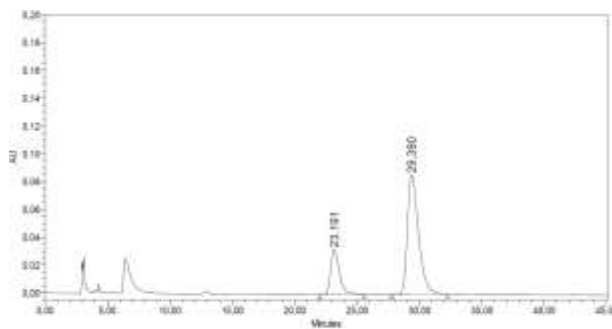

| RT       | Area    | % Area | Height |
|----------|---------|--------|--------|
| 1 23.191 | 1569316 | 22.87  | 32404  |
| 2 29.360 | 5293577 | 77.13  | 85889  |

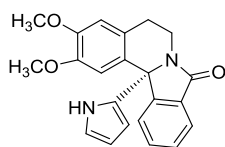

**(R)-2e**, 24 % *ee*,  
Table 8, entry 15

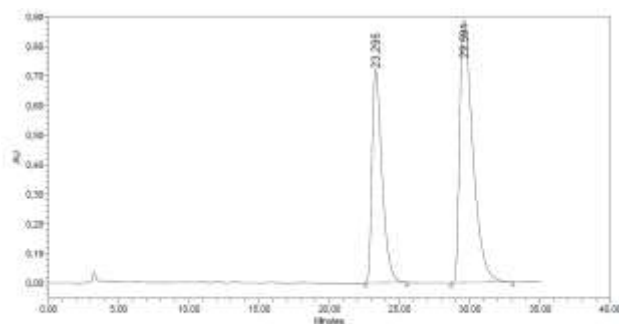

| RT       | Area     | % Area | Height |
|----------|----------|--------|--------|
| 1 23.295 | 35583127 | 38.17  | 718953 |
| 2 29.501 | 57638288 | 61.83  | 887221 |

## 5. Copies of $^1\text{H}$ and $^{13}\text{C}$ NMR of 2a-e

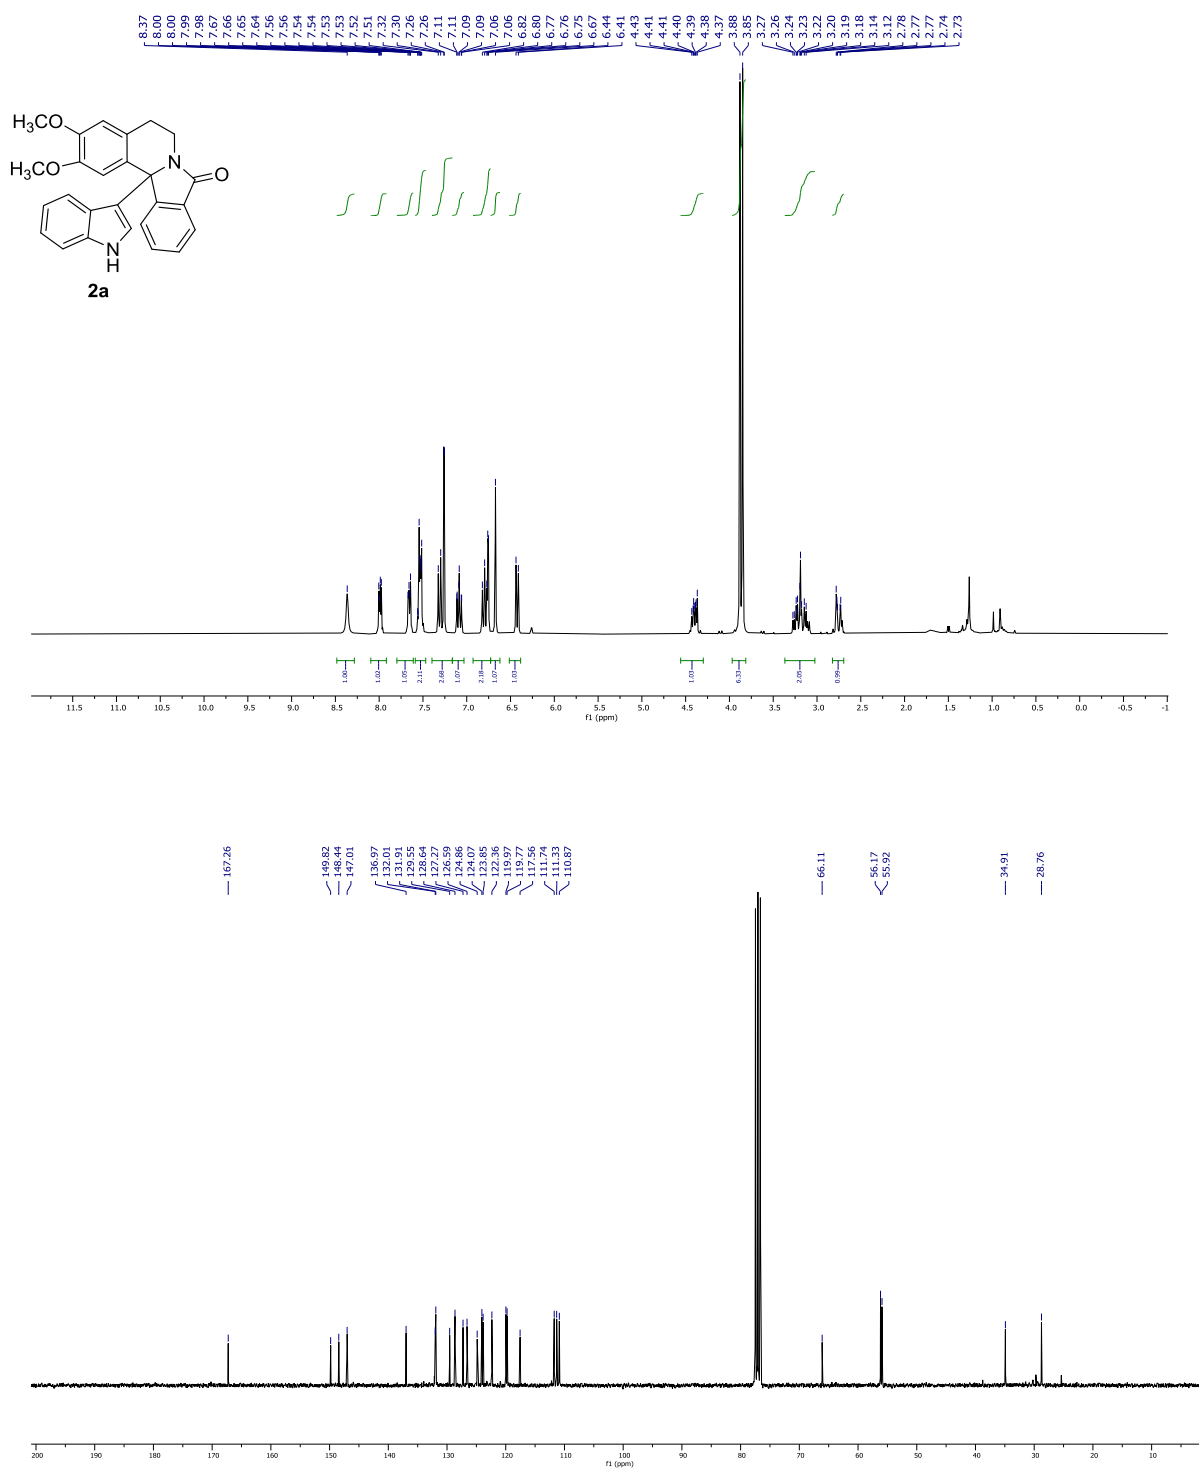



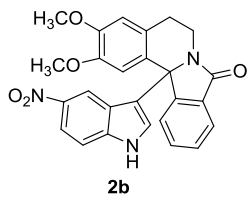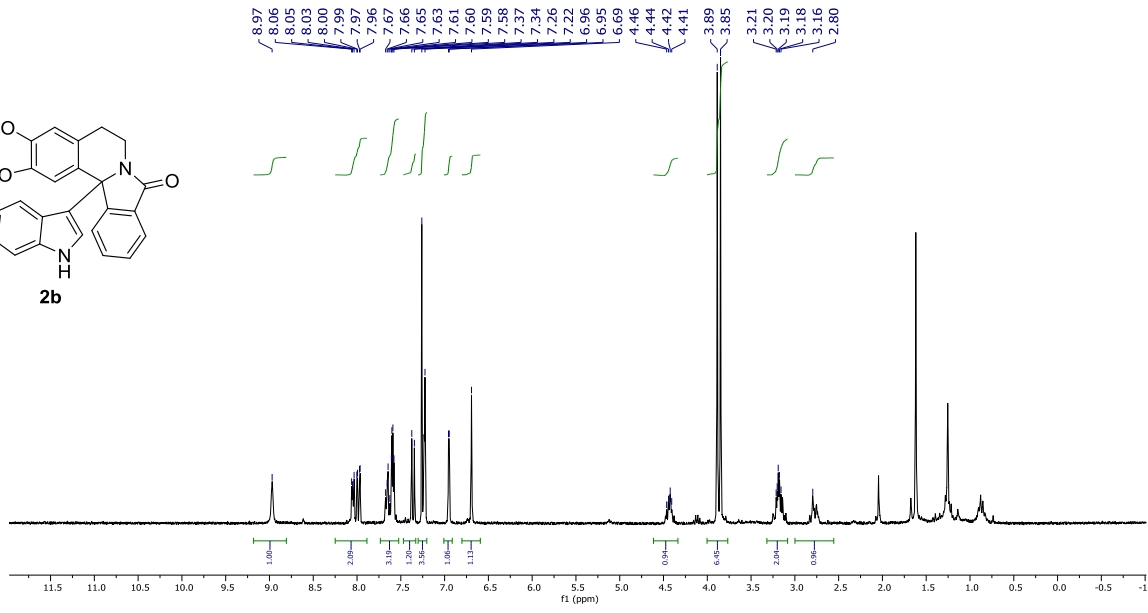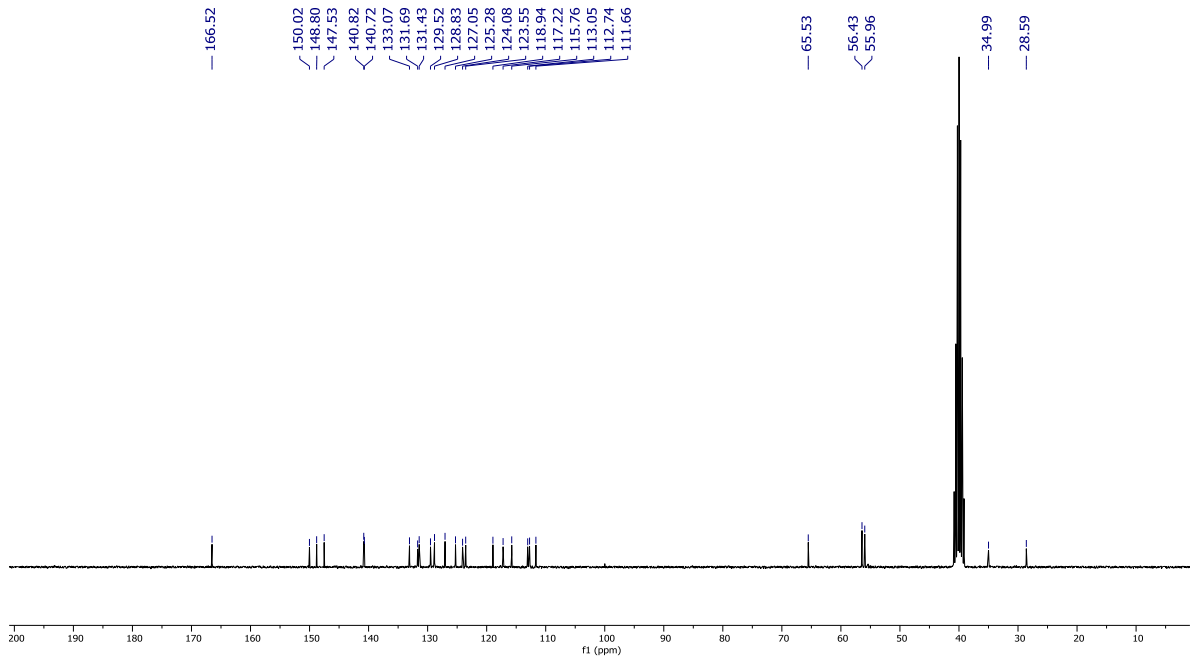

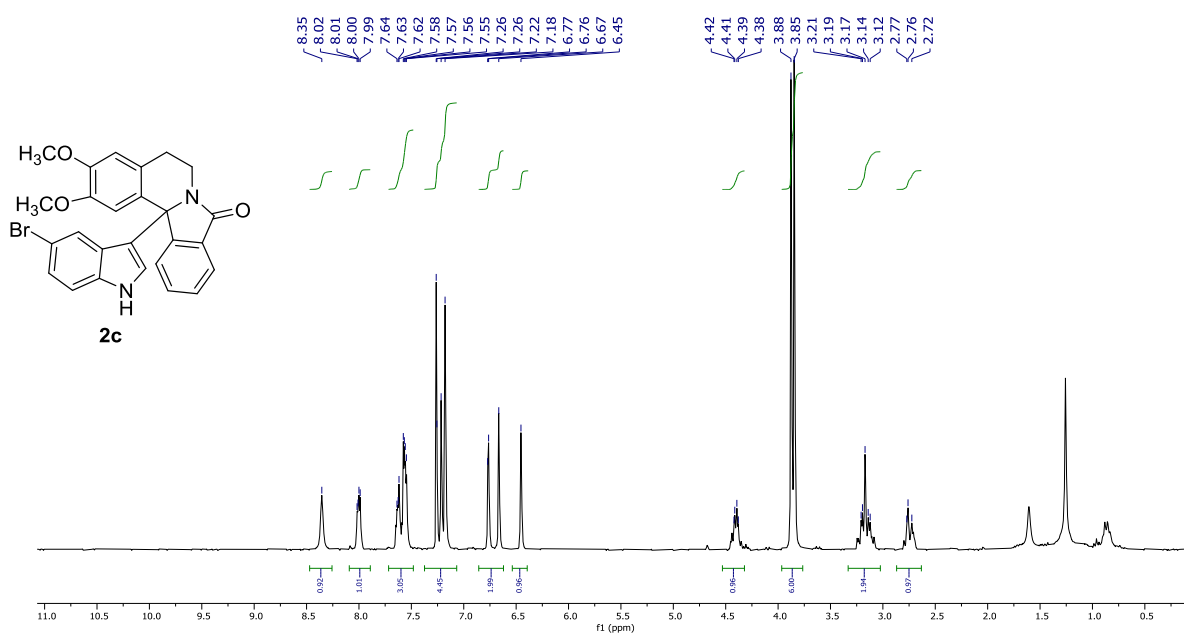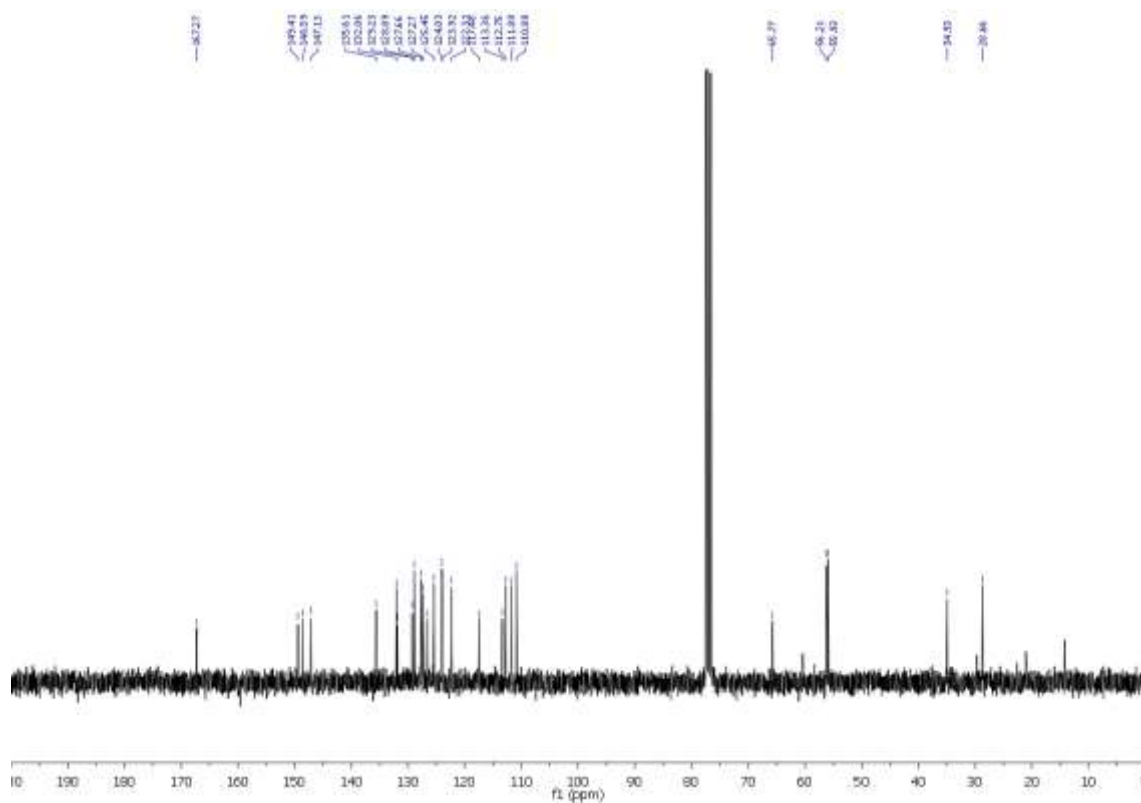

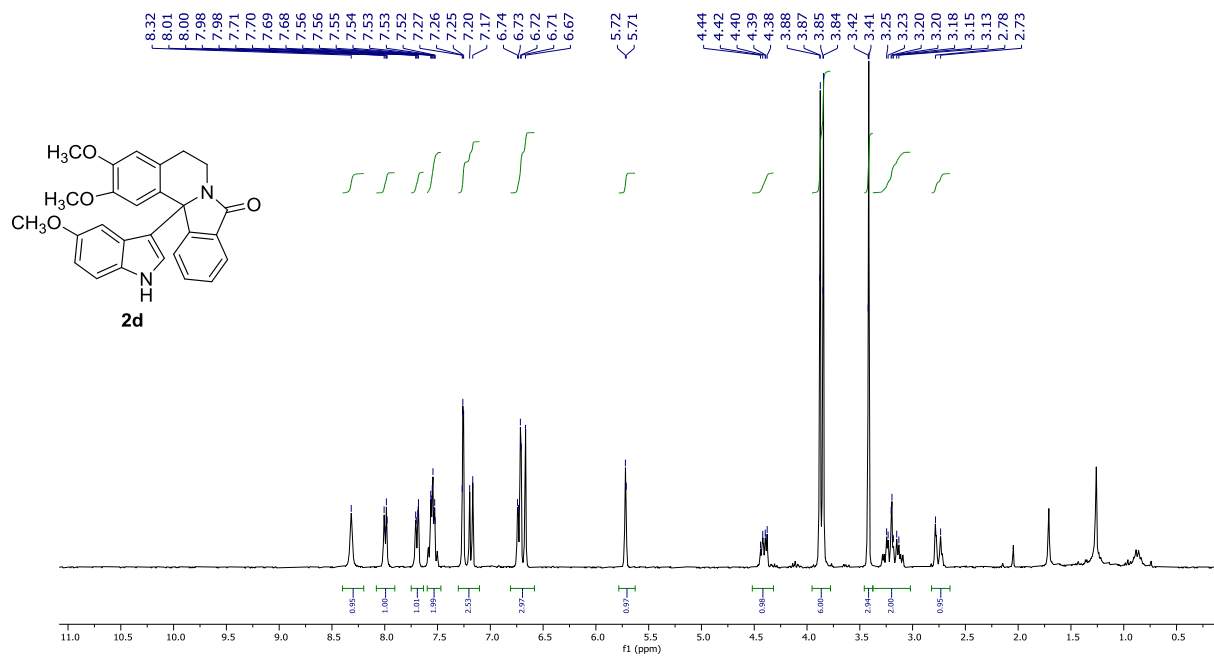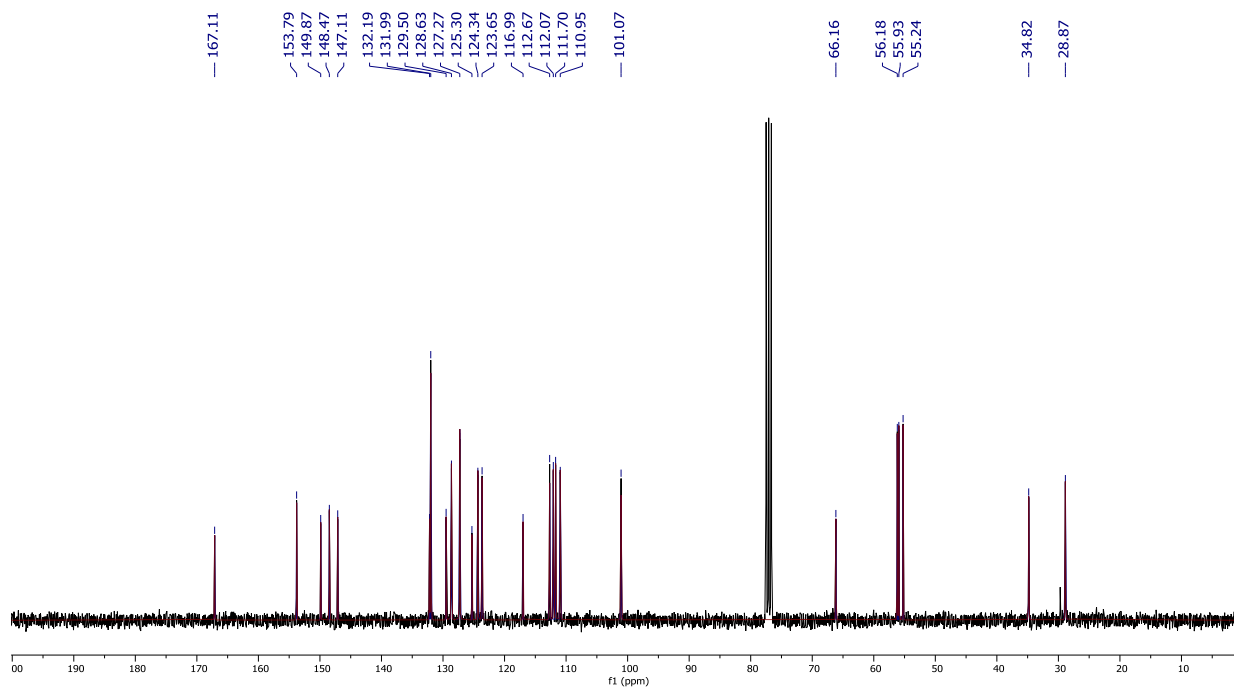

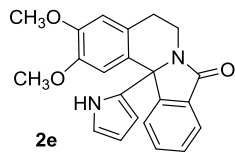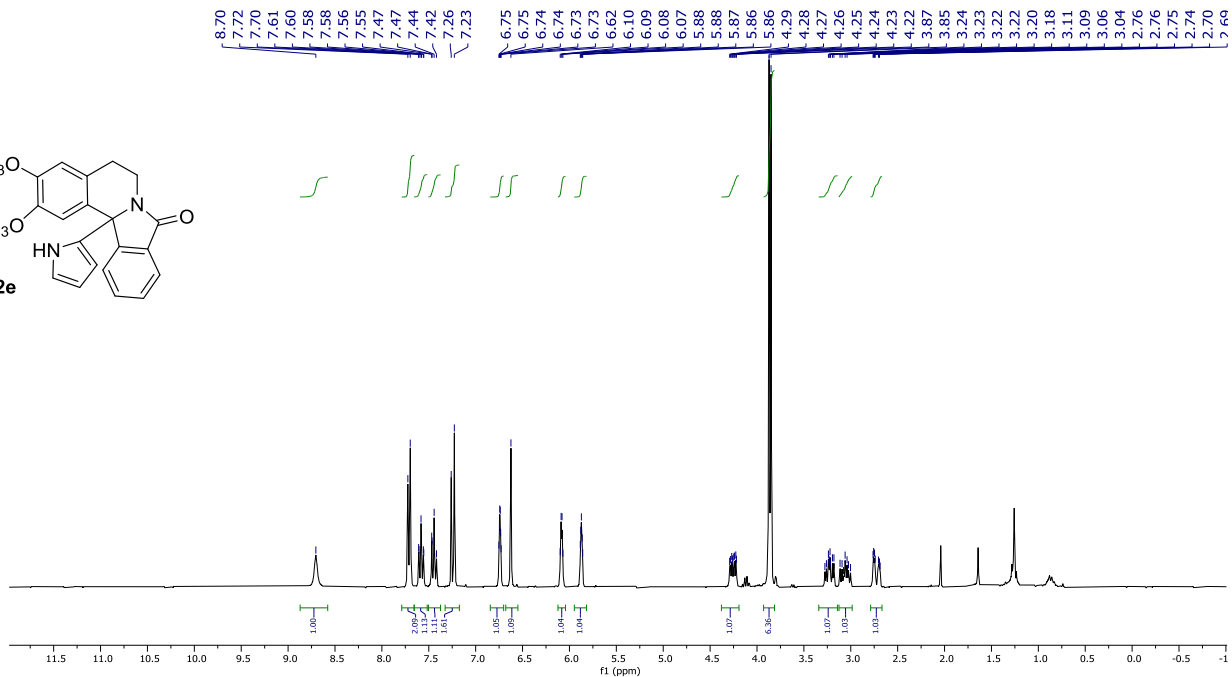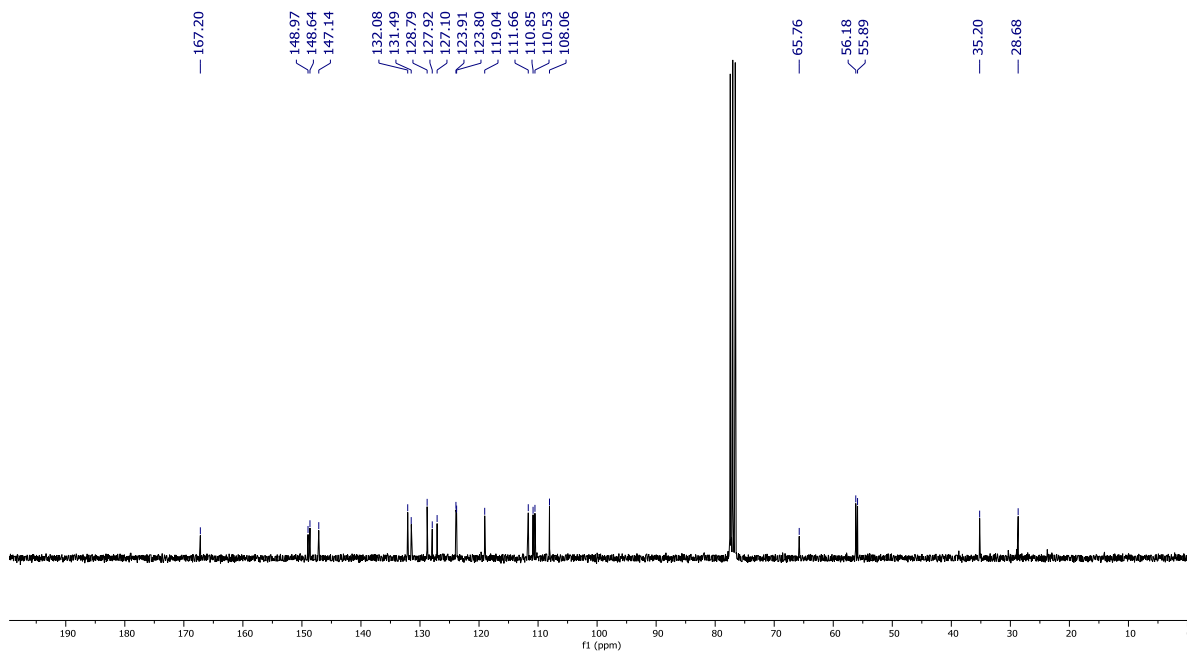

## 6. General reaction equations for the reference reactions in the database

In the following schemes the general equations for the reactions included in the database are shown including the bibliographic reference. FileSI02.xls contains the full experimental detail for each reaction (substrate, nucleophile, catalyst, reaction conditions, yield, and ee). Molecule codes are depicted in the next section.

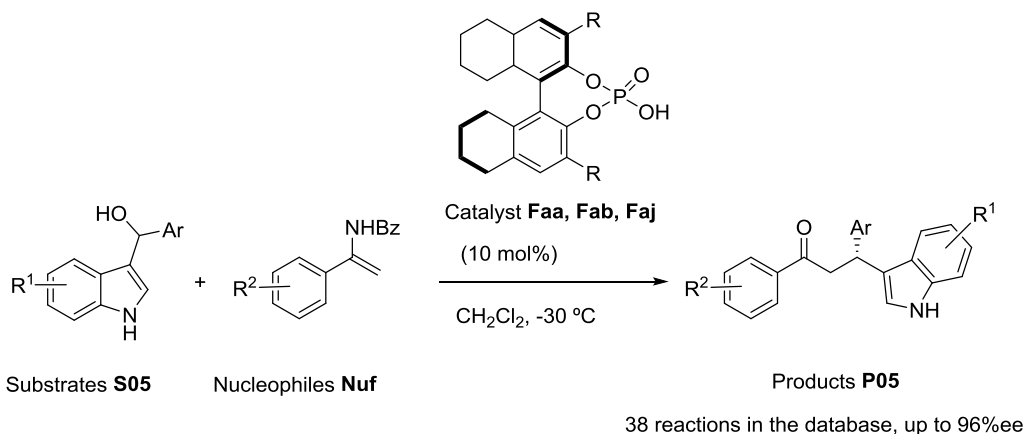

**Scheme S1.** General reaction from: Guo, Q. X.; Peng, Y. G.; Zhang, J. W.; Song, L.; Feng, Z.; Gong, L. Z. *Org. Lett.* **2009**, 11, 4620;

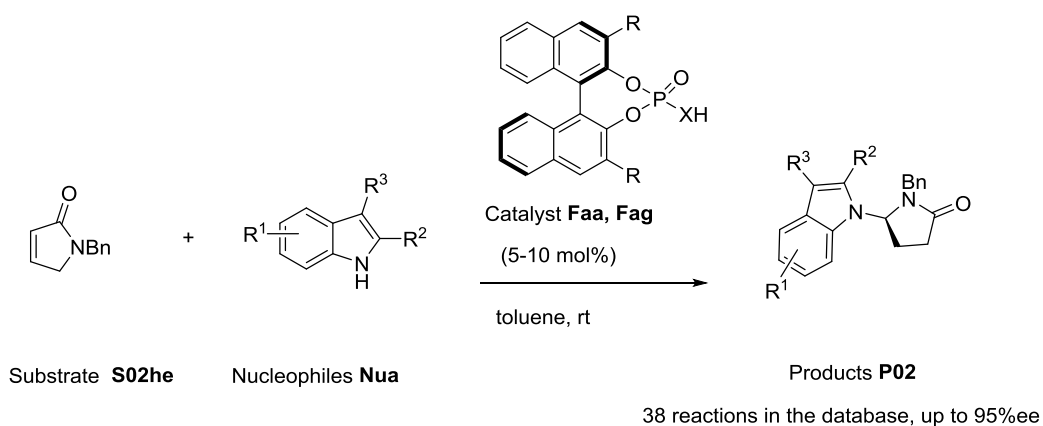

**Scheme S2.** General reaction from: Xie, Y.; Zhao, Y.; Qian, B.; Yang, L.; Xia, C.; Huang, H. *Angew. Chem. Int. Ed.* **2011**, 50, 5682;

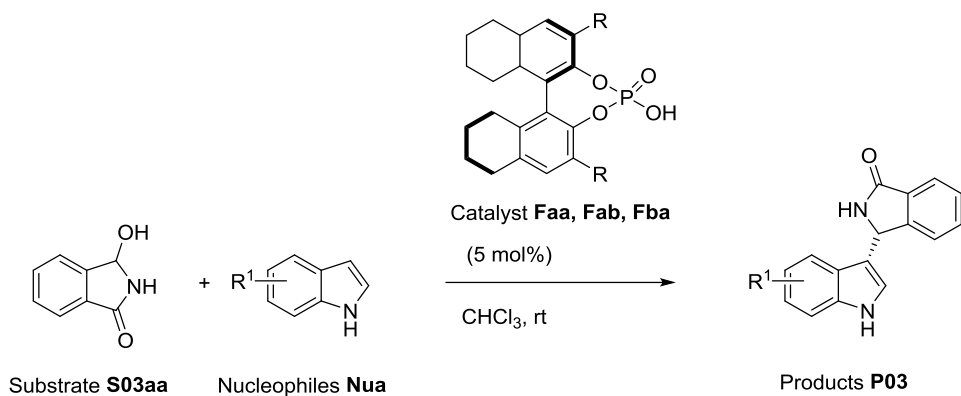

33 reactions in the database, up to 83%ee

**Scheme S3.** General reaction from: Yu, X.; Lu, A.; Wang, Y.; Wu, G.; Song, H.; Zhou, Z.; Tang, C. *Eur. J. Org. Chem.* **2011**, 892;

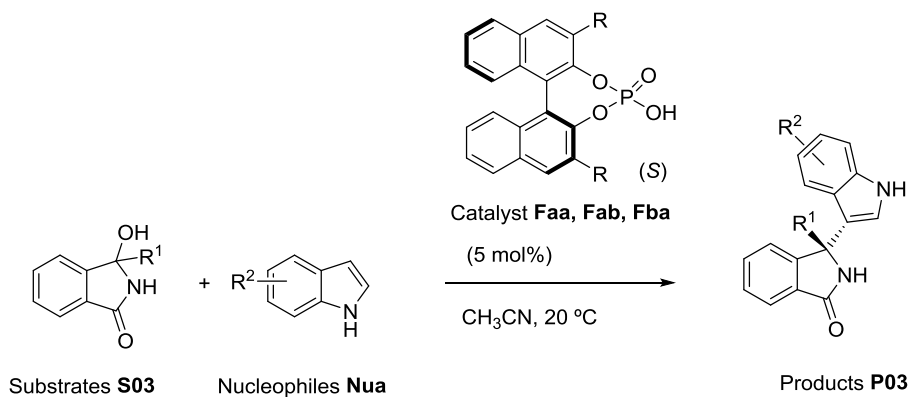

52 reactions in the database, up to -95%ee

**Scheme S4.** General reaction from: Yu, X.; Lu, A.; Wang, Y.; Wu, G.; Song, H.; Zhou, Z.; Tang, C. *Eur. J. Org. Chem.* **2011**, 3060;

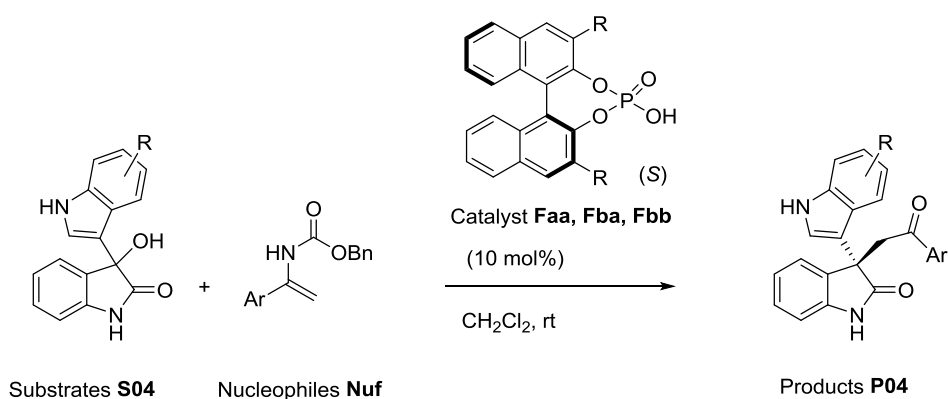

31 reactions in the database, up to -96%ee

**Scheme S5.** General reaction from: Guo, C.; Song, J.; Huang, J. Z.; Chen, P. H.; Luo, S. W.; Gong, L. Z. *Angew. Chem. Int. Ed.* **2012**, 51, 1046.

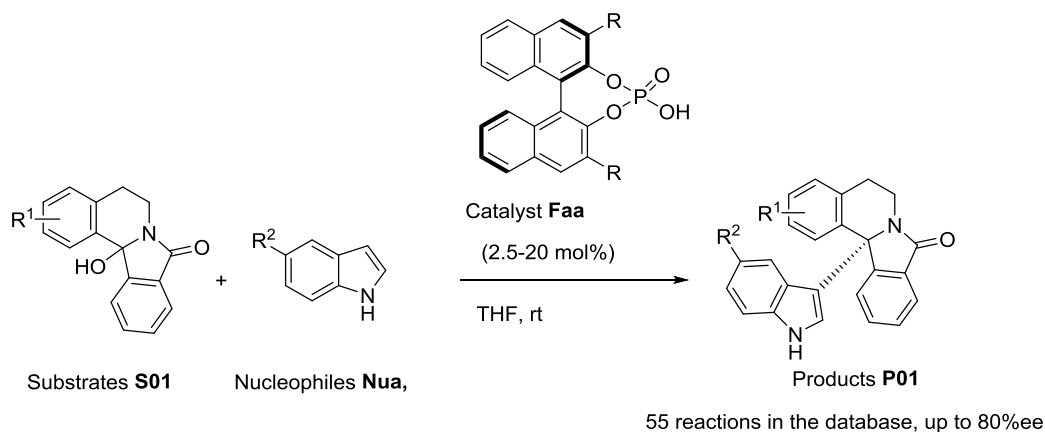

**Scheme S6.** General reaction from: Aranzamendi, E.; Sotomayor, N.; Lete, E. *J. Org. Chem.* **2012**, *77*, 2986.

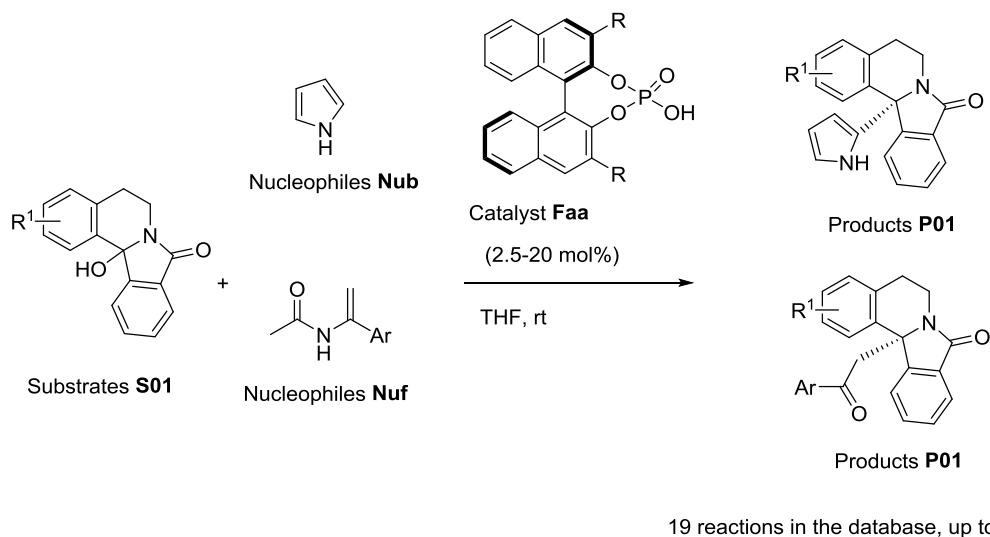

**Scheme S7.** General reaction from: E. Aranzamendi, Doctoral Thesis, 2014, UPV/EHU (unpublished results), and Aranzamendi, E.; Arrasate, S. Sotomayor, N.; González-Díaz, H.; Lete, E. *ChemistryOpen*. **2016**, *557*, 540.

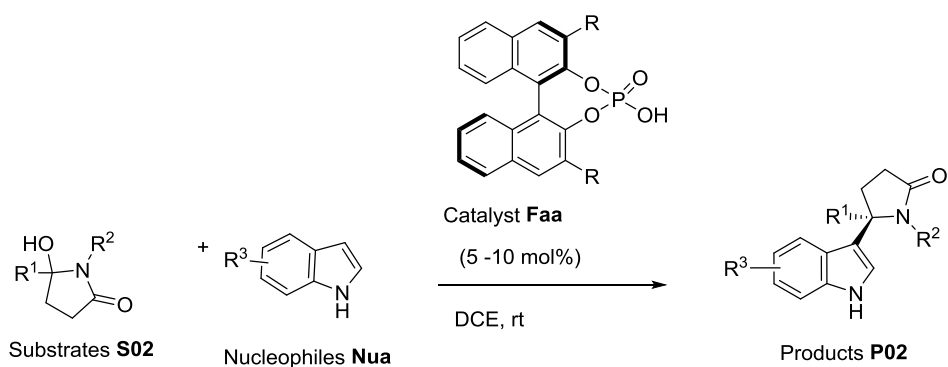

**Scheme S8.** General reaction from: Courant, T.; Kumarn, S.; He, L.; Retailleau, P.; Masson, G.  
*Adv. Synth. Catal.* **2013**, 355, 836;

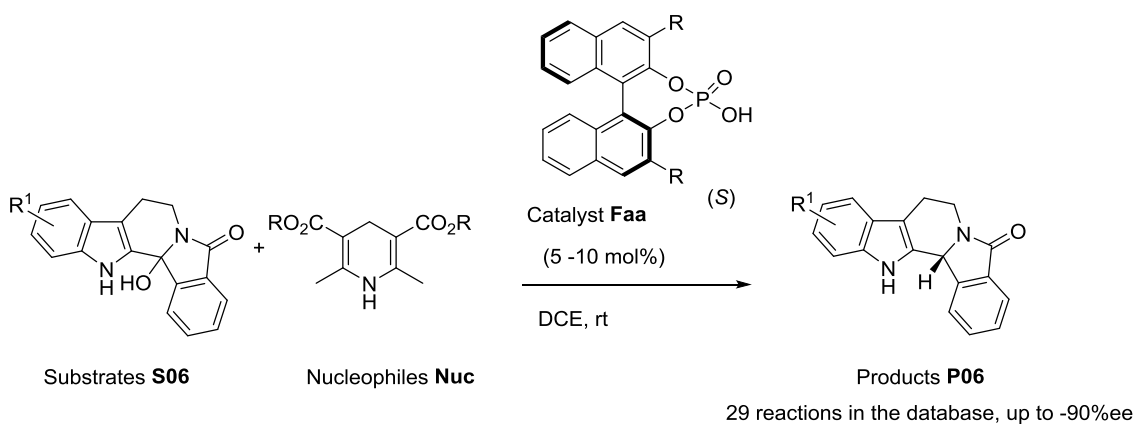

**Scheme S9.** General reaction from: Yin, Q.; Wang, S. -G.; You, S. -L. *Org. Lett.* **2013**, 15, 2688.



## 7. Molecule codes

### SUBSTRATES

#### S01

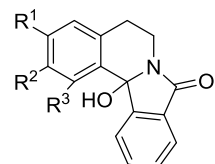

**S01aa**  $R^1 = R^2 = \text{OCH}_3$ ,  $R^3 = \text{H}$

**S01ba**  $R^1 = R^3 = \text{OCH}_3$ ,  $R^2 = \text{H}$

**S01ca**  $R^1 = R^3 = R^2 = \text{OCH}_3$

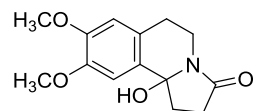

**S01ab**

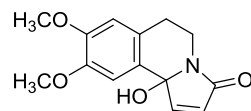

**S01ac**

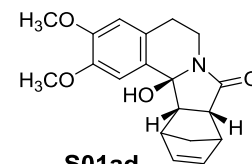

**S01ad**

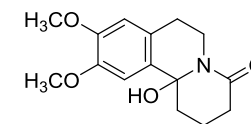

**S01ae**

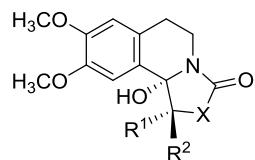

**S01af**  $X = \text{NCH}_3$ ,  $R^1 = R^2 = \text{CH}_3$

**S01ag**  $X = \text{NCH}_3$ ,  $R^1 = \text{H}$ ,  $R^2 = \text{Bn}$

**S01ah**  $X = \text{S}$ ,  $R^1 = R^2 = \text{H}$

**S01ai**  $X = \text{O}$ ,  $R^1 = R^2 = \text{H}$

**S01aj**  $X = \text{NCH}_3$ ,  $R^1 = \text{CH}_3$ ,  $R^2 = \text{Bn}$

**S01ak**  $X = \text{S}$ ,  $R^1 = \text{H}$ ,  $R^2 = \text{Bn}$

**S01al**  $X = \text{S}$ ,  $R^1 = \text{CH}_3$ ,  $R^2 = \text{H}$

**S01am**  $X = \text{S}$ ,  $R^1 = \text{Ph}$ ,  $R^2 = \text{CH}_3$

**S02**

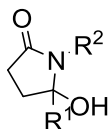

**S02aa** R<sup>1</sup> = H, R<sup>2</sup> = Ph

**S02ac** R<sup>1</sup> = H, R<sup>2</sup> = 4-BrC<sub>6</sub>H<sub>4</sub>

**S02ad** R<sup>1</sup> = H, R<sup>2</sup> = 4-IC<sub>6</sub>H<sub>4</sub>

**S02ae** R<sup>1</sup> = H, R<sup>2</sup> = Bn

**S02aa** R<sup>1</sup> = H, R<sup>2</sup> = Ph

**S02ac** R<sup>1</sup> = H, R<sup>2</sup> = 4-BrC<sub>6</sub>H<sub>4</sub>

**S02ad** R<sup>1</sup> = H, R<sup>2</sup> = 4-IC<sub>6</sub>H<sub>4</sub>

**S02bb** R<sup>1</sup> = CH<sub>3</sub>, R<sup>2</sup> = 4-CH<sub>3</sub>C<sub>6</sub>H<sub>4</sub>

**S02be** R<sup>1</sup> = CH<sub>3</sub>, R<sup>2</sup> = Bn

**S02bf** R<sup>1</sup> = CH<sub>3</sub>, R<sup>2</sup> = 2-CH<sub>3</sub>OC<sub>6</sub>H<sub>4</sub>CH<sub>2</sub>

**S02bg** R<sup>1</sup> = CH<sub>3</sub>, R<sup>2</sup> = 4-CH<sub>3</sub>OC<sub>6</sub>H<sub>4</sub>CH<sub>2</sub>

**S02bh** R<sup>1</sup> = CH<sub>3</sub>, R<sup>2</sup> = allyl

**S02ce** R<sup>1</sup> = Et, R<sup>2</sup> = Bn

**S02de** R<sup>1</sup> = propyl, R<sup>2</sup> = Bn

**S02ee** R<sup>1</sup> = *n*Bu, R<sup>2</sup> = Bn

**S02fe** R<sup>1</sup> = pentyl, R<sup>2</sup> = Bn

**S02ge** R<sup>1</sup> = Bn, R<sup>2</sup> = Bn

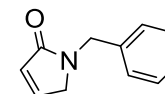

**S02he**

**S03**

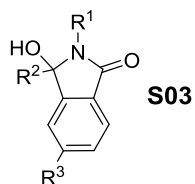

**S03aa** R<sup>1</sup> = H, R<sup>2</sup> = H, R<sup>3</sup> = H

**S03ab** R<sup>1</sup> = H, R<sup>2</sup> = H, R<sup>3</sup> = Br

**S03ba** R<sup>1</sup> = H, R<sup>2</sup> = CH<sub>3</sub>, R<sup>3</sup> = H

**S03ca** R<sup>1</sup> = H, R<sup>2</sup> = Et, R<sup>3</sup> = H

**S03da** R<sup>1</sup> = H, R<sup>2</sup> = Bu, R<sup>3</sup> = H

**S03ea** R<sup>1</sup> = H, R<sup>2</sup> = allyl, R<sup>3</sup> = H

**S03fa** R<sup>1</sup> = H, R<sup>2</sup> = Ph, R<sup>3</sup> = H

**S03ac** R<sup>1</sup> = CH<sub>3</sub>, R<sup>2</sup> = R<sup>3</sup> = H

**S03ad** R<sup>1</sup> = Ph, R<sup>2</sup> = R<sup>3</sup> = H

**S03da** R<sup>1</sup> = H, R<sup>2</sup> = Bu, R<sup>3</sup> = H

**S04**

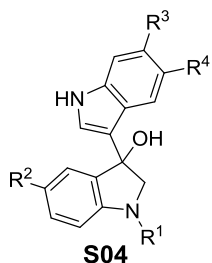

**S04aa** R<sup>1</sup> = R<sup>2</sup> = R<sup>3</sup> = R<sup>4</sup> = H

**S04ac** R<sup>1</sup> = tertbutylacetyl, R<sup>2</sup> = R<sup>3</sup> = R<sup>4</sup> = H

**S04ca** R<sup>1</sup> = R<sup>2</sup> = R<sup>3</sup> = H, R<sup>4</sup> = Br

**S04da** R<sup>1</sup> = R<sup>2</sup> = R<sup>3</sup> = H, R<sup>4</sup> = OCH<sub>3</sub>

**S04ea** R<sup>1</sup> = R<sup>2</sup> = R<sup>3</sup> = H, R<sup>4</sup> = Cl

**S04fa** R<sup>1</sup> = R<sup>2</sup> = H, R<sup>3</sup> = CH<sub>3</sub>, R<sup>4</sup> = H

**S04ga** R<sup>1</sup> = R<sup>2</sup> = R<sup>3</sup> = H, R<sup>4</sup> = F

**S04ha** R<sup>1</sup> = R<sup>2</sup> = R<sup>3</sup> = F, R<sup>4</sup> = H

**S04ad** R<sup>1</sup> = H, R<sup>2</sup> = F, R<sup>3</sup> = R<sup>4</sup> = H

**S04ae** R<sup>1</sup> = H, R<sup>2</sup> = CH<sub>3</sub>, R<sup>3</sup> = R<sup>4</sup> = H

**S04fe** R<sup>1</sup> = H, R<sup>2</sup> = R<sup>3</sup> = CH<sub>3</sub>, R<sup>4</sup> = H

**S04fd** R<sup>1</sup> = H, R<sup>2</sup> = F, R<sup>3</sup> = CH<sub>3</sub>, R<sup>4</sup> = H

**S04hd** R<sup>1</sup> = H, R<sup>2</sup> = F, R<sup>3</sup> = H, R<sup>4</sup> = F

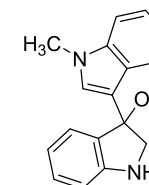

**S04ba**

**S05**

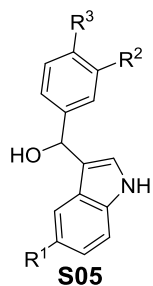

- S05aa** R<sup>1</sup> = R<sup>2</sup> = R<sup>3</sup> = H  
**S05ab** R<sup>1</sup> = R<sup>2</sup> = H, R<sup>3</sup> = CH<sub>3</sub>  
**S05ac** R<sup>1</sup> = R<sup>2</sup> = H, R<sup>3</sup> = Cl  
**S05ad** R<sup>1</sup> = R<sup>2</sup> = H, R<sup>3</sup> = Br  
**S05ae** R<sup>1</sup> = R<sup>2</sup> = H, R<sup>3</sup> = CN  
**S05af** R<sup>1</sup> = R<sup>2</sup> = H, R<sup>3</sup> = CF<sub>3</sub>  
**S05ag** R<sup>1</sup> = H, R<sup>2</sup> = F, R<sup>3</sup> = H  
**S05ah** R<sup>1</sup> = H, R<sup>2</sup> = NO<sub>2</sub>, R<sup>3</sup> = H

- S05ai** R<sup>1</sup> = H, R<sup>2</sup> = CN, R<sup>3</sup> = H  
**S05aj** R<sup>1</sup> = H, R<sup>2</sup> = R<sup>3</sup> = F  
**S05ak** R<sup>1</sup> = H, R<sup>2</sup> = Cl, R<sup>3</sup> = F  
**S05be** R<sup>1</sup> = Cl, R<sup>2</sup> = H, R<sup>3</sup> = CN  
**S05ce** R<sup>1</sup> = Br, R<sup>2</sup> = H, R<sup>3</sup> = CN  
**S05de** R<sup>1</sup> = CH<sub>3</sub>, R<sup>2</sup> = H, R<sup>3</sup> = CN

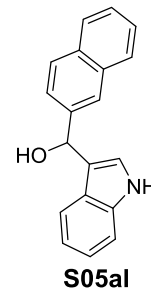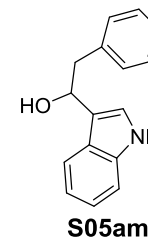

**S06**

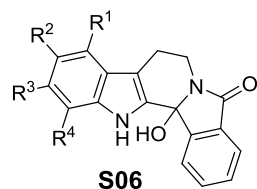

- S06aa** R<sup>1</sup> = R<sup>2</sup> = R<sup>3</sup> = R<sup>4</sup> = H  
**S06ba** R<sup>1</sup> = CH<sub>3</sub>, R<sup>2</sup> = R<sup>3</sup> = R<sup>4</sup> = H  
**S06ca** R<sup>1</sup> = H, R<sup>2</sup> = CH<sub>3</sub>, R<sup>3</sup> = R<sup>4</sup> = H  
**S06da** R<sup>1</sup> = R<sup>2</sup> = H, R<sup>3</sup> = CH<sub>3</sub>, R<sup>4</sup> = H  
**S06ea** R<sup>1</sup> = R<sup>2</sup> = R<sup>3</sup> = H, R<sup>4</sup> = CH<sub>3</sub>

- S06fa** R<sup>1</sup> = H, R<sup>2</sup> = OCH<sub>3</sub>, R<sup>3</sup> = R<sup>4</sup> = H  
**S06ga** R<sup>1</sup> = H, R<sup>2</sup> = Cl, R<sup>3</sup> = R<sup>4</sup> = H  
**S06ha** R<sup>1</sup> = H, R<sup>2</sup> = Br, R<sup>3</sup> = R<sup>4</sup> = H  
**S06ia** R<sup>1</sup> = R<sup>2</sup> = H, R<sup>3</sup> = Br, R<sup>4</sup> = H  
**S06ja** R<sup>1</sup> = H, R<sup>2</sup> = F, R<sup>3</sup> = R<sup>4</sup> = H

**S07-S09**

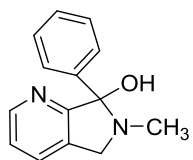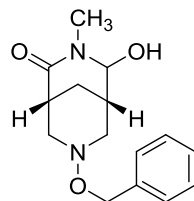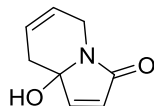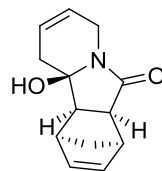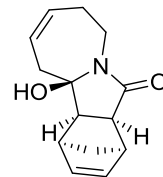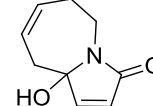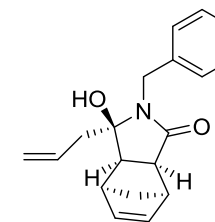

NUCLEOPHILES

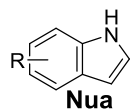

|              |                        |              |                       |              |                                                          |              |           |
|--------------|------------------------|--------------|-----------------------|--------------|----------------------------------------------------------|--------------|-----------|
| <b>Nua01</b> | R = H                  | <b>Nua08</b> | R = 5-NO <sub>2</sub> | <b>Nua15</b> | R = 2,3-CH <sub>3</sub>                                  | <b>Nua22</b> | R = 7-OBn |
| <b>Nua02</b> | R = 6-OCH <sub>3</sub> | <b>Nua09</b> | R = 6-F               | <b>Nua16</b> | R = 2-Et-3-CH <sub>3</sub>                               | <b>Nua23</b> | R = 6-OBn |
| <b>Nua03</b> | R = 5-OCH <sub>3</sub> | <b>Nua10</b> | R = 5-F               | <b>Nua17</b> | R = 2-CH <sub>3</sub> -5-pent                            | <b>Nua24</b> | R = 5-OBn |
| <b>Nua04</b> | R = 5-Br               | <b>Nua11</b> | R = 7-CH <sub>3</sub> | <b>Nua18</b> | R = 2-BrEt                                               | <b>Nua25</b> | R = 4-OBn |
| <b>Nua05</b> | R = 6-Cl               | <b>Nua12</b> | R = 5-CH <sub>3</sub> | <b>Nua19</b> | R = 2,3-CH <sub>3</sub> -5-Cl                            |              |           |
| <b>Nua06</b> | R = 6-Cl               | <b>Nua13</b> | R = 3-CH <sub>3</sub> | <b>Nua20</b> | R = 2-Ph                                                 |              |           |
| <b>Nua07</b> | R = 5-Cl               | <b>Nua14</b> | R = 2-CH <sub>3</sub> | <b>Nua21</b> | R = 2-(2'-CH <sub>3</sub> )C <sub>6</sub> H <sub>4</sub> |              |           |

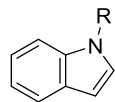

**Nua26** R = Bn  
**Nua33** R = CH<sub>3</sub>

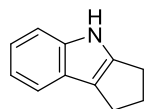

**Nua27**

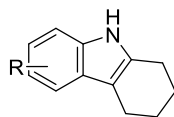

**Nua28** R = H  
**Nua29** R = 6-CH<sub>3</sub>  
**Mua30** R = 6-Cl

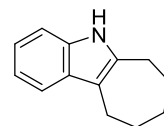

**Nua31**

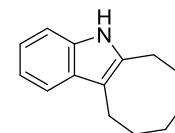

**Nua32**

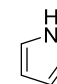

**Nub01**

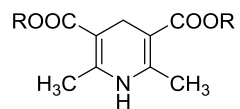

**Nuc01** R = *t*Bu  
**Nuc02** R = Et

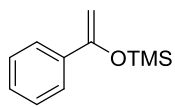

**Nud01**

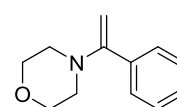

**Nue01**

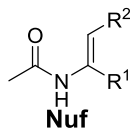

**Nuf01** R<sup>1</sup> = Ph, R<sup>2</sup> = H

**Nuf110** R<sup>1</sup> = 4-CH<sub>3</sub>C<sub>6</sub>H<sub>4</sub>, R<sup>2</sup> = H

**Nuf12** R<sup>1</sup> = 4-OCH<sub>3</sub>C<sub>6</sub>H<sub>4</sub>, R<sup>2</sup> = H

**Nuf13** R<sup>1</sup> = 4-CH<sub>3</sub>CONHC<sub>6</sub>H<sub>4</sub>, R<sup>2</sup> = H

**Nuf14** R<sup>1</sup> = 4-BrC<sub>6</sub>H<sub>4</sub>, R<sup>2</sup> = H

**Nuf15** R<sup>1</sup> = 4-ClC<sub>6</sub>H<sub>4</sub>, R<sup>2</sup> = H

**Nuf16** R<sup>1</sup> = 4-FC<sub>6</sub>H<sub>4</sub>, R<sup>2</sup> = H

**Nuf17** R<sup>1</sup> = 4-NO<sub>2</sub>C<sub>6</sub>H<sub>4</sub>, R<sup>2</sup> = H

**Nuf18** R<sup>1</sup> = 3-OCH<sub>3</sub>C<sub>6</sub>H<sub>4</sub>, R<sup>2</sup> = H

**Nuf19** R<sup>1</sup> = 3,4-(CH<sub>3</sub>)<sub>2</sub>C<sub>6</sub>H<sub>3</sub>, R<sup>2</sup> = H

**Nuf20** R<sup>1</sup> = 2,5-(CH<sub>3</sub>)<sub>2</sub>C<sub>6</sub>H<sub>3</sub>, R<sup>2</sup> = H

**Nuf21** R<sup>1</sup> = 2-naphthyl, R<sup>2</sup> = H

**Nuf22** R<sup>1</sup> = 5,6,7,8-tetrahydronaphth-2-yl  
R<sup>2</sup> = H

**Nuf23** R<sup>1</sup> = Ph, R<sup>2</sup> = CH<sub>3</sub>

**Nuf87** R<sup>1</sup> = 4-CH<sub>3</sub>, R<sup>2</sup> = CH<sub>3</sub>

**Nuf88** R<sup>1</sup> = 4-OCH<sub>3</sub>C<sub>6</sub>H<sub>4</sub>, R<sup>2</sup> = CH<sub>3</sub>

**Nuf89** R<sup>1</sup> = 4-CH<sub>3</sub>CONHC<sub>6</sub>H<sub>4</sub>, R<sup>2</sup> = CH<sub>3</sub>

**Nuf90** R<sup>1</sup> = 4-BrC<sub>6</sub>H<sub>4</sub>, R<sup>2</sup> = CH<sub>3</sub>

**Nuf91** R<sup>1</sup> = 4-ClC<sub>6</sub>H<sub>4</sub>, R<sup>2</sup> = CH<sub>3</sub>

**Nuf92** R<sup>1</sup> = 4-FC<sub>6</sub>H<sub>4</sub>, R<sup>2</sup> = CH<sub>3</sub>

**Nuf93** R<sup>1</sup> = 4-NO<sub>2</sub>C<sub>6</sub>H<sub>4</sub>, R<sup>2</sup> = CH<sub>3</sub>

**Nuf94** R<sup>1</sup> = 3-OCH<sub>3</sub>C<sub>6</sub>H<sub>4</sub>, R<sup>2</sup> = CH<sub>3</sub>

**Nuf95** R<sup>1</sup> = 3,4-(CH<sub>3</sub>)<sub>2</sub>C<sub>6</sub>H<sub>3</sub>, R<sup>2</sup> = CH<sub>3</sub>

**Nuf96** R<sup>1</sup> = 2,5-(CH<sub>3</sub>)<sub>2</sub>C<sub>6</sub>H<sub>3</sub>, R<sup>2</sup> = CH<sub>3</sub>

**Nuf97** R<sup>1</sup> = 2-naphthyl, R<sup>2</sup> = CH<sub>3</sub>

**Nuf98** R<sup>1</sup> = 5,6,7,8-tetrahydronaphthyl, R<sup>2</sup> = CH<sub>3</sub>

**Nuf101** R<sup>1</sup> = 3,4-ClC<sub>6</sub>H<sub>4</sub>, R<sup>2</sup> = H

**Nuf102** R<sup>1</sup> = 4-CH<sub>3</sub>OCOPh, R<sup>2</sup> = H

**Nuf103** R<sup>1</sup> = 3-CNC<sub>6</sub>H<sub>4</sub>, R<sup>2</sup> = H

**Nuf105** R<sup>1</sup> = pyridine-3-yl, R<sup>2</sup> = H

**Nuf106** R<sup>1</sup> = 3-(1'-(phenylsulfonyl)-1H-pyrrol-3-yl), R<sup>2</sup> = H

**Nuf104** R<sup>1</sup> = 2,3-dihydrobenzo[b][1,4]dioxin-6-yl, R<sup>2</sup> = H

**Nuf107** R<sup>1</sup> = thiophene-2-yl, R<sup>2</sup> = H

**Nuf108** R<sup>1</sup> = benzofuran-2-yl, R<sup>2</sup> = H

**Nuf109** R<sup>1</sup> = styryl, R<sup>2</sup> = H

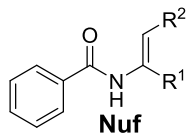

**Nuf24** R<sup>1</sup> = 4-OCH<sub>3</sub>C<sub>6</sub>H<sub>4</sub>, R<sup>2</sup> = H

**Nuf25** R<sup>1</sup> = 4-CH<sub>3</sub>CONHC<sub>6</sub>H<sub>4</sub>, R<sup>2</sup> = H

**Nuf26** R<sup>1</sup> = 4-BrC<sub>6</sub>H<sub>4</sub>, R<sup>2</sup> = H

**Nuf27** R<sup>1</sup> = 4-FC<sub>6</sub>H<sub>4</sub>, R<sup>2</sup> = H

**Nuf28** R<sup>1</sup> = 4-NO<sub>2</sub>C<sub>6</sub>H<sub>4</sub>, R<sup>2</sup> = H

**Nuf29** R<sup>1</sup> = 3,4-CH<sub>3</sub>C<sub>6</sub>H<sub>4</sub>, R<sup>2</sup> = H

**Nuf30** R<sup>1</sup> = 2,5-(CH<sub>3</sub>)<sub>2</sub>C<sub>6</sub>H<sub>3</sub>, R<sup>2</sup> = H

**Nuf31** R<sup>1</sup> = 2-naphthyl, R<sup>2</sup> = H

**Nuf32** R<sup>1</sup> = 3-OCH<sub>3</sub>C<sub>6</sub>H<sub>4</sub>, R<sup>2</sup> = H

**Nuf33** R<sup>1</sup> = 5,6,7,8-tetrahydronaphthyl  
R<sup>2</sup> = H

**Nuf36** R<sup>1</sup> = Ph, R<sup>2</sup> = CH<sub>3</sub>

**Nuf02** R<sup>1</sup> = Ph, R<sup>2</sup> = H

**Nuf03** R<sup>1</sup> = 4-ClC<sub>6</sub>H<sub>4</sub>, R<sup>2</sup> = H

**Nuf04** R<sup>1</sup> = 4-CH<sub>3</sub>C<sub>6</sub>H<sub>4</sub>, R<sup>2</sup> = H

**Nuf05** R<sup>1</sup> = Ph, R<sup>2</sup> = CH<sub>3</sub>

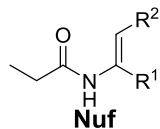

**Nuf34** R<sup>1</sup> = 4-CH<sub>3</sub>C<sub>6</sub>H<sub>4</sub>, R<sup>2</sup> = H

**Nuf35** R<sup>1</sup> = 4-OCH<sub>3</sub>C<sub>6</sub>H<sub>4</sub>, R<sup>2</sup> = H

**Nuf37** R<sup>1</sup> = 4-ClC<sub>6</sub>H<sub>4</sub>, R<sup>2</sup> = H

**Nuf38** R<sup>1</sup> = 4-CH<sub>3</sub>CONHC<sub>6</sub>H<sub>4</sub>, R<sup>2</sup> = H

**Nuf39** R<sup>1</sup> = 4-BrC<sub>6</sub>H<sub>4</sub>, R<sup>2</sup> = H

**Nuf40** R<sup>1</sup> = 4-FC<sub>6</sub>H<sub>4</sub>, R<sup>2</sup> = H

**Nuf41** R<sup>1</sup> = 4-NO<sub>2</sub>C<sub>6</sub>H<sub>4</sub>, R<sup>2</sup> = H

**Nuf42** R<sup>1</sup> = 3-OCH<sub>3</sub>C<sub>6</sub>H<sub>4</sub>, R<sup>2</sup> = H

**Nuf43** R<sup>1</sup> = 3,4-(CH<sub>3</sub>)<sub>2</sub>C<sub>6</sub>H<sub>3</sub>, R<sup>2</sup> = H

**Nuf44** R<sup>1</sup> = 2,5-(CH<sub>3</sub>)<sub>2</sub>C<sub>6</sub>H<sub>3</sub>, R<sup>2</sup> = H

**Nuf45** R<sup>1</sup> = 2-naphthyl, R<sup>2</sup> = H

**Nuf46**

**Nuf47** R<sup>1</sup> = Ph, R<sup>2</sup> = CH<sub>3</sub>

**Nuf06** R<sup>1</sup> = Ph, R<sup>2</sup> = H

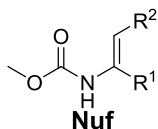

**Nuf48** R<sup>1</sup> = 4-ClC<sub>6</sub>H<sub>4</sub>, R<sup>2</sup> = H  
**Nuf49** R<sup>1</sup> = 4-CH<sub>3</sub>C<sub>6</sub>H<sub>4</sub>, R<sup>2</sup> = H  
**Nuf50** R<sup>1</sup> = 4-OCH<sub>3</sub>C<sub>6</sub>H<sub>4</sub>, R<sup>2</sup> = H  
**Nuf51** R<sup>1</sup> = 4-CH<sub>3</sub>CONHC<sub>6</sub>H<sub>4</sub>, R<sup>2</sup> = H  
**Nuf52** R<sup>1</sup> = 4-BrC<sub>6</sub>H<sub>4</sub>, R<sup>2</sup> = H

**Nuf54** R<sup>1</sup> = 4-FC<sub>6</sub>H<sub>4</sub>, R<sup>2</sup> = H  
**Nuf55** R<sup>1</sup> = 4-NO<sub>2</sub>C<sub>6</sub>H<sub>4</sub>, R<sup>2</sup> = H  
**Nuf56** R<sup>1</sup> = 3-OCH<sub>3</sub>C<sub>6</sub>H<sub>4</sub>, R<sup>2</sup> = H  
**Nuf57** R<sup>1</sup> = 3,4-(CH<sub>3</sub>)<sub>2</sub>C<sub>6</sub>H<sub>3</sub>, R<sup>2</sup> = H  
**Nuf58** R<sup>1</sup> = 2,5-(CH<sub>3</sub>)<sub>2</sub>C<sub>6</sub>H<sub>3</sub>, R<sup>2</sup> = H

**Nuf59** R<sup>1</sup> = 2-naphthyl, R<sup>2</sup> = H  
**Nuf60**  
**Nuf61** R<sup>1</sup> = Ph, R<sup>2</sup> = CH<sub>3</sub>  
**Nuf07** R<sup>1</sup> = Ph, R<sup>2</sup> = H

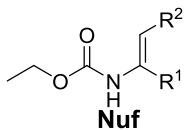

**Nuf62** R<sup>1</sup> = 4-ClC<sub>6</sub>H<sub>4</sub>, R<sup>2</sup> = H  
**Nuf63** R<sup>1</sup> = 4-CH<sub>3</sub>C<sub>6</sub>H<sub>4</sub>, R<sup>2</sup> = H  
**Nuf64** R<sup>1</sup> = 4-OCH<sub>3</sub>C<sub>6</sub>H<sub>4</sub>, R<sup>2</sup> = H  
**Nuf65** R<sup>1</sup> = 4-CH<sub>3</sub>CONHC<sub>6</sub>H<sub>4</sub>, R<sup>2</sup> = H  
**Nuf66** R<sup>1</sup> = 4-BrC<sub>6</sub>H<sub>4</sub>, R<sup>2</sup> = H

**Nuf68** R<sup>1</sup> = 4-FC<sub>6</sub>H<sub>4</sub>, R<sup>2</sup> = H  
**Nuf69** R<sup>1</sup> = 4-NO<sub>2</sub>C<sub>6</sub>H<sub>4</sub>, R<sup>2</sup> = H  
**Nuf70** R<sup>1</sup> = 3-OCH<sub>3</sub>C<sub>6</sub>H<sub>4</sub>, R<sup>2</sup> = H  
**Nuf71** R<sup>1</sup> = 3,4-(CH<sub>3</sub>)<sub>2</sub>C<sub>6</sub>H<sub>3</sub>, R<sup>2</sup> = H  
**Nuf72** R<sup>1</sup> = 2,5-(CH<sub>3</sub>)<sub>2</sub>C<sub>6</sub>H<sub>3</sub>, R<sup>2</sup> = H

**Nuf73** R<sup>1</sup> = 2-naphthyl, R<sup>2</sup> = H  
**Nuf74**  
**Nuf75** R<sup>1</sup> = Ph, R<sup>2</sup> = CH<sub>3</sub>  
**Nuf08** R<sup>1</sup> = Ph, R<sup>2</sup> = H

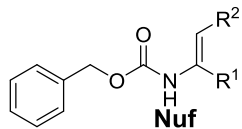

**Nuf76** R<sup>1</sup> = 4-OCH<sub>3</sub>C<sub>6</sub>H<sub>4</sub>, R<sup>2</sup> = H  
**Nuf77** R<sup>1</sup> = 4-CH<sub>3</sub>CONHC<sub>6</sub>H<sub>4</sub>, R<sup>2</sup> = H  
**Nuf78** R<sup>1</sup> = 4-BrC<sub>6</sub>H<sub>4</sub>, R<sup>2</sup> = H  
**Nuf79** R<sup>1</sup> = 4-FC<sub>6</sub>H<sub>4</sub>, R<sup>2</sup> = H  
**Nuf80** R<sup>1</sup> = 4-NO<sub>2</sub>C<sub>6</sub>H<sub>4</sub>, R<sup>2</sup> = H

**Nuf81** R<sup>1</sup> = 3-OCH<sub>3</sub>C<sub>6</sub>H<sub>4</sub>, R<sup>2</sup> = H  
**Nuf82** R<sup>1</sup> = 3,4-(CH<sub>3</sub>)<sub>2</sub>C<sub>6</sub>H<sub>3</sub>, R<sup>2</sup> = H  
**Nuf83** R<sup>1</sup> = 2,5-(CH<sub>3</sub>)<sub>2</sub>C<sub>6</sub>H<sub>3</sub>, R<sup>2</sup> = H  
**Nuf84** R<sup>1</sup> = 2-naphthyl, R<sup>2</sup> = H  
**Nuf11** R<sup>1</sup> = 4-ClC<sub>6</sub>H<sub>4</sub>, R<sup>2</sup> = H

**Nuf86** R<sup>1</sup> = Ph, R<sup>2</sup> = CH<sub>3</sub>  
**Nuf09** R<sup>1</sup> = Ph, R<sup>2</sup> = H  
**Nuf10** R<sup>1</sup> = 4-CH<sub>3</sub>C<sub>6</sub>H<sub>4</sub>, R<sup>2</sup> = H  
**Nuf85**

## CATALYSTS

### Phosphoric acids

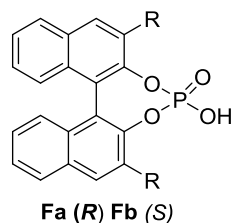

|              |                                                     |              |                                                                       |              |                                                                                                                           |
|--------------|-----------------------------------------------------|--------------|-----------------------------------------------------------------------|--------------|---------------------------------------------------------------------------------------------------------------------------|
| <b>Faa01</b> | R = H                                               | <b>Faa08</b> | R = 4-CH <sub>3</sub> OC <sub>6</sub> H <sub>4</sub>                  | <b>Fba15</b> | R = POPh <sub>2</sub>                                                                                                     |
| <b>Fba01</b> | R = H                                               | <b>Faa09</b> | R = 1-naphthyl                                                        | <b>Faa16</b> | R = 4-CH <sub>3</sub> C <sub>6</sub> H <sub>4</sub>                                                                       |
| <b>Faa02</b> | R = 9-anthracyl                                     | <b>Fba09</b> | R = 1-naphthyl                                                        | <b>Faa17</b> | R = 3,5-F <sub>2</sub> C <sub>6</sub> H <sub>3</sub>                                                                      |
| <b>Fba02</b> | R = 9-anthracyl                                     | <b>Faa10</b> | R = 2,4,6-( <i>i</i> Pr) <sub>3</sub> C <sub>6</sub> H <sub>2</sub>   | <b>Faa18</b> | R = 4-(2',4',6'-(CH <sub>3</sub> ) <sub>3</sub> C <sub>6</sub> H <sub>2</sub> )C <sub>6</sub> H <sub>5</sub>              |
| <b>Faa03</b> | R = SiCH <sub>3</sub> Ph <sub>2</sub>               | <b>Fba10</b> | R = 2,4,6-( <i>i</i> Pr) <sub>3</sub> C <sub>6</sub> H <sub>2</sub>   | <b>Faa19</b> | R = 2,4,6-(CH <sub>3</sub> ) <sub>3</sub> C <sub>6</sub> H <sub>2</sub>                                                   |
| <b>Faa04</b> | R = 9-phenanthryl                                   | <b>Faa11</b> | R = SiPh <sub>3</sub>                                                 | <b>Faa20</b> | R = 3,5-(CH <sub>3</sub> ) <sub>2</sub> C <sub>6</sub> H <sub>3</sub>                                                     |
| <b>Faa05</b> | R = 2-naphthyl                                      | <b>Fba11</b> | R = SiPh <sub>3</sub>                                                 | <b>Faa21</b> | R = 4-(4'- <i>t</i> BuC <sub>6</sub> H <sub>4</sub> )C <sub>6</sub> H <sub>4</sub>                                        |
| <b>Fba05</b> | R = 2-naphthyl                                      | <b>Faa12</b> | R = 3,5-(CF <sub>3</sub> ) <sub>2</sub> C <sub>6</sub> H <sub>3</sub> | <b>Faa22</b> | R = 4-(4'- <i>t</i> Bu-2',6'-(CH <sub>3</sub> ) <sub>2</sub> C <sub>6</sub> H <sub>3</sub> )C <sub>6</sub> H <sub>4</sub> |
| <b>Faa06</b> | R = Ph                                              | <b>Fba12</b> | R = 3,5-(CF <sub>3</sub> ) <sub>2</sub> C <sub>6</sub> H <sub>3</sub> | <b>Faa23</b> | R = CF <sub>3</sub>                                                                                                       |
| <b>Fba06</b> | R = Ph                                              | <b>Fba13</b> | R = 4-ClC <sub>6</sub> H <sub>4</sub>                                 | <b>Faa24</b> | R = 3,5-( <i>t</i> Bu) <sub>2</sub> C <sub>6</sub> H <sub>3</sub>                                                         |
| <b>Faa07</b> | R = 4-NO <sub>2</sub> C <sub>6</sub> H <sub>4</sub> | <b>Fba14</b> | R = 1,1'-biphenyl                                                     | <b>Faa25</b> | R = 4- <i>t</i> BuC <sub>6</sub> H <sub>5</sub>                                                                           |

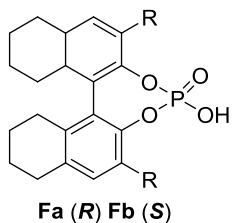

|              |                                       |              |                                                                                                              |              |                                                                                                                           |
|--------------|---------------------------------------|--------------|--------------------------------------------------------------------------------------------------------------|--------------|---------------------------------------------------------------------------------------------------------------------------|
| <b>Fab01</b> | R = 4-ClC <sub>6</sub> H <sub>4</sub> | <b>Fab09</b> | R = 4-NO <sub>2</sub> C <sub>6</sub> H <sub>4</sub>                                                          | <b>Fab18</b> | R = 3,5-(CH <sub>3</sub> ) <sub>2</sub> C <sub>6</sub> H <sub>3</sub>                                                     |
| <b>Fab02</b> | R = SiPh <sub>3</sub>                 | <b>Fab10</b> | R = 4-CH <sub>3</sub> OC <sub>6</sub> H <sub>4</sub>                                                         | <b>Fab19</b> | R = 4-(4'- <i>t</i> BuC <sub>6</sub> H <sub>4</sub> )C <sub>6</sub> H <sub>4</sub>                                        |
| <b>Fab03</b> | R = Ph                                | <b>Fab11</b> | R = 1-naphthyl                                                                                               | <b>Fab20</b> | R = 4-(4'- <i>t</i> Bu-2',6'-(CH <sub>3</sub> ) <sub>2</sub> C <sub>6</sub> H <sub>3</sub> )C <sub>6</sub> H <sub>4</sub> |
| <b>Fab04</b> | R = 2-naphthyl                        | <b>Fab12</b> | R = 2,4,6-( <i>i</i> Pr) <sub>3</sub> C <sub>6</sub> H <sub>2</sub>                                          | <b>Fab21</b> | R = CF <sub>3</sub>                                                                                                       |
| <b>Fab05</b> | R = 9-phenanthryl                     | <b>Fab13</b> | R = 3,5-(CF <sub>3</sub> ) <sub>2</sub> C <sub>6</sub> H <sub>3</sub>                                        | <b>Fab22</b> | R = 3,5-( <i>t</i> Bu) <sub>2</sub> C <sub>6</sub> H <sub>3</sub>                                                         |
| <b>Fbb05</b> | R = 9-phenanthryl                     | <b>Fab14</b> | R = POPh <sub>2</sub>                                                                                        | <b>Fab23</b> | R = SiCH <sub>3</sub> Ph <sub>2</sub>                                                                                     |
| <b>Fab06</b> | R = H                                 | <b>Fab15</b> | R = 4-CH <sub>3</sub> C <sub>6</sub> H <sub>4</sub>                                                          | <b>Fab24</b> | R = 3,5-F <sub>2</sub> Ph                                                                                                 |
| <b>Fab07</b> | R = 9-anthracyl                       | <b>Fab16</b> | R = 4-(2',4',6'-(CH <sub>3</sub> ) <sub>3</sub> C <sub>6</sub> H <sub>2</sub> )C <sub>6</sub> H <sub>4</sub> | <b>Fab25</b> | R = 4- <i>t</i> BuC <sub>6</sub> H <sub>5</sub>                                                                           |
| <b>Fab08</b> | R = 1,1'-biphenyl                     | <b>Fab17</b> | R = 2,4,6-(CH <sub>3</sub> ) <sub>3</sub> C <sub>6</sub> H <sub>2</sub>                                      |              |                                                                                                                           |

## N-Triflylphosphoramides

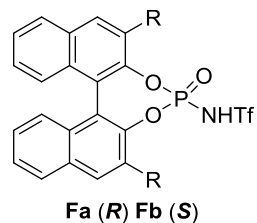

|              |                                                       |              |                                                                                                              |              |                                                                                                                  |
|--------------|-------------------------------------------------------|--------------|--------------------------------------------------------------------------------------------------------------|--------------|------------------------------------------------------------------------------------------------------------------|
| <b>Fac01</b> | R = Ph                                                | <b>Fac10</b> | R = 4-CH <sub>3</sub> OC <sub>6</sub> H <sub>4</sub>                                                         | <b>Fac19</b> | R = 3,5-(CH <sub>3</sub> ) <sub>2</sub> C <sub>6</sub> H <sub>3</sub>                                            |
| <b>Fac02</b> | R = 9-phenanthryl                                     | <b>Fac11</b> | R = 1-naphthyl                                                                                               | <b>Fac20</b> | R = 4-(4'-tBuC <sub>6</sub> H <sub>4</sub> )C <sub>6</sub> H <sub>4</sub>                                        |
| <b>Fac03</b> | R = 9-anthracyl                                       | <b>Fac12</b> | R = 2,4,6-(iPr) <sub>3</sub> C <sub>6</sub> H <sub>2</sub>                                                   | <b>Fac21</b> | R = 4-(4'-tBu-2',6'-(CH <sub>3</sub> ) <sub>2</sub> C <sub>6</sub> H <sub>3</sub> )C <sub>6</sub> H <sub>4</sub> |
| <b>Fac04</b> | R = 3,5-CF <sub>3</sub> C <sub>6</sub> H <sub>3</sub> | <b>Fac13</b> | R = 4-Cl C <sub>6</sub> H <sub>4</sub>                                                                       | <b>Fac22</b> | R = CF <sub>3</sub>                                                                                              |
| <b>Fac05</b> | R = 4-NO <sub>2</sub> C <sub>6</sub> H <sub>4</sub>   | <b>Fac14</b> | R = POPh <sub>2</sub>                                                                                        | <b>Fac23</b> | R = 3,5-(tBu) <sub>2</sub> C <sub>6</sub> H <sub>3</sub>                                                         |
| <b>Fac06</b> | R = 1,1'-biphenyl                                     | <b>Fac15</b> | R = 4-CH <sub>3</sub> C <sub>6</sub> H <sub>4</sub>                                                          | <b>Fac24</b> | R = SiCH <sub>3</sub> Ph <sub>2</sub>                                                                            |
| <b>Fac07</b> | R = SiPh <sub>3</sub>                                 | <b>Fac16</b> | R = 3,5-F <sub>2</sub> Ph                                                                                    | <b>Fac25</b> | R = 4-tBuC <sub>6</sub> H <sub>5</sub>                                                                           |
| <b>Fac08</b> | R = H                                                 | <b>Fac17</b> | R = 4-(2',4',6'-(CH <sub>3</sub> ) <sub>3</sub> C <sub>6</sub> H <sub>2</sub> )C <sub>6</sub> H <sub>4</sub> |              |                                                                                                                  |
| <b>Fac09</b> | R = 2-naphthyl                                        | <b>Fac18</b> | R = 2,4,6-(CH <sub>3</sub> ) <sub>3</sub> C <sub>6</sub> H <sub>2</sub>                                      |              |                                                                                                                  |

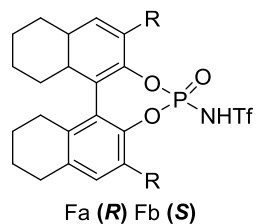

|              |                                                                       |              |                                                                                                              |              |                                                                                                                  |
|--------------|-----------------------------------------------------------------------|--------------|--------------------------------------------------------------------------------------------------------------|--------------|------------------------------------------------------------------------------------------------------------------|
| <b>Fad01</b> | R = SiPh <sub>3</sub>                                                 | <b>Fad10</b> | R = 2,4,6-(iPr) <sub>3</sub> C <sub>6</sub> H <sub>2</sub>                                                   | <b>Fad19</b> | R = 4-(4'-tBu-2',6'-(CH <sub>3</sub> ) <sub>2</sub> C <sub>6</sub> H <sub>3</sub> )C <sub>6</sub> H <sub>4</sub> |
| <b>Fad02</b> | R = 2-naphthyl                                                        | <b>Fad11</b> | R = 4-ClC <sub>6</sub> H <sub>4</sub>                                                                        | <b>Fad20</b> | R = CF <sub>3</sub>                                                                                              |
| <b>Fad03</b> | R = 9-phenanthryl                                                     | <b>Fad12</b> | R = POPh <sub>2</sub>                                                                                        | <b>Fad21</b> | R = 3,5-(tBu) <sub>2</sub> C <sub>6</sub> H <sub>3</sub>                                                         |
| <b>Fad04</b> | R = 3,5-(CF <sub>3</sub> ) <sub>2</sub> C <sub>6</sub> H <sub>3</sub> | <b>Fad13</b> | R = 4-CH <sub>3</sub> C <sub>6</sub> H <sub>4</sub>                                                          | <b>Fad22</b> | R = SiCH <sub>3</sub> Ph <sub>2</sub>                                                                            |
| <b>Fad05</b> | R = 4-NO <sub>2</sub> C <sub>6</sub> H <sub>4</sub>                   | <b>Fad14</b> | R = 3,5-FC <sub>6</sub> H <sub>4</sub>                                                                       | <b>Fad23</b> | R = Ph                                                                                                           |
| <b>Fad06</b> | R = 1,1'-biphenyl                                                     | <b>Fad15</b> | R = 4-(2',4',6'-(CH <sub>3</sub> ) <sub>3</sub> C <sub>6</sub> H <sub>2</sub> )C <sub>6</sub> H <sub>4</sub> | <b>Fad24</b> | R = 9-anthracenyl                                                                                                |
| <b>Fad07</b> | R = H                                                                 | <b>Fad16</b> | R = 2,4,6-(CH <sub>3</sub> ) <sub>2</sub> C <sub>6</sub> H <sub>3</sub>                                      | <b>Fad25</b> | R = 4-tBuC <sub>6</sub> H <sub>5</sub>                                                                           |
| <b>Fad08</b> | R = 4-CH <sub>3</sub> OC <sub>6</sub> H <sub>4</sub>                  | <b>Fad17</b> | R = 3,5-(CH <sub>3</sub> ) <sub>2</sub> C <sub>6</sub> H <sub>3</sub>                                        |              |                                                                                                                  |
| <b>Fad09</b> | R = 1-naphthyl                                                        | <b>Fad18</b> | R = 4-(4'-tBuC <sub>6</sub> H <sub>4</sub> )C <sub>6</sub> H <sub>4</sub>                                    |              |                                                                                                                  |



## Miscellaneous

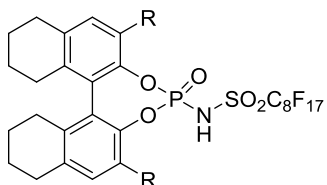

Fa (R) Fb (S)

|              |                                                                       |              |                                                                                                              |              |                                                                                                                           |
|--------------|-----------------------------------------------------------------------|--------------|--------------------------------------------------------------------------------------------------------------|--------------|---------------------------------------------------------------------------------------------------------------------------|
| <b>Faj01</b> | R = SiPh <sub>3</sub>                                                 | <b>Faj10</b> | R = 2,4,6-( <i>i</i> Pr) <sub>3</sub> C <sub>6</sub> H <sub>2</sub>                                          | <b>Faj19</b> | R = 4-(4'- <i>t</i> Bu-2',6'-(CH <sub>3</sub> ) <sub>2</sub> C <sub>6</sub> H <sub>3</sub> )C <sub>6</sub> H <sub>4</sub> |
| <b>Faj02</b> | R = 2-naphthyl                                                        | <b>Faj11</b> | R = 4-ClC <sub>6</sub> H <sub>4</sub>                                                                        | <b>Faj20</b> | R = CF <sub>3</sub>                                                                                                       |
| <b>Faj03</b> | R = 9-phenanthryl                                                     | <b>Faj12</b> | R = POPh <sub>2</sub>                                                                                        | <b>Faj21</b> | R = 3,5-( <i>t</i> Bu) <sub>2</sub> C <sub>6</sub> H <sub>3</sub>                                                         |
| <b>Faj04</b> | R = 3,5-(CF <sub>3</sub> ) <sub>2</sub> C <sub>6</sub> H <sub>3</sub> | <b>Faj13</b> | R = 4-CH <sub>3</sub> C <sub>6</sub> H <sub>4</sub>                                                          | <b>Faj22</b> | R = SiCH <sub>3</sub> Ph <sub>2</sub>                                                                                     |
| <b>Faj05</b> | R = 4-NO <sub>2</sub> C <sub>6</sub> H <sub>4</sub>                   | <b>Faj14</b> | R = 3,5-FPh                                                                                                  | <b>Faj23</b> | R = Ph                                                                                                                    |
| <b>Faj06</b> | R = 1,1'-biphenyl                                                     | <b>Faj15</b> | R = 4-(2',4',6'-(CH <sub>3</sub> ) <sub>3</sub> C <sub>6</sub> H <sub>2</sub> )C <sub>6</sub> H <sub>4</sub> | <b>Faj24</b> | R = 9-anthracyl                                                                                                           |
| <b>Faj07</b> | R = H                                                                 | <b>Faj16</b> | R = 2,4,6-(CH <sub>3</sub> ) <sub>2</sub> C <sub>6</sub> H <sub>3</sub>                                      | <b>Faj25</b> | R = 4- <i>t</i> BuC <sub>6</sub> H <sub>5</sub>                                                                           |
| <b>Faj08</b> | R = 4-CH <sub>3</sub> OC <sub>6</sub> H <sub>4</sub>                  | <b>Faj17</b> | R = 3,5-(CH <sub>3</sub> ) <sub>2</sub> C <sub>6</sub> H <sub>3</sub>                                        |              |                                                                                                                           |
| <b>Faj09</b> | R = 1-naphthyl                                                        | <b>Faj18</b> | R = 4-(4'- <i>t</i> BuC <sub>6</sub> H <sub>4</sub> )C <sub>6</sub> H <sub>4</sub>                           |              |                                                                                                                           |

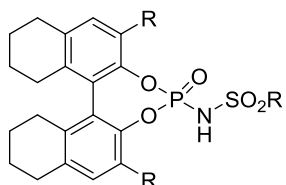

R = 4-CF<sub>3</sub>C<sub>6</sub>H<sub>4</sub>  
Fa (R) Fb (S)

|              |                                                                       |              |                                                                                                              |              |                                                                                                                           |
|--------------|-----------------------------------------------------------------------|--------------|--------------------------------------------------------------------------------------------------------------|--------------|---------------------------------------------------------------------------------------------------------------------------|
| <b>Fak01</b> | R = SiPh <sub>3</sub>                                                 | <b>Fak10</b> | R = 2,4,6-( <i>i</i> Pr) <sub>3</sub> C <sub>6</sub> H <sub>2</sub>                                          | <b>Fak19</b> | R = 4-(4'- <i>t</i> Bu-2',6'-(CH <sub>3</sub> ) <sub>2</sub> C <sub>6</sub> H <sub>3</sub> )C <sub>6</sub> H <sub>4</sub> |
| <b>Fak02</b> | R = 2-naphthyl                                                        | <b>Fak11</b> | R = 4-ClC <sub>6</sub> H <sub>4</sub>                                                                        | <b>Fak20</b> | R = CF <sub>3</sub>                                                                                                       |
| <b>Fak03</b> | R = 9-phenanthryl                                                     | <b>Fak12</b> | R = POPh <sub>2</sub>                                                                                        | <b>Fak21</b> | R = 3,5-( <i>t</i> Bu) <sub>2</sub> C <sub>6</sub> H <sub>3</sub>                                                         |
| <b>Fak04</b> | R = 3,5-(CF <sub>3</sub> ) <sub>2</sub> C <sub>6</sub> H <sub>3</sub> | <b>Fak13</b> | R = 4-CH <sub>3</sub> C <sub>6</sub> H <sub>4</sub>                                                          | <b>Fak22</b> | R = SiCH <sub>3</sub> Ph <sub>2</sub>                                                                                     |
| <b>Fak05</b> | R = 4-NO <sub>2</sub> C <sub>6</sub> H <sub>4</sub>                   | <b>Fak14</b> | R = 3,5-FPh                                                                                                  | <b>Fak23</b> | R = Ph                                                                                                                    |
| <b>Fak06</b> | R = 1,1'-biphenyl                                                     | <b>Fak15</b> | R = 4-(2',4',6'-(CH <sub>3</sub> ) <sub>3</sub> C <sub>6</sub> H <sub>2</sub> )C <sub>6</sub> H <sub>4</sub> | <b>Fak24</b> | R = 9-anthracyl                                                                                                           |
| <b>Fak07</b> | R = H                                                                 | <b>Fak16</b> | R = 2,4,6-(CH <sub>3</sub> ) <sub>2</sub> C <sub>6</sub> H <sub>3</sub>                                      | <b>Fak25</b> | R = 4- <i>t</i> BuC <sub>6</sub> H <sub>5</sub>                                                                           |
| <b>Fak08</b> | R = 4-CH <sub>3</sub> OC <sub>6</sub> H <sub>4</sub>                  | <b>Fak17</b> | R = 3,5-(CH <sub>3</sub> ) <sub>2</sub> C <sub>6</sub> H <sub>3</sub>                                        |              |                                                                                                                           |
| <b>Fak09</b> | R = 1-naphthyl                                                        | <b>Fak18</b> | R = 4-(4'- <i>t</i> BuC <sub>6</sub> H <sub>4</sub> )C <sub>6</sub> H <sub>4</sub>                           |              |                                                                                                                           |

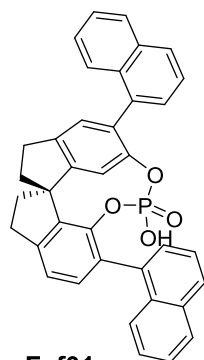

Faf01

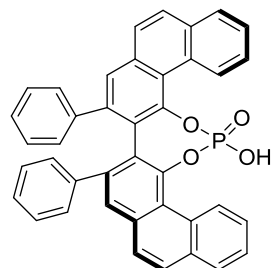

Fae01

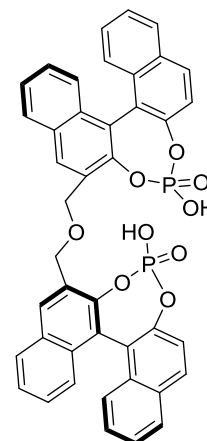

Fah01
