# Supplementary material for: MATEO: intermolecular α-amidoalkylation theoretical enantioselectivity optimization. Online tool for selection and design of chiral catalysts and products
Source: J Cheminform. 2024 Jan 23;16:9. doi: 10.1186/s13321-024-00802-7 (PMC10804835; doi:10.1186/s13321-024-00802-7)
Supplement: Supplementary file 3 — Additional file3: MATEO server reactions of reference [file 13321_2024_802_MOESM3_ESM.xlsx]

## Sheet: All
reacction_ref	Reference	ee_ref	Solvent_ref	Subs_code_ref	Nuc_code_ref	Cat_Code_ref	Prod_Code_ref	dcat	Load	Temp	Time	Smile Solvent	SMILE prod	SMILE subs	Nuc_Name_ref	SMILE nuc	Cat_Name_ref	SMILE cat	Zv_Cuns_Cat_Mean_ref	SAe_HetNoX_Cat_Mean_ref	aPolar_Cuns_Cat_Mean_ref	EA_HetNoX_Cat_Mean_ref	SAe_Het_Nuc_Mean_ref	aPolar_HetNoX_Prod_Mean_ref	EA_Csat_Prod_Mean_ref	Zv_Cuns_Solv_Mean_ref	Vvdw_All_Sub_Mean_ref
1	Org.Lett.2009, 11,4620.	96	CH2CL2	S05ae	Nuf03	Fab03	P05aeNuf03	1	10	-30	66	ClCCl	O=C(CC(C1=CC=C(C#N)C=C1)C2=CNC3=C2C=CC=C3)C4=CC=C(Cl)C=C4	OC(C1=CC=C(C#N)C=C1)C2=CNC3=C2C=CC=C3	Enamide 1c	C=C(NC(C1=CC=CC=C1)=O)C2=CC=C(Cl)C=C2	XX-R	O=P1(O)OC(C(C2=CC=CC=C2)=C3)=[C@@]([C@@]4=C(CCCC5)C5=CC(C6=CC=CC=C6)=C4O1)C7=C3CCCC7	2.22651	0.417002	1.09417	0.125071	0.266734	0.021197	0.0449314	0	21.8408
2	Org.Lett.2009, 11,4620.	96	CH2CL2	S05ak	Nuf03	Fab03	P05afNuf03	1	10	-30	66	ClCCl	O=C(CC(C1=CC=C(F)C(Cl)=C1)C2=CNC3=C2C=CC=C3)C4=CC=C(Cl)C=C4	OC(C1=CC(Cl)=C(F)C=C1)C2=CNC3=C2C=CC=C3	Enamide 1c	C=C(NC(C1=CC=CC=C1)=O)C2=CC=C(Cl)C=C2	XX-R	O=P1(O)OC(C(C2=CC=CC=C2)=C3)=[C@@]([C@@]4=C(CCCC5)C5=CC(C6=CC=CC=C6)=C4O1)C7=C3CCCC7	2.22651	0.417002	1.09417	0.125071	0.266734	0.0123957	0.0387407	0	21.8275
3	Org.Lett.2009, 11,4620.	96	CH2CL2	S05aj	Nuf03	Fab03	P05ajNuf03	1	10	-30	66	ClCCl	O=C(CC(C1=CC=C(F)C(F)=C1)C2=CNC3=C2C=CC=C3)C4=CC=C(Cl)C=C4	OC(C1=CC(F)=C(F)C=C1)C2=CNC3=C2C=CC=C3	Enamide 1c	C=C(NC(C1=CC=CC=C1)=O)C2=CC=C(Cl)C=C2	XX-R	O=P1(O)OC(C(C2=CC=CC=C2)=C3)=[C@@]([C@@]4=C(CCCC5)C5=CC(C6=CC=CC=C6)=C4O1)C7=C3CCCC7	2.22651	0.417002	1.09417	0.125071	0.266734	0.0128353	0.038941	0	21.6133
4	Angew.Chem. Int. Ed. 2012, 51,1046.	-96	CH2CL2	S04aa	Nuf11	Fba05	P04aaNuf11	-1	10	25	24	ClCCl	O=C([C@]1(C2=CNC3=C2C=CC=C3)CC(C4=CC=C(Cl)C=C4)=O)NC5=C1C=CC=C5	O=C(C1(C2=CNC3=C2C=CC=C3)O)N([H])C4=C1C=CC=C4	Enamide 5f	C=C(NC(OCC1=CC=CC=C1)=O)C2=CC=C(Cl)C=C2	VIII-S	O=P1(O)OC2=[C@]([C@]3=C(C=CC=C4)C4=CC(C5=CC=C(C=CC=C6)C6=C5)=C3O1)C7=CC=CC=C7C=C2C8=CC(C=CC=C9)=C9C=C8	3.31315	0.344834	1.5884	0.102944	0.362722	0.0260353	0.0416133	0	21.629
5	Org.Lett.2009, 11,4620.	95	CH2CL2	S05de	Nuf02	Fab03	P05deNuf02	1	10	-30	68	ClCCl	O=C(CC(C1=CC=C(C#N)C=C1)C2=CNC3=C2C=C(C)C=C3)C4=CC=CC=C4	OC(C1=CC=C(C#N)C=C1)C2=CNC3=C2C=C(C)C=C3	Enamide 1b	C=C(NC(C1=CC=CC=C1)=O)C2=CC=CC=C2	XX-R	O=P1(O)OC(C(C2=CC=CC=C2)=C3)=[C@@]([C@@]4=C(CCCC5)C5=CC(C6=CC=CC=C6)=C4O1)C7=C3CCCC7	2.22651	0.417002	1.09417	0.125071	0.198681	0.0213864	0.064138	0	21.873
6	Eur. J. Org. Chem. 2011, 3060	-95	Acetonitrile	S03ca	Nua11	Fba11	P03caNua11	-1	5	20	25	N#CC	O=C1C2=CC=CC=C2[C@@](C3=CNC4=C3C=CC=C4C)(CC)N1	OC1(CC)NC(C2=CC=CC=C21)=O	7-methyl-1H-indole	CC1=C(NC=C2)C2=CC=C1	II-S	O=P1(O)OC(C([Si](C2=CC=CC=C2)(C3=CC=CC=C3)C4=CC=CC=C4)=C5)=[C@]([C@]6=C(C=CC=C7)C7=CC([Si](C8=CC=CC=C8)(C9=CC=CC=C9)C%10=CC=CC=C%10)=C6O1)C%11=C5C=CC=C%11	3.25742	0.268405	1.38001	0.0908892	0.132215	0.0289752	0.165263	0.615385	21.5097
7	Eur. J. Org. Chem. 2011, 3060	-95	Acetonitrile	S03da	Nua11	Fba11	P03daNua11	-1	5	20	24	N#CC	O=C1C2=CC=CC=C2[C@](CCCC)(C3=CNC4=C3C=CC=C4C)N1	OC1(CCCC)NC(C2=CC=CC=C21)=O	7-methyl-1H-indole	CC1=C(NC=C2)C2=CC=C1	II-S	O=P1(O)OC(C([Si](C2=CC=CC=C2)(C3=CC=CC=C3)C4=CC=CC=C4)=C5)=[C@]([C@]6=C(C=CC=C7)C7=CC([Si](C8=CC=CC=C8)(C9=CC=CC=C9)C%10=CC=CC=C%10)=C6O1)C%11=C5C=CC=C%11	3.25742	0.268405	1.38001	0.0908892	0.132215	0.0264228	0.266222	0.615385	21.6616
8	Angew.Chem. Int. Ed. 2012, 51,1046.	-95	CH2CL2	S04fa	Nuf09	Fba05	P04faNuf09	-1	10	25	24	ClCCl	O=C([C@]1(C2=CNC3=C2C=CC(C)=C3)CC(C4=CC=CC=C4)=O)NC5=C1C=CC=C5	O=C(C1(C2=CNC3=C2C=CC(C)=C3)O)NC4=C1C=CC=C4	Enamide 5c	C=C(NC(OCC1=CC=CC=C1)=O)C2=CC=CC=C2	VIII-S	O=P1(O)OC2=[C@]([C@]3=C(C=CC=C4)C4=CC(C5=CC=C(C=CC=C6)C6=C5)=C3O1)C7=CC=CC=C7C=C2C8=CC(C=CC=C9)=C9C=C8	3.31315	0.344834	1.5884	0.102944	0.308792	0.026264	0.0597847	0	21.6732
9	Org.Lett.2009, 11,4620.	94	CH2CL2	S05ee	Nuf02	Fab03	P05eeNuf02	1	10	-30	68	ClCCl	O=C(CC(C1=CC=C(C#N)C=C1)C2=CNC3=C2C=C(OC)C=C3)C4=CC=CC=C4	OC(C1=CC=C(C#N)C=C1)C2=CNC3=C2C=C(OC)C=C3	Enamide 1b	C=C(NC(C1=CC=CC=C1)=O)C2=CC=CC=C2	XX-R	O=P1(O)OC(C(C2=CC=CC=C2)=C3)=[C@@]([C@@]4=C(CCCC5)C5=CC(C6=CC=CC=C6)=C4O1)C7=C3CCCC7	2.22651	0.417002	1.09417	0.125071	0.198681	0.0263593	0.0633516	0	21.4482
10	Org.Lett.2009, 11,4620.	94	CH2CL2	S05ae	Nuf02	Fab03	P05aeNuf02	1	10	-30	57	ClCCl	O=C(CC(C1=CC=C(C#N)C=C1)C2=CNC3=C2C=CC=C3)C4=CC=CC=C4	OC(C1=CC=C(C#N)C=C1)C2=CNC3=C2C=CC=C3	Enamide 1b	C=C(NC(C1=CC=CC=C1)=O)C2=CC=CC=C2	XX-R	O=P1(O)OC(C(C2=CC=CC=C2)=C3)=[C@@]([C@@]4=C(CCCC5)C5=CC(C6=CC=CC=C6)=C4O1)C7=C3CCCC7	2.22651	0.417002	1.09417	0.125071	0.198681	0.0222184	0.0500173	0	21.8408
11	Org.Lett.2009, 11,4620.	94	CH2CL2	S05aj	Nuf02	Fab03	P05ajNuf02	1	10	-30	57	ClCCl	O=C(CC(C1=CC=C(F)C(F)=C1)C2=CNC3=C2C=CC=C3)C4=CC=CC=C4	OC(C1=CC(F)=C(F)C=C1)C2=CNC3=C2C=CC=C3	Enamide 1b	C=C(NC(C1=CC=CC=C1)=O)C2=CC=CC=C2	XX-R	O=P1(O)OC(C(C2=CC=CC=C2)=C3)=[C@@]([C@@]4=C(CCCC5)C5=CC(C6=CC=CC=C6)=C4O1)C7=C3CCCC7	2.22651	0.417002	1.09417	0.125071	0.198681	0.0134785	0.0427044	0	21.6133
12	Org.Lett.2009, 11,4620.	94	CH2CL2	S05aj	Nuf04	Fab03	P05ajNuf04	1	10	-30	66	ClCCl	O=C(CC(C1=CC=C(F)C(F)=C1)C2=CNC3=C2C=CC=C3)C4=CC=C(C)C=C4	OC(C1=CC(F)=C(F)C=C1)C2=CNC3=C2C=CC=C3	Enamide 1d	C=C(NC(C1=CC=CC=C1)=O)C2=CC=C(C)C=C2	XX-R	O=P1(O)OC(C(C2=CC=CC=C2)=C3)=[C@@]([C@@]4=C(CCCC5)C5=CC(C6=CC=CC=C6)=C4O1)C7=C3CCCC7	2.22651	0.417002	1.09417	0.125071	0.187934	0.0129544	0.0550669	0	21.6133
13	Eur. J. Org. Chem. 2011, 3060	-94	Acetonitrile	S03ea	Nua11	Fba11	P03eaNua11	-1	5	20	60	N#CC	O=C1C2=CC=CC=C2[C@](CC=C)(C3=CNC4=C3C=CC=C4C)N1	OC1(CC=C)NC(C2=CC=CC=C21)=O	7-methyl-1H-indole	CC1=C(NC=C2)C2=CC=C1	II-S	O=P1(O)OC(C([Si](C2=CC=CC=C2)(C3=CC=CC=C3)C4=CC=CC=C4)=C5)=[C@]([C@]6=C(C=CC=C7)C7=CC([Si](C8=CC=CC=C8)(C9=CC=CC=C9)C%10=CC=CC=C%10)=C6O1)C%11=C5C=CC=C%11	3.25742	0.268405	1.38001	0.0908892	0.132215	0.0276402	0.0815632	0.615385	21.5996
14	Angew.Chem. Int. Ed. 2012, 51,1046.	-94	CH2CL2	S04aa	Nuf09	Fba05	P04aaNuf07	-1	10	25	24	ClCCl	O=C([C@]1(C2=CNC3=C2C=CC=C3)CC(C4=CC=CC=C4)=O)NC5=C1C=CC=C5	O=C(C1(C2=CNC3=C2C=CC=C3)O)N([H])C4=C1C=CC=C4	Enamide 5c	C=C(NC(OCC1=CC=CC=C1)=O)C2=CC=CC=C2	VIII-S	O=P1(O)OC2=[C@]([C@]3=C(C=CC=C4)C4=CC(C5=CC=C(C=CC=C6)C6=C5)=C3O1)C7=CC=CC=C7C=C2C8=CC(C=CC=C9)=C9C=C8	3.31315	0.344834	1.5884	0.102944	0.308792	0.027268	0.0461174	0	21.629
15	Angew.Chem. Int. Ed. 2012, 51,1046.	-94	CH2CL2	S04fe	Nuf09	Fba05	P04feNuf09	-1	10	25	24	ClCCl	O=C([C@]1(C2=CNC3=C2C=CC(C)=C3)CC(C4=CC=CC=C4)=O)NC5=C1C=C(C)C=C5	O=C(C1(C2=CNC3=C2C=CC(C)=C3)O)NC4=C1C=C(C)C=C4	Enamide 5c	C=C(NC(OCC1=CC=CC=C1)=O)C2=CC=CC=C2	VIII-S	O=P1(O)OC2=[C@]([C@]3=C(C=CC=C4)C4=CC(C5=CC=C(C=CC=C6)C6=C5)=C3O1)C7=CC=CC=C7C=C2C8=CC(C=CC=C9)=C9C=C8	3.31315	0.344834	1.5884	0.102944	0.308792	0.0253313	0.0724905	0	21.7112
16	Angew.Chem. Int. Ed. 2012, 51,1046.	-94	CH2CL2	S04fd	Nuf09	Fba05	P04fdNuf09	-1	10	25	24	ClCCl	O=C([C@]1(C2=CNC3=C2C=CC(C)=C3)CC(C4=CC=CC=C4)=O)NC5=C1C=C(F)C=C5	O=C(C1(C2=CNC3=C2C=CC(C)=C3)O)NC4=C1C=C(F)C=C4	Enamide 5c	C=C(NC(OCC1=CC=CC=C1)=O)C2=CC=CC=C2	VIII-S	O=P1(O)OC2=[C@]([C@]3=C(C=CC=C4)C4=CC(C5=CC=C(C=CC=C6)C6=C5)=C3O1)C7=CC=CC=C7C=C2C8=CC(C=CC=C9)=C9C=C8	3.31315	0.344834	1.5884	0.102944	0.308792	0.0259599	0.0544402	0	21.5238
17	Angew.Chem. Int. Ed. 2012, 51,1046.	-94	CH2CL2	S04aa	Nuf09	Fba05	P04aaNuf07	-1	10	25	24	ClCCl	O=C([C@]1(C2=CNC3=C2C=CC=C3)CC(C4=CC=CC=C4)=O)NC5=C1C=CC=C5	O=C(C1(C2=CNC3=C2C=CC=C3)O)N([H])C4=C1C=CC=C4	Enamide 5c	C=C(NC(OCC1=CC=CC=C1)=O)C2=CC=CC=C2	VIII-S	O=P1(O)OC2=[C@]([C@]3=C(C=CC=C4)C4=CC(C5=CC=C(C=CC=C6)C6=C5)=C3O1)C7=CC=CC=C7C=C2C8=CC(C=CC=C9)=C9C=C8	3.31315	0.344834	1.5884	0.102944	0.308792	0.027268	0.0461174	0	21.629
18	Angew.Chem. Int. Ed. 2012, 51,1046.	-94	CH2CL2	S04ha	Nuf09	Fba05	P04haNuf09	-1	10	25	24	ClCCl	O=C([C@]1(C2=CNC3=C2C=CC(F)=C3)CC(C4=CC=CC=C4)=O)NC5=C1C=CC=C5	O=C(C1(C2=CNC3=C2C=CC(F)=C3)O)NC4=C1C=CC=C4	Enamide 5c	C=C(NC(OCC1=CC=CC=C1)=O)C2=CC=CC=C2	VIII-S	O=P1(O)OC2=[C@]([C@]3=C(C=CC=C4)C4=CC(C5=CC=C(C=CC=C6)C6=C5)=C3O1)C7=CC=CC=C7C=C2C8=CC(C=CC=C9)=C9C=C8	3.31315	0.344834	1.5884	0.102944	0.308792	0.0269404	0.0418531	0	21.4731
19	Org.Lett.2009, 11,4620.	93	CH2CL2	S05al	Nuf03	Fab03	P05alNuf03	1	10	-30	66	ClCCl	O=C(CC(C1=CC(C=CC=C2)=C2C=C1)C3=CNC4=C3C=CC=C4)C5=CC=C(Cl)C=C5	OC(C1=CC=C(C=CC=C2)C2=C1)C3=CNC4=C3C=CC=C4	Enamide 1c	C=C(NC(C1=CC=CC=C1)=O)C2=CC=C(Cl)C=C2	XX-R	O=P1(O)OC(C(C2=CC=CC=C2)=C3)=[C@@]([C@@]4=C(CCCC5)C5=CC(C6=CC=CC=C6)=C4O1)C7=C3CCCC7	2.22651	0.417002	1.09417	0.125071	0.266734	0.0113627	0.0406773	0	22.0723
20	Org.Lett.2009, 11,4620.	93	CH2CL2	S05ae	Nuf04	Fab03	P05aeNuf04	1	10	-30	66	ClCCl	O=C(CC(C1=CC=C(C#N)C=C1)C2=CNC3=C2C=CC=C3)C4=CC=C(C)C=C4	OC(C1=CC=C(C#N)C=C1)C2=CNC3=C2C=CC=C3	Enamide 1d	C=C(NC(C1=CC=CC=C1)=O)C2=CC=C(C)C=C2	XX-R	O=P1(O)OC(C(C2=CC=CC=C2)=C3)=[C@@]([C@@]4=C(CCCC5)C5=CC(C6=CC=CC=C6)=C4O1)C7=C3CCCC7	2.22651	0.417002	1.09417	0.125071	0.187934	0.0213864	0.064138	0	21.8408
21	Angew.Chem. Int. Ed. 2012, 51,1046.	-93	CH2CL2	S04aa	Nuf09	Fba05	P04aaNuf07	-1	10	25	24	ClCCl	O=C([C@]1(C2=CNC3=C2C=CC=C3)CC(C4=CC=CC=C4)=O)NC5=C1C=CC=C5	O=C(C1(C2=CNC3=C2C=CC=C3)O)N([H])C4=C1C=CC=C4	Enamide 5c	C=C(NC(OCC1=CC=CC=C1)=O)C2=CC=CC=C2	VIII-S	O=P1(O)OC2=[C@]([C@]3=C(C=CC=C4)C4=CC(C5=CC=C(C=CC=C6)C6=C5)=C3O1)C7=CC=CC=C7C=C2C8=CC(C=CC=C9)=C9C=C8	3.31315	0.344834	1.5884	0.102944	0.308792	0.027268	0.0461174	0	21.629
22	Angew.Chem. Int. Ed. 2012, 51,1046.	-93	CH2CL2	S04ga	Nuf09	Fba05	P04gaNuf09	-1	10	25	24	ClCCl	O=C([C@]1(C2=CNC3=C2C=C(F)C=C3)CC(C4=CC=CC=C4)=O)NC5=C1C=CC=C5	O=C(C1(C2=CNC3=C2C=C(F)C=C3)O)NC4=C1C=CC=C4	Enamide 5c	C=C(NC(OCC1=CC=CC=C1)=O)C2=CC=CC=C2	VIII-S	O=P1(O)OC2=[C@]([C@]3=C(C=CC=C4)C4=CC(C5=CC=C(C=CC=C6)C6=C5)=C3O1)C7=CC=CC=C7C=C2C8=CC(C=CC=C9)=C9C=C8	3.31315	0.344834	1.5884	0.102944	0.308792	0.0269404	0.0418531	0	21.4726
23	Org.Lett.2009, 11,4620.	92	CH2CL2	S05ad	Nuf02	Fab03	P05adNuf02	1	10	-30	51	ClCCl	O=C(CC(C1=CC=C(Br)C=C1)C2=CNC3=C2C=CC=C3)C4=CC=CC=C4	OC(C1=CC=C(Br)C=C1)C2=CNC3=C2C=CC=C3	Enamide 1b	C=C(NC(C1=CC=CC=C1)=O)C2=CC=CC=C2	XX-R	O=P1(O)OC(C(C2=CC=CC=C2)=C3)=[C@@]([C@@]4=C(CCCC5)C5=CC(C6=CC=CC=C6)=C4O1)C7=C3CCCC7	2.22651	0.417002	1.09417	0.125071	0.198681	0.0129059	0.0470293	0	22.415
24	Org.Lett.2009, 11,4620.	92	CH2CL2	S05aa	Nuf02	Fab03	P05aaNuf01	1	10	-30	51	ClCCl	O=C(CC(C1=CC=CC=C1)C2=CNC3=C2C=CC=C3)C4=CC=CC=C4	OC(C1=CC=CC=C1)C2=CNC3=C2C=CC=C3	Enamide 1b	C=C(NC(C1=CC=CC=C1)=O)C2=CC=CC=C2	XX-R	O=P1(O)OC(C(C2=CC=CC=C2)=C3)=[C@@]([C@@]4=C(CCCC5)C5=CC(C6=CC=CC=C6)=C4O1)C7=C3CCCC7	2.22651	0.417002	1.09417	0.125071	0.198681	0.0138347	0.0522023	0	21.9791
25	Org.Lett.2009, 11,4620.	92	CH2CL2	S05ab	Nuf02	Fab03	P05abNuf02	1	10	-30	57	ClCCl	O=C(CC(C1=CC=C(C)C=C1)C2=CNC3=C2C=CC=C3)C4=CC=CC=C4	OC(C1=CC=C(C)C=C1)C2=CNC3=C2C=CC=C3	Enamide 1b	C=C(NC(C1=CC=CC=C1)=O)C2=CC=CC=C2	XX-R	O=P1(O)OC(C(C2=CC=CC=C2)=C3)=[C@@]([C@@]4=C(CCCC5)C5=CC(C6=CC=CC=C6)=C4O1)C7=C3CCCC7	2.22651	0.417002	1.09417	0.125071	0.198681	0.0132831	0.0668287	0	22.0064
26	Org.Lett.2009, 11,4620.	92	CH2CL2	S05ab	Nuf03	Fab03	P05abNuf03	1	10	-30	60	ClCCl	O=C(CC(C1=CC=C(C)C=C1)C2=CNC3=C2C=CC=C3)C4=CC=C(Cl)C=C4	OC(C1=CC=C(C)C=C1)C2=CNC3=C2C=CC=C3	Enamide 1c	C=C(NC(C1=CC=CC=C1)=O)C2=CC=C(Cl)C=C2	XX-R	O=P1(O)OC(C(C2=CC=CC=C2)=C3)=[C@@]([C@@]4=C(CCCC5)C5=CC(C6=CC=CC=C6)=C4O1)C7=C3CCCC7	2.22651	0.417002	1.09417	0.125071	0.266734	0.0126579	0.0600193	0	22.0064
27	Org.Lett.2009, 11,4620.	92	CH2CL2	S05ak	Nuf04	Fab03	P05akNuf04	1	10	-30	66	ClCCl	O=C(CC(C1=CC=C(F)C(Cl)=C1)C2=CNC3=C2C=CC=C3)C4=CC=C(C)C=C4	OC(C1=CC(Cl)=C(F)C=C1)C2=CNC3=C2C=CC=C3	Enamide 1d	C=C(NC(C1=CC=CC=C1)=O)C2=CC=C(C)C=C2	XX-R	O=P1(O)OC(C(C2=CC=CC=C2)=C3)=[C@@]([C@@]4=C(CCCC5)C5=CC(C6=CC=CC=C6)=C4O1)C7=C3CCCC7	2.22651	0.417002	1.09417	0.125071	0.187934	0.0125067	0.0547665	0	21.8275
28	Angew.Chem. Int. Ed. 2012, 51,1046.	-92	CH2CL2	S04hd	Nuf09	Fba05	P04hdNuf09	-1	10	25	24	ClCCl	O=C([C@]1(C2=CNC3=C2C=C(F)C=C3)CC(C4=CC=CC=C4)=O)NC5=C1C=C(F)C=C5	O=C(C1(C2=CNC3=C2C=C(F)C=C3)O)NC4=C1C=C(F)C=C4	Enamide 5c	C=C(NC(OCC1=CC=CC=C1)=O)C2=CC=CC=C2	VIII-S	O=P1(O)OC2=[C@]([C@]3=C(C=CC=C4)C4=CC(C5=CC=C(C=CC=C6)C6=C5)=C3O1)C7=CC=CC=C7C=C2C8=CC(C=CC=C9)=C9C=C8	3.31315	0.344834	1.5884	0.102944	0.308792	0.0266205	0.0383107	0	21.323
29	Angew.Chem. Int. Ed. 2012, 51,1046.	-92	CH2CL2	S04ea	Nuf09	Fba05	P04eaNuf09	-1	10	25	24	ClCCl	O=C([C@]1(C2=CNC3=C2C=C(Cl)C=C3)CC(C4=CC=CC=C4)=O)NC5=C1C=CC=C5	O=C(C1(C2=CNC3=C2C=C(Cl)C=C3)O)NC4=C1C=CC=C4	Enamide 5c	C=C(NC(OCC1=CC=CC=C1)=O)C2=CC=CC=C2	VIII-S	O=P1(O)OC2=[C@]([C@]3=C(C=CC=C4)C4=CC(C5=CC=C(C=CC=C6)C6=C5)=C3O1)C7=CC=CC=C7C=C2C8=CC(C=CC=C9)=C9C=C8	3.31315	0.344834	1.5884	0.102944	0.308792	0.0260353	0.0416133	0	21.6713
30	Angew.Chem. Int. Ed. 2012, 51,1046.	-92	CH2CL2	S04ad	Nuf09	Fba05	P04adNuf09	-1	10	25	24	ClCCl	O=C([C@]1(C2=CNC3=C2C=CC=C3)CC(C4=CC=CC=C4)=O)NC5=C1C=C(F)C=C5	O=C(C1(C2=CNC3=C2C=CC=C3)O)NC4=C1C=C(F)C=C4	Enamide 5c	C=C(NC(OCC1=CC=CC=C1)=O)C2=CC=CC=C2	VIII-S	O=P1(O)OC2=[C@]([C@]3=C(C=CC=C4)C4=CC(C5=CC=C(C=CC=C6)C6=C5)=C3O1)C7=CC=CC=C7C=C2C8=CC(C=CC=C9)=C9C=C8	3.31315	0.344834	1.5884	0.102944	0.308792	0.0269404	0.0418531	0	21.4726
31	Angew.Chem. Int. Ed. 2012, 51,1046.	-92	CH2CL2	S04ae	Nuf09	Fba05	P04aeNuf09	-1	10	25	24	ClCCl	O=C([C@]1(C2=CNC3=C2C=CC=C3)CC(C4=CC=CC=C4)=O)NC5=C1C=C(C)C=C5	O=C(C1(C2=CNC3=C2C=CC=C3)O)NC4=C1C=C(C)C=C4	Enamide 5c	C=C(NC(OCC1=CC=CC=C1)=O)C2=CC=CC=C2	VIII-S	O=P1(O)OC2=[C@]([C@]3=C(C=CC=C4)C4=CC(C5=CC=C(C=CC=C6)C6=C5)=C3O1)C7=CC=CC=C7C=C2C8=CC(C=CC=C9)=C9C=C8	3.31315	0.344834	1.5884	0.102944	0.308792	0.026264	0.0597847	0	21.6713
32	Org.Lett.2009, 11,4620.	91	CH2CL2	S05ac	Nuf02	Fab03	P05acNuf02	1	10	-30	64	ClCCl	O=C(CC(C1=CC=C(Cl)C=C1)C2=CNC3=C2C=CC=C3)C4=CC=CC=C4	OC(C1=CC=C(Cl)C=C1)C2=CNC3=C2C=CC=C3	Enamide 1b	C=C(NC(C1=CC=CC=C1)=O)C2=CC=CC=C2	XX-R	O=P1(O)OC(C(C2=CC=CC=C2)=C3)=[C@@]([C@@]4=C(CCCC5)C5=CC(C6=CC=CC=C6)=C4O1)C7=C3CCCC7	2.22651	0.417002	1.09417	0.125071	0.198681	0.0131579	0.0466868	0	22.0064
33	Org.Lett.2009, 11,4620.	91	CH2CL2	S05ai	Nuf02	Fab03	P05aiNuf02	1	10	-30	51	ClCCl	O=C(CC(C1=CC=CC(C#N)=C1)C2=CNC3=C2C=CC=C3)C4=CC=CC=C4	OC(C1=CC(C#N)=CC=C1)C2=CNC3=C2C=CC=C3	Enamide 1b	C=C(NC(C1=CC=CC=C1)=O)C2=CC=CC=C2	XX-R	O=P1(O)OC(C(C2=CC=CC=C2)=C3)=[C@@]([C@@]4=C(CCCC5)C5=CC(C6=CC=CC=C6)=C4O1)C7=C3CCCC7	2.22651	0.417002	1.09417	0.125071	0.198681	0.0222184	0.0500173	0	21.8408
34	Org.Lett.2009, 11,4620.	91	CH2CL2	S05aa	Nuf02	Faa06	P05aaNuf01	1	10	-20	34	ClCCl	O=C(CC(C1=CC=CC=C1)C2=CNC3=C2C=CC=C3)C4=CC=CC=C4	OC(C1=CC=CC=C1)C2=CNC3=C2C=CC=C3	Enamide 1b	C=C(NC(C1=CC=CC=C1)=O)C2=CC=CC=C2	VIa-R	O=P1(O)OC(C(C2=CC=CC=C2)=C3)=[C@@]([C@@]4=C(C=CC=C5)C5=CC(C6=CC=CC=C6)=C4O1)C7=C3C=CC=C7	3.17316	0.417002	1.55014	0.125071	0.198681	0.0138347	0.0522023	0	21.9791
35	Org.Lett.2009, 11,4620.	91	CH2CL2	S05aa	Nuf02	Faa06	P05aaNuf01	1	10	-30	34	ClCCl	O=C(CC(C1=CC=CC=C1)C2=CNC3=C2C=CC=C3)C4=CC=CC=C4	OC(C1=CC=CC=C1)C2=CNC3=C2C=CC=C3	Enamide 1b	C=C(NC(C1=CC=CC=C1)=O)C2=CC=CC=C2	VIa-R	O=P1(O)OC(C(C2=CC=CC=C2)=C3)=[C@@]([C@@]4=C(C=CC=C5)C5=CC(C6=CC=CC=C6)=C4O1)C7=C3C=CC=C7	3.17316	0.417002	1.55014	0.125071	0.198681	0.0138347	0.0522023	0	21.9791
36	Angew.Chem. Int. Ed. 2012, 51,1046.	-91	CH2CL2	S04da	Nuf09	Fba05	P04daNuf09	-1	10	25	24	ClCCl	O=C([C@]1(C2=CNC3=C2C=C(OC)C=C3)CC(C4=CC=CC=C4)=O)NC5=C1C=CC=C5	O=C(C1(C2=CNC3=C2C=C(OC)C=C3)O)NC4=C1C=CC=C4	Enamide 5c	C=C(NC(OCC1=CC=CC=C1)=O)C2=CC=CC=C2	VIII-S	O=P1(O)OC2=[C@]([C@]3=C(C=CC=C4)C4=CC(C5=CC=C(C=CC=C6)C6=C5)=C3O1)C7=CC=CC=C7C=C2C8=CC(C=CC=C9)=C9C=C8	3.31315	0.344834	1.5884	0.102944	0.308792	0.0310748	0.0592064	0	21.2625
37	Angew.Chem. Int. Ed. 2012, 51,1046.	-91	CH2CL2	S04aa	Nuf10	Fba05	P04aaNuf10	-1	10	25	24	ClCCl	O=C([C@]1(C2=CNC3=C2C=CC=C3)CC(C4=CC=C(C)C=C4)=O)NC5=C1C=CC=C5	O=C(C1(C2=CNC3=C2C=CC=C3)O)N([H])C4=C1C=CC=C4	Enamide 5e	C=C(NC(OCC1=CC=CC=C1)=O)C2=CC=C(C)C=C2	VIII-S	O=P1(O)OC2=[C@]([C@]3=C(C=CC=C4)C4=CC(C5=CC=C(C=CC=C6)C6=C5)=C3O1)C7=CC=CC=C7C=C2C8=CC(C=CC=C9)=C9C=C8	3.31315	0.344834	1.5884	0.102944	0.293957	0.026264	0.0597847	0	21.629
38	Org.Lett.2009, 11,4620.	90	CH2CL2	S05ag	Nuf02	Fab03	P05agNuf02	1	10	-30	48	ClCCl	O=C(CC(C1=CC=CC(F)=C1)C2=CNC3=C2C=CC=C3)C4=CC=CC=C4	OC(C1=CC(F)=CC=C1)C2=CNC3=C2C=CC=C3	Enamide 1b	C=C(NC(C1=CC=CC=C1)=O)C2=CC=CC=C2	XX-R	O=P1(O)OC(C(C2=CC=CC=C2)=C3)=[C@@]([C@@]4=C(CCCC5)C5=CC(C6=CC=CC=C6)=C4O1)C7=C3CCCC7	2.22651	0.417002	1.09417	0.125071	0.198681	0.0136543	0.0469781	0	21.7933
39	Org.Lett.2009, 11,4620.	90	CH2CL2	S05ah	Nuf02	Fab03	P05ahNuf02	1	10	-30	57	ClCCl	O=C(CC(C1=CC=CC([N+]([O-])=O)=C1)C2=CNC3=C2C=CC=C3)C4=CC=CC=C4	OC(C1=CC([N+]([O-])=O)=CC=C1)C2=CNC3=C2C=CC=C3	Enamide 1b	C=C(NC(C1=CC=CC=C1)=O)C2=CC=CC=C2	XX-R	O=P1(O)OC(C(C2=CC=CC=C2)=C3)=[C@@]([C@@]4=C(CCCC5)C5=CC(C6=CC=CC=C6)=C4O1)C7=C3CCCC7	2.22651	0.417002	1.09417	0.125071	0.198681	0.0535733	0.0475461	0	21.3086
40	Org.Lett.2009, 11,4620.	90	CH2CL2	S05ab	Nuf04	Fab03	P05abNuf04	1	10	-30	60	ClCCl	O=C(CC(C1=CC=C(C)C=C1)C2=CNC3=C2C=CC=C3)C4=CC=C(C)C=C4	OC(C1=CC=C(C)C=C1)C2=CNC3=C2C=CC=C3	Enamide 1d	C=C(NC(C1=CC=CC=C1)=O)C2=CC=C(C)C=C2	XX-R	O=P1(O)OC(C(C2=CC=CC=C2)=C3)=[C@@]([C@@]4=C(CCCC5)C5=CC(C6=CC=CC=C6)=C4O1)C7=C3CCCC7	2.22651	0.417002	1.09417	0.125071	0.187934	0.0127737	0.0803391	0	22.0064
41	Org.Lett.2009, 11,4620.	90	CH2CL2	S05ak	Nuf02	Fab03	P05akNuf02	1	10	-30	48	ClCCl	O=C(CC(C1=CC=C(F)C(Cl)=C1)C2=CNC3=C2C=CC=C3)C4=CC=CC=C4	OC(C1=CC(Cl)=C(F)C=C1)C2=CNC3=C2C=CC=C3	Enamide 1b	C=C(NC(C1=CC=CC=C1)=O)C2=CC=CC=C2	XX-R	O=P1(O)OC(C(C2=CC=CC=C2)=C3)=[C@@]([C@@]4=C(CCCC5)C5=CC(C6=CC=CC=C6)=C4O1)C7=C3CCCC7	2.22651	0.417002	1.09417	0.125071	0.198681	0.0129946	0.0424636	0	21.8275
42	Org.Lett.2009, 11,4620.	90	CH2CL2	S05al	Nuf02	Fab03	P05alNuf02	1	10	-30	48	ClCCl	O=C(CC(C1=CC(C=CC=C2)=C2C=C1)C3=CNC4=C3C=CC=C4)C5=CC=CC=C5	OC(C1=CC=C(C=CC=C2)C2=C1)C3=CNC4=C3C=CC=C4	Enamide 1b	C=C(NC(C1=CC=CC=C1)=O)C2=CC=CC=C2	XX-R	O=P1(O)OC(C(C2=CC=CC=C2)=C3)=[C@@]([C@@]4=C(CCCC5)C5=CC(C6=CC=CC=C6)=C4O1)C7=C3CCCC7	2.22651	0.417002	1.09417	0.125071	0.198681	0.0118639	0.0448015	0	22.0723
43	Org.Lett.2009, 11,4620.	90	CH2CL2	S05af	Nuf02	Faa06	P05afNuf02	1	10	-30	56	ClCCl	O=C(CC(C1=CC=C(C(F)(F)F)C=C1)C2=CNC3=C2C=CC=C3)C4=CC=CC=C4	OC(C1=CC=C(C(F)(F)F)C=C1)C2=CNC3=C2C=CC=C3	Enamide 1b	C=C(NC(C1=CC=CC=C1)=O)C2=CC=CC=C2	VIa-R	O=P1(O)OC(C(C2=CC=CC=C2)=C3)=[C@@]([C@@]4=C(C=CC=C5)C5=CC(C6=CC=CC=C6)=C4O1)C7=C3C=CC=C7	3.17316	0.417002	1.55014	0.125071	0.198681	0.012796	0.0562392	0	21.4587
44	Eur. J. Org. Chem. 2011, 3060	-90	Acetonitrile	S03ca	Nua02	Fba11	P03caNua02	-1	5	20	30	N#CC	O=C1C2=CC=CC=C2[C@@](C3=CNC4=C3C=CC=C4OC)(CC)N1	OC1(CC)NC(C2=CC=CC=C21)=O	7-methoxy-1H-indole	COC1=C(NC=C2)C2=CC=C1	II-S	O=P1(O)OC(C([Si](C2=CC=CC=C2)(C3=CC=CC=C3)C4=CC=CC=C4)=C5)=[C@]([C@]6=C(C=CC=C7)C7=CC([Si](C8=CC=CC=C8)(C9=CC=CC=C9)C%10=CC=CC=C%10)=C6O1)C%11=C5C=CC=C%11	3.25742	0.268405	1.38001	0.0908892	0.307016	0.0356902	0.158798	0.615385	21.5097
45	Angew.Chem. Int. Ed. 2012, 51,1046.	-90	CH2CL2	S04ac	Nuf07	Fba05	P04acNuf07	-1	10	25	24	ClCCl	O=C([C@]1(C2=CNC3=C2C=CC=C3)CC(C4=CC=CC=C4)=O)N(C(OC(C)(C)C)=O)C5=C1C=CC=C5	O=C(C1(C2=CNC3=C2C=CC=C3)O)N(C(OC(C)(C)C)=O)C4=C1C=CC=C4	Enamide 5a	C=C(NC(OC)=O)C1=CC=CC=C1	VIII-S	O=P1(O)OC2=[C@]([C@]3=C(C=CC=C4)C4=CC(C5=CC=C(C=CC=C6)C6=C5)=C3O1)C7=CC=CC=C7C=C2C8=CC(C=CC=C9)=C9C=C8	3.31315	0.344834	1.5884	0.102944	0.461744	0.0338763	0.166675	0	21.3648
46	Angew.Chem. Int. Ed. 2012, 51,1046.	-90	CH2CL2	S04aa	Nuf07	Fba05	P04aaNuf07	-1	10	25	24	ClCCl	O=C([C@]1(C2=CNC3=C2C=CC=C3)CC(C4=CC=CC=C4)=O)NC5=C1C=CC=C5	O=C(C1(C2=CNC3=C2C=CC=C3)O)N([H])C4=C1C=CC=C4	Enamide 5a	C=C(NC(OC)=O)C1=CC=CC=C1	VIII-S	O=P1(O)OC2=[C@]([C@]3=C(C=CC=C4)C4=CC(C5=CC=C(C=CC=C6)C6=C5)=C3O1)C7=CC=CC=C7C=C2C8=CC(C=CC=C9)=C9C=C8	3.31315	0.344834	1.5884	0.102944	0.461744	0.027268	0.0461174	0	21.629
47	Angew.Chem. Int. Ed. 2012, 51,1046.	-90	CH2CL2	S04ca	Nuf09	Fba05	P04caNuf09	-1	10	25	24	ClCCl	O=C([C@]1(C2=CNC3=C2C=C(Br)C=C3)CC(C4=CC=CC=C4)=O)NC5=C1C=CC=C5	O=C(C1(C2=CNC3=C2C=C(Br)C=C3)O)NC4=C1C=CC=C4	Enamide 5c	C=C(NC(OCC1=CC=CC=C1)=O)C2=CC=CC=C2	VIII-S	O=P1(O)OC2=[C@]([C@]3=C(C=CC=C4)C4=CC(C5=CC=C(C=CC=C6)C6=C5)=C3O1)C7=CC=CC=C7C=C2C8=CC(C=CC=C9)=C9C=C8	3.31315	0.344834	1.5884	0.102944	0.308792	0.0255739	0.0418953	0	22.0371
48	Org. Lett. 2013, 15, 2688.	-90	Dioxane	S06ia	Nuc09	Fba11	P06iaNuc01	-1	5	25	24	C1COCCO1	O=C1C2=C(C=CC=C2)C(N1CC3)([H])C4=C3C5=C(N4)C=C(Br)C=C5	O=C1C2=C(C=CC=C2)C(N1CC3)(O)C4=C3C5=C(N4)C=C(Br)C=C5	di-tert-butyl 2,6-dimethyl-1,4-dihydropyridine-3,5-dicarboxylate	O=C(C1=C(C)NC(C)=C(C(OC(C)(C)C)=O)C1)OC(C)(C)C	II-S	O=P1(O)OC2=[C@]([C@]3=C(C=CC=C4)C4=CC([Si](C5=CC=CC=C5)(C6=CC=CC=C6)C7=CC=CC=C7)=C3O1)C8=CC=CC=C8C=C2[Si](C9=CC=CC=C9)(C%10=CC=CC=C%10)C%11=CC=CC=C%11	3.25742	0.268405	1.38001	0.0908892	0.388593	0.0283622	0.102757	0	22.0229
49	Angew.Chem. Int. Ed. 2012, 51,1046.	-89	CH2CL2	S04ab	Nuf07	Fba05	P04abNuf07	-1	10	25	24	ClCCl	O=C([C@]1(C2=CNC3=C2C=CC=C3)CC(C4=CC=CC=C4)=O)N(CC5=CC=CC=C5)C6=C1C=CC=C6	O=C(C1(C2=CNC3=C2C=CC=C3)O)N(CC4=CC=CC=C4)C5=C1C=CC=C5	Enamide 5a	C=C(NC(OC)=O)C1=CC=CC=C1	VIII-S	O=P1(O)OC2=[C@]([C@]3=C(C=CC=C4)C4=CC(C5=CC=C(C=CC=C6)C6=C5)=C3O1)C7=CC=CC=C7C=C2C8=CC(C=CC=C9)=C9C=C8	3.31315	0.344834	1.5884	0.102944	0.461744	0.0215735	0.0491525	0	21.7938
50	Angew.Chem. Int. Ed. 2012, 51,1046.	-89	Et2O	S04aa	Nuf07	Fba05	P04aaNuf07	-1	10	25	24	CCOCC	O=C([C@]1(C2=CNC3=C2C=CC=C3)CC(C4=CC=CC=C4)=O)NC5=C1C=CC=C5	O=C(C1(C2=CNC3=C2C=CC=C3)O)N([H])C4=C1C=CC=C4	Enamide 5a	C=C(NC(OC)=O)C1=CC=CC=C1	VIII-S	O=P1(O)OC2=[C@]([C@]3=C(C=CC=C4)C4=CC(C5=CC=C(C=CC=C6)C6=C5)=C3O1)C7=CC=CC=C7C=C2C8=CC(C=CC=C9)=C9C=C8	3.31315	0.344834	1.5884	0.102944	0.461744	0.027268	0.0461174	0	21.629
51	Org.Lett.2009, 11,4620.	88	CH2CL2	S05be	Nuf02	Fab03	P05beNuf02	1	10	-30	68	ClCCl	O=C(CC(C1=CC=C(C#N)C=C1)C2=CNC3=C2C=C(Cl)C=C3)C4=CC=CC=C4	OC(C1=CC=C(C#N)C=C1)C2=CNC3=C2C=C(Cl)C=C3	Enamide 1b	C=C(NC(C1=CC=CC=C1)=O)C2=CC=CC=C2	XX-R	O=P1(O)OC(C(C2=CC=CC=C2)=C3)=[C@@]([C@@]4=C(CCCC5)C5=CC(C6=CC=CC=C6)=C4O1)C7=C3CCCC7	2.22651	0.417002	1.09417	0.125071	0.198681	0.021197	0.0449314	0	21.873
52	Angew.Chem. Int. Ed. 2012, 51,1046.	-88	1,2-dichloroethane	S04aa	Nuf07	Fba05	P04aaNuf07	-1	10	25	24	ClCCCl	O=C([C@]1(C2=CNC3=C2C=CC=C3)CC(C4=CC=CC=C4)=O)NC5=C1C=CC=C5	O=C(C1(C2=CNC3=C2C=CC=C3)O)N([H])C4=C1C=CC=C4	Enamide 5a	C=C(NC(OC)=O)C1=CC=CC=C1	VIII-S	O=P1(O)OC2=[C@]([C@]3=C(C=CC=C4)C4=CC(C5=CC=C(C=CC=C6)C6=C5)=C3O1)C7=CC=CC=C7C=C2C8=CC(C=CC=C9)=C9C=C8	3.31315	0.344834	1.5884	0.102944	0.461744	0.027268	0.0461174	0	21.629
53	Eur. J. Org. Chem. 2011, 3060	-87	Acetonitrile	S03ca	Nua22	Fba11	P03caNua22	-1	5	20	37	N#CC	O=C1C2=CC=CC=C2[C@@](C3=CNC4=C3C=CC=C4OCC5=CC=CC=C5)(CC)N1	OC1(CC)NC(C2=CC=CC=C21)=O	7-(benzyloxy)-1H-indole	C1(OCC2=CC=CC=C2)=C(NC=C3)C3=CC=C1	II-S	O=P1(O)OC(C([Si](C2=CC=CC=C2)(C3=CC=CC=C3)C4=CC=CC=C4)=C5)=[C@]([C@]6=C(C=CC=C7)C7=CC([Si](C8=CC=CC=C8)(C9=CC=CC=C9)C%10=CC=CC=C%10)=C6O1)C%11=C5C=CC=C%11	3.25742	0.268405	1.38001	0.0908892	0.186797	0.0266549	0.123172	0.615385	21.5097
54	Angew.Chem. Int. Ed. 2012, 51,1046.	-87	CH2CL2	S04aa	Nuf08	Fba05	P04aaNuf07	-1	10	25	24	ClCCl	O=C([C@]1(C2=CNC3=C2C=CC=C3)CC(C4=CC=CC=C4)=O)NC5=C1C=CC=C5	O=C(C1(C2=CNC3=C2C=CC=C3)O)N([H])C4=C1C=CC=C4	Enamide 5b	C=C(NC(OCC)=O)C1=CC=CC=C1	VIII-S	O=P1(O)OC2=[C@]([C@]3=C(C=CC=C4)C4=CC(C5=CC=C(C=CC=C6)C6=C5)=C3O1)C7=CC=CC=C7C=C2C8=CC(C=CC=C9)=C9C=C8	3.31315	0.344834	1.5884	0.102944	0.413012	0.027268	0.0461174	0	21.629
55	Eur. J. Org. Chem. 2011, 3060	-86	Acetonitrile	S03ea	Nua02	Fba11	P03eaNua02	-1	5	20	66	N#CC	O=C1C2=CC=CC=C2[C@](CC=C)(C3=CNC4=C3C=CC=C4OC)N1	OC1(CC=C)NC(C2=CC=CC=C21)=O	7-methoxy-1H-indole	COC1=C(NC=C2)C2=CC=C1	II-S	O=P1(O)OC(C([Si](C2=CC=CC=C2)(C3=CC=CC=C3)C4=CC=CC=C4)=C5)=[C@]([C@]6=C(C=CC=C7)C7=CC([Si](C8=CC=CC=C8)(C9=CC=CC=C9)C%10=CC=CC=C%10)=C6O1)C%11=C5C=CC=C%11	3.25742	0.268405	1.38001	0.0908892	0.307016	0.0340795	0.0797029	0.615385	21.5996
56	Eur. J. Org. Chem. 2011, 3060	-86	Acetonitrile	S03ca	Nua23	Fba11	P03caNua23	-1	5	20	34	N#CC	O=C1C2=CC=CC=C2[C@@](C3=CNC4=C3C=CC(OCC5=CC=CC=C5)=C4)(CC)N1	OC1(CC)NC(C2=CC=CC=C21)=O	6-(benzyloxy)-1H-indole	C1(OCC2=CC=CC=C2)=CC=C3C(NC=C3)=C1	II-S	O=P1(O)OC(C([Si](C2=CC=CC=C2)(C3=CC=CC=C3)C4=CC=CC=C4)=C5)=[C@]([C@]6=C(C=CC=C7)C7=CC([Si](C8=CC=CC=C8)(C9=CC=CC=C9)C%10=CC=CC=C%10)=C6O1)C%11=C5C=CC=C%11	3.25742	0.268405	1.38001	0.0908892	0.179637	0.0262693	0.123172	0.615385	21.5097
57	Angew.Chem. Int. Ed. 2012, 51,1046.	-86	CH2CL2	S04aa	Nuf07	Faa14	P04aaNuf07	-1	10	25	24	ClCCl	O=C([C@]1(C2=CNC3=C2C=CC=C3)CC(C4=CC=CC=C4)=O)NC5=C1C=CC=C5	O=C(C1(C2=CNC3=C2C=CC=C3)O)N([H])C4=C1C=CC=C4	Enamide 5a	C=C(NC(OC)=O)C1=CC=CC=C1	XXIV-S	O=P1(O)OC2=[C@]([C@]3=C(C=CC=C4)C4=CC(C5=CC=C(C6=CC=CC=C6)C=C5)=C3O1)C7=CC=CC=C7C=C2C8=CC=C(C9=CC=CC=C9)C=C8	3.36676	0.317371	1.60274	0.0945774	0.461744	0.027268	0.0461174	0	21.629
58	Org.Lett.2009, 11,4620.	85	CH2CL2	S05ce	Nuf02	Fab03	P05ceNuf02	1	10	-30	68	ClCCl	O=C(CC(C1=CC=C(C#N)C=C1)C2=CNC3=C2C=C(Br)C=C3)C4=CC=CC=C4	OC(C1=CC=C(C#N)C=C1)C2=CNC3=C2C=C(Br)C=C3	Enamide 1b	C=C(NC(C1=CC=CC=C1)=O)C2=CC=CC=C2	XX-R	O=P1(O)OC(C(C2=CC=CC=C2)=C3)=[C@@]([C@@]4=C(CCCC5)C5=CC(C6=CC=CC=C6)=C4O1)C7=C3CCCC7	2.22651	0.417002	1.09417	0.125071	0.198681	0.0208151	0.0452485	0	22.2445
59	Eur. J. Org. Chem. 2011, 3060	-85	Acetonitrile	S03da	Nua02	Fba11	P03daNua02	-1	5	20	24	N#CC	O=C1C2=CC=CC=C2[C@](CCCC)(C3=CNC4=C3C=CC=C4OC)N1	OC1(CCCC)NC(C2=CC=CC=C21)=O	7-methoxy-1H-indole	COC1=C(NC=C2)C2=CC=C1	II-S	O=P1(O)OC(C([Si](C2=CC=CC=C2)(C3=CC=CC=C3)C4=CC=CC=C4)=C5)=[C@]([C@]6=C(C=CC=C7)C7=CC([Si](C8=CC=CC=C8)(C9=CC=CC=C9)C%10=CC=CC=C%10)=C6O1)C%11=C5C=CC=C%11	3.25742	0.268405	1.38001	0.0908892	0.307016	0.032608	0.255324	0.615385	21.6616
60	Angew.Chem. Int. Ed. 2012, 51,1046.	-85	CH2CL2	S04aa	Nuf07	Fbb05	P04aaNuf07	-1	10	25	24	ClCCl	O=C([C@]1(C2=CNC3=C2C=CC=C3)CC(C4=CC=CC=C4)=O)NC5=C1C=CC=C5	O=C(C1(C2=CNC3=C2C=CC=C3)O)N([H])C4=C1C=CC=C4	Enamide 5a	C=C(NC(OC)=O)C1=CC=CC=C1	XXII-S	O=P1(OC(C(C2=CC3=C(C4=C2C=CC=C4)C=CC=C3)=CC5=C6CCCC5)=[C@@]6[C@]7=C8CCCCC8=CC(C9=CC%10=C(C%11=C9C=CC=C%11)C=CC=C%10)=C7O1)O	2.7401	0.29396	1.29951	0.0874688	0.461744	0.027268	0.0461174	0	21.629
61	Angew.Chem. Int. Ed. 2012, 51,1046.	-85	CH2CL2	S04aa	Nuf07	Fba04	P04aaNuf07	-1	10	25	24	ClCCl	O=C([C@]1(C2=CNC3=C2C=CC=C3)CC(C4=CC=CC=C4)=O)NC5=C1C=CC=C5	O=C(C1(C2=CNC3=C2C=CC=C3)O)N([H])C4=C1C=CC=C4	Enamide 5a	C=C(NC(OC)=O)C1=CC=CC=C1	III-S	O=P1(OC(C(C2=CC3=C(C4=C2C=CC=C4)C=CC=C3)=CC5=C6C=CC=C5)=[C@]6[C@@]7=C8C=CC=CC8=CC(C9=C%10C=CC=CC%10=C%11C=CC=CC%11=C9)=C7O1)O	3.41261	0.29396	1.61486	0.0874688	0.461744	0.027268	0.0461174	0	21.629
62	Org. Lett. 2013, 15, 2688.	-85	Dioxane	S06ba	Nuc02	Fba11	P06baNuc01	-1	5	25	24	C1COCCO1	O=C1C2=C(C=CC=C2)C(N1CC3)([H])C4=C3C5=C(N4)C=CC=C5C	O=C1C2=C(C=CC=C2)C(N1CC3)(O)C4=C3C5=C(N4)C=CC=C5C	di-tert-butyl 2,6-dimethyl-1,4-dihydropyridine-3,5-dicarboxylate	O=C(C1=C(C)NC(C)=C(C(OC(C)(C)C)=O)C1)OC(C)(C)C	II-S	O=P1(O)OC2=[C@]([C@]3=C(C=CC=C4)C4=CC([Si](C5=CC=CC=C5)(C6=CC=CC=C6)C7=CC=CC=C7)=C3O1)C8=CC=CC=C8C=C2[Si](C9=CC=CC=C9)(C%10=CC=CC=C%10)C%11=CC=CC=C%11	3.25742	0.268405	1.38001	0.0908892	0.388593	0.0293662	0.131956	0	21.6893
63	Angew.Chem. Int. Ed. 2012, 51,1046.	-85	Toluene	S04aa	Nuf07	Fba05	P04aaNuf07	-1	10	25	24	CC1=CC=CC=C1	O=C([C@]1(C2=CNC3=C2C=CC=C3)CC(C4=CC=CC=C4)=O)NC5=C1C=CC=C5	O=C(C1(C2=CNC3=C2C=CC=C3)O)N([H])C4=C1C=CC=C4	Enamide 5a	C=C(NC(OC)=O)C1=CC=CC=C1	VIII-S	O=P1(O)OC2=[C@]([C@]3=C(C=CC=C4)C4=CC(C5=CC=C(C=CC=C6)C6=C5)=C3O1)C7=CC=CC=C7C=C2C8=CC(C=CC=C9)=C9C=C8	3.31315	0.344834	1.5884	0.102944	0.461744	0.027268	0.0461174	3.27778	21.629
64	Org. Lett. 2013, 15, 2688.	-84	Dioxane	S06ga	Nuc07	Fba11	P06gaNuc01	-1	5	25	24	C1COCCO1	O=C1C2=C(C=CC=C2)C(N1CC3)([H])C4=C3C5=C(N4)C=CC(Cl)=C5	O=C1C2=C(C=CC=C2)C(N1CC3)(O)C4=C3C5=C(N4)C=CC(Cl)=C5	di-tert-butyl 2,6-dimethyl-1,4-dihydropyridine-3,5-dicarboxylate	O=C(C1=C(C)NC(C)=C(C(OC(C)(C)C)=O)C1)OC(C)(C)C	II-S	O=P1(O)OC2=[C@]([C@]3=C(C=CC=C4)C4=CC([Si](C5=CC=CC=C5)(C6=CC=CC=C6)C7=CC=CC=C7)=C3O1)C8=CC=CC=C8C=C2[Si](C9=CC=CC=C9)(C%10=CC=CC=C%10)C%11=CC=CC=C%11	3.25742	0.268405	1.38001	0.0908892	0.388593	0.0290316	0.101842	0	21.6881
65	Eur. J. Org. Chem. 2011, 892	83	CHCl3	S03aa	Nua01	Fab04	P03aaNua01	1	5	20	84	ClC(Cl)Cl	O=C1C2=C(C=CC=C2)[C@H](C3=CNC4=C3C=CC=C4)N1	OC1NC(C2=CC=CC=C21)=O	Indole	C12=CC=CC=C1C=CN2	XXI-R	O=P1(O)OC(C(C2=CC=C(C=CC=C3)C3=C2)=C4)=[C@@]([C@@]5=C(CCCC6)C6=CC(C7=CC=C(C=CC=C8)C8=C7)=C5O1)C9=C4CCCC9	2.52678	0.344834	1.21556	0.102944	0.146649	0.0342038	0.0244598	0	21.273
66	Eur. J. Org. Chem. 2011, 3060	-83	Acetonitrile	S03ea	Nua22	Fba11	P03eaNua22	-1	5	20	66	N#CC	O=C1C2=CC=CC=C2[C@](CC=C)(C3=CNC4=C3C=CC=C4OCC5=CC=CC=C5)N1	OC1(CC=C)NC(C2=CC=CC=C21)=O	7-(benzyloxy)-1H-indole	C1(OCC2=CC=CC=C2)=C(NC=C3)C3=CC=C1	II-S	O=P1(O)OC(C([Si](C2=CC=CC=C2)(C3=CC=CC=C3)C4=CC=CC=C4)=C5)=[C@]([C@]6=C(C=CC=C7)C7=CC([Si](C8=CC=CC=C8)(C9=CC=CC=C9)C%10=CC=CC=C%10)=C6O1)C%11=C5C=CC=C%11	3.25742	0.268405	1.38001	0.0908892	0.186797	0.0257083	0.0620233	0.615385	21.5996
67	Org. Lett. 2013, 15, 2688.	-83	Dioxane	S06da	Nuc04	Fba11	P06daNuc01	-1	5	25	24	C1COCCO1	O=C1C2=C(C=CC=C2)C(N1CC3)([H])C4=C3C5=C(N4)C=C(C)C=C5	O=C1C2=C(C=CC=C2)C(N1CC3)(O)C4=C3C5=C(N4)C=C(C)C=C5	di-tert-butyl 2,6-dimethyl-1,4-dihydropyridine-3,5-dicarboxylate	O=C(C1=C(C)NC(C)=C(C(OC(C)(C)C)=O)C1)OC(C)(C)C	II-S	O=P1(O)OC2=[C@]([C@]3=C(C=CC=C4)C4=CC([Si](C5=CC=CC=C5)(C6=CC=CC=C6)C7=CC=CC=C7)=C3O1)C8=CC=CC=C8C=C2[Si](C9=CC=CC=C9)(C%10=CC=CC=C%10)C%11=CC=CC=C%11	3.25742	0.268405	1.38001	0.0908892	0.388593	0.0293662	0.131956	0	21.6898
68	Org. Lett. 2013, 15, 2688.	-83	Dioxane	S06ja	Nuc10	Fba11	P06jaNuc01	-1	5	25	24	C1COCCO1	O=C1C2=C(C=CC=C2)C(N1CC3)([H])C4=C3C5=C(N4)C=CC(F)=C5	O=C1C2=C(C=CC=C2)C(N1CC3)(O)C4=C3C5=C(N4)C=CC(F)=C5	di-tert-butyl 2,6-dimethyl-1,4-dihydropyridine-3,5-dicarboxylate	O=C(C1=C(C)NC(C)=C(C(OC(C)(C)C)=O)C1)OC(C)(C)C	II-S	O=P1(O)OC2=[C@]([C@]3=C(C=CC=C4)C4=CC([Si](C5=CC=CC=C5)(C6=CC=CC=C6)C7=CC=CC=C7)=C3O1)C8=CC=CC=C8C=C2[Si](C9=CC=CC=C9)(C%10=CC=CC=C%10)C%11=CC=CC=C%11	3.25742	0.268405	1.38001	0.0908892	0.388593	0.0303662	0.10262	0	21.5091
69	Org. Lett. 2013, 15, 2688.	-83	Dioxane	S06ea	Nuc05	Fba11	P06eaNuc01	-1	5	25	24	C1COCCO1	O=C1C2=C(C=CC=C2)C(N1CC3)([H])C4=C3C5=C(N4)C(C)=CC=C5	O=C1C2=C(C=CC=C2)C(N1CC3)(O)C4=C3C5=C(N4)C(C)=CC=C5	di-tert-butyl 2,6-dimethyl-1,4-dihydropyridine-3,5-dicarboxylate	O=C(C1=C(C)NC(C)=C(C(OC(C)(C)C)=O)C1)OC(C)(C)C	II-S	O=P1(O)OC2=[C@]([C@]3=C(C=CC=C4)C4=CC([Si](C5=CC=CC=C5)(C6=CC=CC=C6)C7=CC=CC=C7)=C3O1)C8=CC=CC=C8C=C2[Si](C9=CC=CC=C9)(C%10=CC=CC=C%10)C%11=CC=CC=C%11	3.25742	0.268405	1.38001	0.0908892	0.388593	0.0293662	0.131956	0	21.6877
70	Org. Lett. 2013, 15, 2688.	-82	Dioxane	S06ha	Nuc08	Fba11	P06haNuc01	-1	5	25	24	C1COCCO1	O=C1C2=C(C=CC=C2)C(N1CC3)([H])C4=C3C5=C(N4)C=CC(Br)=C5	O=C1C2=C(C=CC=C2)C(N1CC3)(O)C4=C3C5=C(N4)C=CC(Br)=C5	di-tert-butyl 2,6-dimethyl-1,4-dihydropyridine-3,5-dicarboxylate	O=C(C1=C(C)NC(C)=C(C(OC(C)(C)C)=O)C1)OC(C)(C)C	II-S	O=P1(O)OC2=[C@]([C@]3=C(C=CC=C4)C4=CC([Si](C5=CC=CC=C5)(C6=CC=CC=C6)C7=CC=CC=C7)=C3O1)C8=CC=CC=C8C=C2[Si](C9=CC=CC=C9)(C%10=CC=CC=C%10)C%11=CC=CC=C%11	3.25742	0.268405	1.38001	0.0908892	0.388593	0.0283622	0.102757	0	22.0201
71	Eur. J. Org. Chem. 2011, 3060	-81	Acetonitrile	S03ca	Nua03	Fba11	P03caNua03	-1	5	20	21	N#CC	O=C1C2=CC=CC=C2[C@@](C3=CNC4=C3C=C(OC)C=C4)(CC)N1	OC1(CC)NC(C2=CC=CC=C21)=O	5-methoxy-1H-indole	COC1=CC=C(NC=C2)C2=C1	II-S	O=P1(O)OC(C([Si](C2=CC=CC=C2)(C3=CC=CC=C3)C4=CC=CC=C4)=C5)=[C@]([C@]6=C(C=CC=C7)C7=CC([Si](C8=CC=CC=C8)(C9=CC=CC=C9)C%10=CC=CC=C%10)=C6O1)C%11=C5C=CC=C%11	3.25742	0.268405	1.38001	0.0908892	0.296117	0.0351953	0.158798	0.615385	21.5097
72	J. Org. Chem. 2012, 77, 2986	80	THF	S01aa	Nua01	Faa10	P01aaNua01	1	20	25	24	C1CCCO1	O=C1C2=CC=CC=C2C3(C4=CNC5=C4C=CC=C5)N1CCC6=CC(OC)=C(OC)C=C63	O=C1C2=CC=CC=C2C3(O)N1CCC4=CC(OC)=C(OC)C=C43	Indole	C1(C=CN2)=C2C=CC=C1	IV-R	O=P1(O)OC([C@@]([C@@]2=C(C(C)C)C=C(C(C)C)C=C2C(C)C)=C3)=[C@@]([C@@]4=C(C=CC=C5)C5=CC(C6=C(C(C)C)C=C(C(C)C)C=C6C(C)C)=C4O1)C7=C3C=CC=C7	2.01504	0.283503	0.957275	0.0843007	0.146649	0.0314631	0.106625	0	21.0388
73	Eur. J. Org. Chem. 2011, 3060	-80	Acetonitrile	S03ca	Nua24	Fba11	P03caNua24	-1	5	20	20	N#CC	O=C1C2=CC=CC=C2[C@@](C3=CNC4=C3C=C(OCC5=CC=CC=C5)C=C4)(CC)N1	OC1(CC)NC(C2=CC=CC=C21)=O	5-(benzyloxy)-1H-indole	C1(OCC2=CC=CC=C2)=CC=C(NC=C3)C3=C1	II-S	O=P1(O)OC(C([Si](C2=CC=CC=C2)(C3=CC=CC=C3)C4=CC=CC=C4)=C5)=[C@]([C@]6=C(C=CC=C7)C7=CC([Si](C8=CC=CC=C8)(C9=CC=CC=C9)C%10=CC=CC=C%10)=C6O1)C%11=C5C=CC=C%11	3.25742	0.268405	1.38001	0.0908892	0.179637	0.0262693	0.123172	0.615385	21.5097
74	Org. Lett. 2013, 15, 2688.	-80	Dioxane	S06aa	Nuc01	Fba11	P06aaNuc01	-1	5	25	24	C1COCCO1	O=C1C2=C(C=CC=C2)C(N1CC3)([H])C4=C3C5=C(N4)C=CC=C5	O=C1C2=C(C=CC=C2)C(N1CC3)(O)C4=C3C5=C(N4)C=CC=C5	di-tert-butyl 2,6-dimethyl-1,4-dihydropyridine-3,5-dicarboxylate	O=C(C1=C(C)NC(C)=C(C(OC(C)(C)C)=O)C1)OC(C)(C)C	II-S	O=P1(O)OC2=[C@]([C@]3=C(C=CC=C4)C4=CC([Si](C5=CC=CC=C5)(C6=CC=CC=C6)C7=CC=CC=C7)=C3O1)C8=CC=CC=C8C=C2[Si](C9=CC=CC=C9)(C%10=CC=CC=C%10)C%11=CC=CC=C%11	3.25742	0.268405	1.38001	0.0908892	0.388593	0.0308566	0.116958	0	21.6508
75	Org.Lett.2009, 11,4620.	79	CH2CL2	S05aa	Nuf02	Faa06	P05aaNuf01	1	5	0	5	ClCCl	O=C(CC(C1=CC=CC=C1)C2=CNC3=C2C=CC=C3)C4=CC=CC=C4	OC(C1=CC=CC=C1)C2=CNC3=C2C=CC=C3	Enamide 1b	C=C(NC(C1=CC=CC=C1)=O)C2=CC=CC=C2	VIa-R	O=P1(O)OC(C(C2=CC=CC=C2)=C3)=[C@@]([C@@]4=C(C=CC=C5)C5=CC(C6=CC=CC=C6)=C4O1)C7=C3C=CC=C7	3.17316	0.417002	1.55014	0.125071	0.198681	0.0138347	0.0522023	0	21.9791
76	J. Org. Chem. 2012, 77, 2986	79	THF	S01aa	Nua01	Faa10	P01aaNua01	1	5	25	24	C1CCCO1	O=C1C2=CC=CC=C2C3(C4=CNC5=C4C=CC=C5)N1CCC6=CC(OC)=C(OC)C=C63	O=C1C2=CC=CC=C2C3(O)N1CCC4=CC(OC)=C(OC)C=C43	Indole	C1(C=CN2)=C2C=CC=C1	IV-R	O=P1(O)OC([C@@]([C@@]2=C(C(C)C)C=C(C(C)C)C=C2C(C)C)=C3)=[C@@]([C@@]4=C(C=CC=C5)C5=CC(C6=C(C(C)C)C=C(C(C)C)C=C6C(C)C)=C4O1)C7=C3C=CC=C7	2.01504	0.283503	0.957275	0.0843007	0.146649	0.0314631	0.106625	0	21.0388
77	Eur. J. Org. Chem. 2011, 3060	-79	Acetonitrile	S03ea	Nua09	Fba11	P03caNua09	-1	5	20	88	N#CC	O=C1C2=CC=CC=C2[C@](CC=C)(C3=CNC4=C3C=CC(F)=C4)N1	OC1(CC=C)NC(C2=CC=CC=C21)=O	6-fluoro-1H-indole	FC1=CC=C2C(NC=C2)=C1	II-S	O=P1(O)OC(C([Si](C2=CC=CC=C2)(C3=CC=CC=C3)C4=CC=CC=C4)=C5)=[C@]([C@]6=C(C=CC=C7)C7=CC([Si](C8=CC=CC=C8)(C9=CC=CC=C9)C%10=CC=CC=C%10)=C6O1)C%11=C5C=CC=C%11	3.25742	0.268405	1.38001	0.0908892	0.321285	0.0285367	0.057219	0.615385	21.5996
78	Eur. J. Org. Chem. 2011, 3060	-79	Acetonitrile	S03ca	Nua06	Fba11	P03caNua06	-1	5	20	20	N#CC	O=C1C2=CC=CC=C2[C@@](C3=CNC4=C3C=CC(Cl)=C4)(CC)N1	OC1(CC)NC(C2=CC=CC=C21)=O	6-chloro-1H-indole	ClC1=CC=C2C(NC=C2)=C1	II-S	O=P1(O)OC(C([Si](C2=CC=CC=C2)(C3=CC=CC=C3)C4=CC=CC=C4)=C5)=[C@]([C@]6=C(C=CC=C7)C7=CC([Si](C8=CC=CC=C8)(C9=CC=CC=C9)C%10=CC=CC=C%10)=C6O1)C%11=C5C=CC=C%11	3.25742	0.268405	1.38001	0.0908892	0.275374	0.0286451	0.132349	0.615385	21.5097
79	Eur. J. Org. Chem. 2011, 3060	-79	Acetonitrile	S03ca	Nua09	Fba11	P03caNua09	-1	5	20	30	N#CC	O=C1C2=CC=CC=C2[C@@](C3=CNC4=C3C=CC(F)=C4)(CC)N1	OC1(CC)NC(C2=CC=CC=C21)=O	6-fluoro-1H-indole	FC1=CC=C2C(NC=C2)=C1	II-S	O=P1(O)OC(C([Si](C2=CC=CC=C2)(C3=CC=CC=C3)C4=CC=CC=C4)=C5)=[C@]([C@]6=C(C=CC=C7)C7=CC([Si](C8=CC=CC=C8)(C9=CC=CC=C9)C%10=CC=CC=C%10)=C6O1)C%11=C5C=CC=C%11	3.25742	0.268405	1.38001	0.0908892	0.321285	0.0299619	0.13336	0.615385	21.5097
80	Eur. J. Org. Chem. 2011, 3060	-79	Acetonitrile	S03ea	Nua01	Fba11	P03eaNua01	-1	5	20	48	N#CC	O=C1C2=CC=CC=C2[C@](CC=C)(C3=CNC4=C3C=CC=C4)N1	OC1(CC=C)NC(C2=CC=CC=C21)=O	Indole	C12=CC=CC=C1C=CN2	II-S	O=P1(O)OC(C([Si](C2=CC=CC=C2)(C3=CC=CC=C3)C4=CC=CC=C4)=C5)=[C@]([C@]6=C(C=CC=C7)C7=CC([Si](C8=CC=CC=C8)(C9=CC=CC=C9)C%10=CC=CC=C%10)=C6O1)C%11=C5C=CC=C%11	3.25742	0.268405	1.38001	0.0908892	0.146649	0.0289752	0.0648194	0.615385	21.5996
81	Org. Lett. 2013, 15, 2688.	-79	Dioxane	S06aa	Nuc01	Fba11	P06aaNuc01	-1	5	25	72	C1COCCO1	O=C1C2=C(C=CC=C2)C(N1CC3)([H])C4=C3C5=C(N4)C=CC=C5	O=C1C2=C(C=CC=C2)C(N1CC3)(O)C4=C3C5=C(N4)C=CC=C5	di-tert-butyl 2,6-dimethyl-1,4-dihydropyridine-3,5-dicarboxylate	O=C(C1=C(C)NC(C)=C(C(OC(C)(C)C)=O)C1)OC(C)(C)C	II-S	O=P1(O)OC2=[C@]([C@]3=C(C=CC=C4)C4=CC([Si](C5=CC=CC=C5)(C6=CC=CC=C6)C7=CC=CC=C7)=C3O1)C8=CC=CC=C8C=C2[Si](C9=CC=CC=C9)(C%10=CC=CC=C%10)C%11=CC=CC=C%11	3.25742	0.268405	1.38001	0.0908892	0.388593	0.0308566	0.116958	0	21.6508
82	Org. Lett. 2013, 15, 2688.	-79	Dioxane	S06ca	Nuc03	Fba11	P06caNuc01	-1	5	25	24	C1COCCO1	O=C1C2=C(C=CC=C2)C(N1CC3)([H])C4=C3C5=C(N4)C=CC(C)=C5	O=C1C2=C(C=CC=C2)C(N1CC3)(O)C4=C3C5=C(N4)C=CC(C)=C5	di-tert-butyl 2,6-dimethyl-1,4-dihydropyridine-3,5-dicarboxylate	O=C(C1=C(C)NC(C)=C(C(OC(C)(C)C)=O)C1)OC(C)(C)C	II-S	O=P1(O)OC2=[C@]([C@]3=C(C=CC=C4)C4=CC([Si](C5=CC=CC=C5)(C6=CC=CC=C6)C7=CC=CC=C7)=C3O1)C8=CC=CC=C8C=C2[Si](C9=CC=CC=C9)(C%10=CC=CC=C%10)C%11=CC=CC=C%11	3.25742	0.268405	1.38001	0.0908892	0.388593	0.0293662	0.131956	0	21.6881
83	J. Org. Chem. 2012, 77, 2986	78	THF	S01aa	Nua01	Faa10	P01aaNua01	1	20	-10	24	C1CCCO1	O=C1C2=CC=CC=C2C3(C4=CNC5=C4C=CC=C5)N1CCC6=CC(OC)=C(OC)C=C63	O=C1C2=CC=CC=C2C3(O)N1CCC4=CC(OC)=C(OC)C=C43	Indole	C1(C=CN2)=C2C=CC=C1	IV-R	O=P1(O)OC([C@@]([C@@]2=C(C(C)C)C=C(C(C)C)C=C2C(C)C)=C3)=[C@@]([C@@]4=C(C=CC=C5)C5=CC(C6=C(C(C)C)C=C(C(C)C)C=C6C(C)C)=C4O1)C7=C3C=CC=C7	2.01504	0.283503	0.957275	0.0843007	0.146649	0.0314631	0.106625	0	21.0388
84	J. Org. Chem. 2012, 77, 2986	78	THF	S01aa	Nua01	Faa10	P01aaNua01	1	20	25	24	C1CCCO1	O=C1C2=CC=CC=C2C3(C4=CNC5=C4C=CC=C5)N1CCC6=CC(OC)=C(OC)C=C63	O=C1C2=CC=CC=C2C3(O)N1CCC4=CC(OC)=C(OC)C=C43	Indole	C1(C=CN2)=C2C=CC=C1	IV-R	O=P1(O)OC([C@@]([C@@]2=C(C(C)C)C=C(C(C)C)C=C2C(C)C)=C3)=[C@@]([C@@]4=C(C=CC=C5)C5=CC(C6=C(C(C)C)C=C(C(C)C)C=C6C(C)C)=C4O1)C7=C3C=CC=C7	2.01504	0.283503	0.957275	0.0843007	0.146649	0.0314631	0.106625	0	21.0388
85	J. Org. Chem. 2012, 77, 2986	78	THF	S01aa	Nua01	Faa10	P01aaNua01	1	2.5	25	24	C1CCCO1	O=C1C2=CC=CC=C2C3(C4=CNC5=C4C=CC=C5)N1CCC6=CC(OC)=C(OC)C=C63	O=C1C2=CC=CC=C2C3(O)N1CCC4=CC(OC)=C(OC)C=C43	Indole	C1(C=CN2)=C2C=CC=C1	IV-R	O=P1(O)OC([C@@]([C@@]2=C(C(C)C)C=C(C(C)C)C=C2C(C)C)=C3)=[C@@]([C@@]4=C(C=CC=C5)C5=CC(C6=C(C(C)C)C=C(C(C)C)C=C6C(C)C)=C4O1)C7=C3C=CC=C7	2.01504	0.283503	0.957275	0.0843007	0.146649	0.0314631	0.106625	0	21.0388
86	Eur. J. Org. Chem. 2011, 3060	-78	Acetonitrile	S03ca	Nua01	Fba11	P03caNua01	-1	5	20	11	N#CC	O=C1C2=CC=CC=C2[C@@](C3=CNC4=C3C=CC=C4)(CC)N1	OC1(CC)NC(C2=CC=CC=C21)=O	Indole	C12=CC=CC=C1C=CN2	II-S	O=P1(O)OC(C([Si](C2=CC=CC=C2)(C3=CC=CC=C3)C4=CC=CC=C4)=C5)=[C@]([C@]6=C(C=CC=C7)C7=CC([Si](C8=CC=CC=C8)(C9=CC=CC=C9)C%10=CC=CC=C%10)=C6O1)C%11=C5C=CC=C%11	3.25742	0.268405	1.38001	0.0908892	0.146649	0.0304457	0.151994	0.615385	21.5097
87	Eur. J. Org. Chem. 2011, 3060	-77	Acetonitrile	S03da	Nua01	Fba11	P03daNua01	-1	5	20	12	N#CC	O=C1C2=CC=CC=C2[C@](CCCC)(C3=CNC4=C3C=CC=C4)N1	OC1(CCCC)NC(C2=CC=CC=C21)=O	Indole	C12=CC=CC=C1C=CN2	II-S	O=P1(O)OC(C([Si](C2=CC=CC=C2)(C3=CC=CC=C3)C4=CC=CC=C4)=C5)=[C@]([C@]6=C(C=CC=C7)C7=CC([Si](C8=CC=CC=C8)(C9=CC=CC=C9)C%10=CC=CC=C%10)=C6O1)C%11=C5C=CC=C%11	3.25742	0.268405	1.38001	0.0908892	0.146649	0.0276402	0.258946	0.615385	21.6616
88	Angew.Chem. Int. Ed. 2012, 51,1046.	-77	CH2CL2	S04aa	Nuf07	Faa07	P04aaNuf07	-1	10	25	24	ClCCl	O=C([C@]1(C2=CNC3=C2C=CC=C3)CC(C4=CC=CC=C4)=O)NC5=C1C=CC=C5	O=C(C1(C2=CNC3=C2C=CC=C3)O)N([H])C4=C1C=CC=C4	Enamide 5a	C=C(NC(OC)=O)C1=CC=CC=C1	XVIII-S	O=P1(O)OC(C(C2=CC=CC=C2)=C3)=[C@]([C@]4=C(C=CC=C5)C5=CC(C6=CC=CC=C6)=C4O1)C7=C3C=CC=C7	3.17316	0.417002	1.55014	0.125071	0.461744	0.027268	0.0461174	0	21.629
89	Org. Lett. 2013, 15, 2688.	-77	Dioxane	S06fa	Nuc06	Fba11	P06faNuc01	-1	5	25	24	C1COCCO1	O=C1C2=C(C=CC=C2)C(N1CC3)([H])C4=C3C5=C(N4)C=CC(OC)=C5	O=C1C2=C(C=CC=C2)C(N1CC3)(O)C4=C3C5=C(N4)C=CC(OC)=C5	di-tert-butyl 2,6-dimethyl-1,4-dihydropyridine-3,5-dicarboxylate	O=C(C1=C(C)NC(C)=C(C(OC(C)(C)C)=O)C1)OC(C)(C)C	II-S	O=P1(O)OC2=[C@]([C@]3=C(C=CC=C4)C4=CC([Si](C5=CC=CC=C5)(C6=CC=CC=C6)C7=CC=CC=C7)=C3O1)C8=CC=CC=C8C=C2[Si](C9=CC=CC=C9)(C%10=CC=CC=C%10)C%11=CC=CC=C%11	3.25742	0.268405	1.38001	0.0908892	0.388593	0.0355779	0.127289	0	21.3163
90	Org. Lett. 2013, 15, 2688.	-77	Dioxane	S06aa	Nuc01	Fba11	P06aaNuc01	-1	5	25	24	C1COCCO1	O=C1C2=C(C=CC=C2)C(N1CC3)([H])C4=C3C5=C(N4)C=CC=C5	O=C1C2=C(C=CC=C2)C(N1CC3)(O)C4=C3C5=C(N4)C=CC=C5	di-tert-butyl 2,6-dimethyl-1,4-dihydropyridine-3,5-dicarboxylate	O=C(C1=C(C)NC(C)=C(C(OC(C)(C)C)=O)C1)OC(C)(C)C	II-S	O=P1(O)OC2=[C@]([C@]3=C(C=CC=C4)C4=CC([Si](C5=CC=CC=C5)(C6=CC=CC=C6)C7=CC=CC=C7)=C3O1)C8=CC=CC=C8C=C2[Si](C9=CC=CC=C9)(C%10=CC=CC=C%10)C%11=CC=CC=C%11	3.25742	0.268405	1.38001	0.0908892	0.388593	0.0308566	0.116958	0	21.6508
91	Eur. J. Org. Chem. 2011, 3060	-76	Acetonitrile	S03ea	Nua23	Fba11	P03eaNua23	-1	5	20	42	N#CC	O=C1C2=CC=CC=C2[C@](CC=C)(C3=CNC4=C3C=CC(OCC5=CC=CC=C5)=C4)N1	OC1(CC=C)NC(C2=CC=CC=C21)=O	6-(benzyloxy)-1H-indole	C1(OCC2=CC=CC=C2)=CC=C3C(NC=C3)=C1	II-S	O=P1(O)OC(C([Si](C2=CC=CC=C2)(C3=CC=CC=C3)C4=CC=CC=C4)=C5)=[C@]([C@]6=C(C=CC=C7)C7=CC([Si](C8=CC=CC=C8)(C9=CC=CC=C9)C%10=CC=CC=C%10)=C6O1)C%11=C5C=CC=C%11	3.25742	0.268405	1.38001	0.0908892	0.179637	0.0253364	0.0620233	0.615385	21.5996
92	Eur. J. Org. Chem. 2011, 3060	-76	Acetonitrile	S03ea	Nua01	Fba11	P03eaNua01	-1	5	20	72	N#CC	O=C1C2=CC=CC=C2[C@](CC=C)(C3=CNC4=C3C=CC=C4)N1	OC1(CC=C)NC(C2=CC=CC=C21)=O	Indole	C12=CC=CC=C1C=CN2	II-S	O=P1(O)OC(C([Si](C2=CC=CC=C2)(C3=CC=CC=C3)C4=CC=CC=C4)=C5)=[C@]([C@]6=C(C=CC=C7)C7=CC([Si](C8=CC=CC=C8)(C9=CC=CC=C9)C%10=CC=CC=C%10)=C6O1)C%11=C5C=CC=C%11	3.25742	0.268405	1.38001	0.0908892	0.146649	0.0289752	0.0648194	0.615385	21.5996
93	Eur. J. Org. Chem. 2011, 3060	-76	Acetonitrile	S03ca	Nua01	Fba11	P03caNua01	-1	5	20	12	N#CC	O=C1C2=CC=CC=C2[C@@](C3=CNC4=C3C=CC=C4)(CC)N1	OC1(CC)NC(C2=CC=CC=C21)=O	Indole	C12=CC=CC=C1C=CN2	II-S	O=P1(O)OC(C([Si](C2=CC=CC=C2)(C3=CC=CC=C3)C4=CC=CC=C4)=C5)=[C@]([C@]6=C(C=CC=C7)C7=CC([Si](C8=CC=CC=C8)(C9=CC=CC=C9)C%10=CC=CC=C%10)=C6O1)C%11=C5C=CC=C%11	3.25742	0.268405	1.38001	0.0908892	0.146649	0.0304457	0.151994	0.615385	21.5097
94	Eur. J. Org. Chem. 2011, 3060	-75	Acetonitrile	S03ca	Nua01	Fba11	P03caNua01	-1	5	20	20	N#CC	O=C1C2=CC=CC=C2[C@@](C3=CNC4=C3C=CC=C4)(CC)N1	OC1(CC)NC(C2=CC=CC=C21)=O	Indole	C12=CC=CC=C1C=CN2	II-S	O=P1(O)OC(C([Si](C2=CC=CC=C2)(C3=CC=CC=C3)C4=CC=CC=C4)=C5)=[C@]([C@]6=C(C=CC=C7)C7=CC([Si](C8=CC=CC=C8)(C9=CC=CC=C9)C%10=CC=CC=C%10)=C6O1)C%11=C5C=CC=C%11	3.25742	0.268405	1.38001	0.0908892	0.146649	0.0304457	0.151994	0.615385	21.5097
95	Org. Lett. 2013, 15, 2688.	-75	Dioxane	S06aa	Nuc01	Fba11	P06aaNuc01	-1	5	25	72	C1COCCO1	O=C1C2=C(C=CC=C2)C(N1CC3)([H])C4=C3C5=C(N4)C=CC=C5	O=C1C2=C(C=CC=C2)C(N1CC3)(O)C4=C3C5=C(N4)C=CC=C5	di-tert-butyl 2,6-dimethyl-1,4-dihydropyridine-3,5-dicarboxylate	O=C(C1=C(C)NC(C)=C(C(OC(C)(C)C)=O)C1)OC(C)(C)C	II-S	O=P1(O)OC2=[C@]([C@]3=C(C=CC=C4)C4=CC([Si](C5=CC=CC=C5)(C6=CC=CC=C6)C7=CC=CC=C7)=C3O1)C8=CC=CC=C8C=C2[Si](C9=CC=CC=C9)(C%10=CC=CC=C%10)C%11=CC=CC=C%11	3.25742	0.268405	1.38001	0.0908892	0.388593	0.0308566	0.116958	0	21.6508
96	Org. Lett. 2013, 15, 2688.	-75	Dioxane	S06aa	Nuc02	Fba11	P06aaNuc01	-1	5	25	24	C1COCCO1	O=C1C2=C(C=CC=C2)C(N1CC3)([H])C4=C3C5=C(N4)C=CC=C5	O=C1C2=C(C=CC=C2)C(N1CC3)(O)C4=C3C5=C(N4)C=CC=C5	Diethyl 1,4-dihydro-2,6-dimethyl-3,5-pyridinedicarboxylate	O=C(C1=C(C)NC(C)=C(C(OCC)=O)C1)OCC	II-S	O=P1(O)OC2=[C@]([C@]3=C(C=CC=C4)C4=CC([Si](C5=CC=CC=C5)(C6=CC=CC=C6)C7=CC=CC=C7)=C3O1)C8=CC=CC=C8C=C2[Si](C9=CC=CC=C9)(C%10=CC=CC=C%10)C%11=CC=CC=C%11	3.25742	0.268405	1.38001	0.0908892	0.484828	0.0308566	0.116958	0	21.6508
97	J. Org. Chem. 2012, 77, 2986	74	THF	S01aa	Nua03	Faa10	P01aaNua03	1	20	25	24	C1CCCO1	O=C1C2=CC=CC=C2C3(C4=CNC5=C4C=C(OC)C=C5)N1CCC6=CC(OC)=C(OC)C=C63	O=C1C2=CC=CC=C2C3(O)N1CCC4=CC(OC)=C(OC)C=C43	5-methoxiindole	COC1=CC(C=CN2)=C2C=C1	IV-R	O=P1(O)OC([C@@]([C@@]2=C(C(C)C)C=C(C(C)C)C=C2C(C)C)=C3)=[C@@]([C@@]4=C(C=CC=C5)C5=CC(C6=C(C(C)C)C=C(C(C)C)C=C6C(C)C)=C4O1)C7=C3C=CC=C7	2.01504	0.283503	0.957275	0.0843007	0.296117	0.0347561	0.114301	0	21.0388
98	J. Org. Chem. 2012, 77, 2986	74	THF	S01aa	Nua01	Faa10	P01aaNua01	1	10	25	24	C1CCCO1	O=C1C2=CC=CC=C2C3(C4=CNC5=C4C=CC=C5)N1CCC6=CC(OC)=C(OC)C=C63	O=C1C2=CC=CC=C2C3(O)N1CCC4=CC(OC)=C(OC)C=C43	Indole	C1(C=CN2)=C2C=CC=C1	IV-R	O=P1(O)OC([C@@]([C@@]2=C(C(C)C)C=C(C(C)C)C=C2C(C)C)=C3)=[C@@]([C@@]4=C(C=CC=C5)C5=CC(C6=C(C(C)C)C=C(C(C)C)C=C6C(C)C)=C4O1)C7=C3C=CC=C7	2.01504	0.283503	0.957275	0.0843007	0.146649	0.0314631	0.106625	0	21.0388
99	Eur. J. Org. Chem. 2011, 3060	-74	THF	S03ca	Nua01	Fba11	P03caNua01	-1	5	20	120	C1CCCO1	O=C1C2=CC=CC=C2[C@@](C3=CNC4=C3C=CC=C4)(CC)N1	OC1(CC)NC(C2=CC=CC=C21)=O	Indole	C12=CC=CC=C1C=CN2	II-S	O=P1(O)OC(C([Si](C2=CC=CC=C2)(C3=CC=CC=C3)C4=CC=CC=C4)=C5)=[C@]([C@]6=C(C=CC=C7)C7=CC([Si](C8=CC=CC=C8)(C9=CC=CC=C9)C%10=CC=CC=C%10)=C6O1)C%11=C5C=CC=C%11	3.25742	0.268405	1.38001	0.0908892	0.146649	0.0304457	0.151994	0	21.5097
100	Angew.Chem. Int. Ed. 2012, 51,1046.	-73	CHCl3	S04aa	Nuf07	Fba05	P04aaNuf07	-1	10	25	24	ClC(Cl)Cl	O=C([C@]1(C2=CNC3=C2C=CC=C3)CC(C4=CC=CC=C4)=O)NC5=C1C=CC=C5	O=C(C1(C2=CNC3=C2C=CC=C3)O)N([H])C4=C1C=CC=C4	Enamide 5a	C=C(NC(OC)=O)C1=CC=CC=C1	VIII-S	O=P1(O)OC2=[C@]([C@]3=C(C=CC=C4)C4=CC(C5=CC=C(C=CC=C6)C6=C5)=C3O1)C7=CC=CC=C7C=C2C8=CC(C=CC=C9)=C9C=C8	3.31315	0.344834	1.5884	0.102944	0.461744	0.027268	0.0461174	0	21.629
101	Org. Lett. 2013, 15, 2688.	-73	Dioxane	S06aa	Nuc01	Fba11	P06aaNuc01	-1	5	25	72	C1COCCO1	O=C1C2=C(C=CC=C2)C(N1CC3)([H])C4=C3C5=C(N4)C=CC=C5	O=C1C2=C(C=CC=C2)C(N1CC3)(O)C4=C3C5=C(N4)C=CC=C5	di-tert-butyl 2,6-dimethyl-1,4-dihydropyridine-3,5-dicarboxylate	O=C(C1=C(C)NC(C)=C(C(OC(C)(C)C)=O)C1)OC(C)(C)C	II-S	O=P1(O)OC2=[C@]([C@]3=C(C=CC=C4)C4=CC([Si](C5=CC=CC=C5)(C6=CC=CC=C6)C7=CC=CC=C7)=C3O1)C8=CC=CC=C8C=C2[Si](C9=CC=CC=C9)(C%10=CC=CC=C%10)C%11=CC=CC=C%11	3.25742	0.268405	1.38001	0.0908892	0.388593	0.0308566	0.116958	0	21.6508
102	Eur. J. Org. Chem. 2011, 892	72	CHCl3	S03aa	Nua09	Fab04	P03aaNua09	1	5	20	48	ClC(Cl)Cl	O=C1C2=C(C=CC=C2)[C@H](C3=CNC4=C3C=CC(F)=C4)N1	OC1NC(C2=CC=CC=C21)=O	6-fluoro-1H-indole	FC1=CC=C2C(NC=C2)=C1	XXI-R	O=P1(O)OC(C(C2=CC=C(C=CC=C3)C3=C2)=C4)=[C@@]([C@@]5=C(CCCC6)C6=CC(C7=CC=C(C=CC=C8)C8=C7)=C5O1)C9=C4CCCC9	2.52678	0.344834	1.21556	0.102944	0.321285	0.0336	0.0211608	0	21.273
103	J. Org. Chem. 2012, 77, 2986	72	THF	S01aa	Nua03	Faa10	P01aaNua03	1	5	25	24	C1CCCO1	O=C1C2=CC=CC=C2C3(C4=CNC5=C4C=C(OC)C=C5)N1CCC6=CC(OC)=C(OC)C=C63	O=C1C2=CC=CC=C2C3(O)N1CCC4=CC(OC)=C(OC)C=C43	5-methoxiindole	COC1=CC(C=CN2)=C2C=C1	IV-R	O=P1(O)OC([C@@]([C@@]2=C(C(C)C)C=C(C(C)C)C=C2C(C)C)=C3)=[C@@]([C@@]4=C(C=CC=C5)C5=CC(C6=C(C(C)C)C=C(C(C)C)C=C6C(C)C)=C4O1)C7=C3C=CC=C7	2.01504	0.283503	0.957275	0.0843007	0.296117	0.0347561	0.114301	0	21.0388
104	Eur. J. Org. Chem. 2011, 892	71	CH2CL2	S03aa	Nua01	Fab04	P03aaNua01	1	5	20	84	ClCCl	O=C1C2=C(C=CC=C2)[C@H](C3=CNC4=C3C=CC=C4)N1	OC1NC(C2=CC=CC=C21)=O	Indole	C12=CC=CC=C1C=CN2	XXI-R	O=P1(O)OC(C(C2=CC=C(C=CC=C3)C3=C2)=C4)=[C@@]([C@@]5=C(CCCC6)C6=CC(C7=CC=C(C=CC=C8)C8=C7)=C5O1)C9=C4CCCC9	2.52678	0.344834	1.21556	0.102944	0.146649	0.0342038	0.0244598	0	21.273
105	J. Org. Chem. 2012, 77, 2986	70	DMF	S01aa	Nua01	Faa10	P01aaNua01	1	2.5	25	24	[H]C(N(C)C)=O	O=C1C2=CC=CC=C2C3(C4=CNC5=C4C=CC=C5)N1CCC6=CC(OC)=C(OC)C=C63	O=C1C2=CC=CC=C2C3(O)N1CCC4=CC(OC)=C(OC)C=C43	Indole	C1(C=CN2)=C2C=CC=C1	IV-R	O=P1(O)OC([C@@]([C@@]2=C(C(C)C)C=C(C(C)C)C=C2C(C)C)=C3)=[C@@]([C@@]4=C(C=CC=C5)C5=CC(C6=C(C(C)C)C=C(C(C)C)C=C6C(C)C)=C4O1)C7=C3C=CC=C7	2.01504	0.283503	0.957275	0.0843007	0.146649	0.0314631	0.106625	0.295125	21.0388
106	J. Org. Chem. 2012, 77, 2986	70	THF	S01aa	Nua03	Faa10	P01aaNua03	1	2.5	25	24	C1CCCO1	O=C1C2=CC=CC=C2C3(C4=CNC5=C4C=C(OC)C=C5)N1CCC6=CC(OC)=C(OC)C=C63	O=C1C2=CC=CC=C2C3(O)N1CCC4=CC(OC)=C(OC)C=C43	5-methoxiindole	COC1=CC(C=CN2)=C2C=C1	IV-R	O=P1(O)OC([C@@]([C@@]2=C(C(C)C)C=C(C(C)C)C=C2C(C)C)=C3)=[C@@]([C@@]4=C(C=CC=C5)C5=CC(C6=C(C(C)C)C=C(C(C)C)C=C6C(C)C)=C4O1)C7=C3C=CC=C7	2.01504	0.283503	0.957275	0.0843007	0.296117	0.0347561	0.114301	0	21.0388
107	J. Org. Chem. 2012, 77, 2986	70	THF	S01aa	Nua01	Faa10	P01aaNua01	1	20	25	22	C1CCCO1	O=C1C2=CC=CC=C2C3(C4=CNC5=C4C=CC=C5)N1CCC6=CC(OC)=C(OC)C=C63	O=C1C2=CC=CC=C2C3(O)N1CCC4=CC(OC)=C(OC)C=C43	Indole	C1(C=CN2)=C2C=CC=C1	IV-R	O=P1(O)OC([C@@]([C@@]2=C(C(C)C)C=C(C(C)C)C=C2C(C)C)=C3)=[C@@]([C@@]4=C(C=CC=C5)C5=CC(C6=C(C(C)C)C=C(C(C)C)C=C6C(C)C)=C4O1)C7=C3C=CC=C7	2.01504	0.283503	0.957275	0.0843007	0.146649	0.0314631	0.106625	0	21.0388
108	Eur. J. Org. Chem. 2011, 3060	-70	Acetonitrile	S03ca	Nua01	Fba11	P03caNua01	-1	5	20	26	N#CC	O=C1C2=CC=CC=C2[C@@](C3=CNC4=C3C=CC=C4)(CC)N1	OC1(CC)NC(C2=CC=CC=C21)=O	Indole	C12=CC=CC=C1C=CN2	II-S	O=P1(O)OC(C([Si](C2=CC=CC=C2)(C3=CC=CC=C3)C4=CC=CC=C4)=C5)=[C@]([C@]6=C(C=CC=C7)C7=CC([Si](C8=CC=CC=C8)(C9=CC=CC=C9)C%10=CC=CC=C%10)=C6O1)C%11=C5C=CC=C%11	3.25742	0.268405	1.38001	0.0908892	0.146649	0.0304457	0.151994	0.615385	21.5097
109	Eur. J. Org. Chem. 2011, 3060	-70	Ethylacetate	S03ca	Nua01	Fba11	P03caNua01	-1	5	20	66	CC(OCC)=O	O=C1C2=CC=CC=C2[C@@](C3=CNC4=C3C=CC=C4)(CC)N1	OC1(CC)NC(C2=CC=CC=C21)=O	Indole	C12=CC=CC=C1C=CN2	II-S	O=P1(O)OC(C([Si](C2=CC=CC=C2)(C3=CC=CC=C3)C4=CC=CC=C4)=C5)=[C@]([C@]6=C(C=CC=C7)C7=CC([Si](C8=CC=CC=C8)(C9=CC=CC=C9)C%10=CC=CC=C%10)=C6O1)C%11=C5C=CC=C%11	3.25742	0.268405	1.38001	0.0908892	0.146649	0.0304457	0.151994	0.258929	21.5097
110	Eur. J. Org. Chem. 2011, 892	68	CHCl3	S03aa	Nua14	Fab04	P03aaNua14	1	5	20	48	ClC(Cl)Cl	O=C1C2=C(C=CC=C2)[C@H](C3=C(C)NC4=C3C=CC=C4)N1	OC1NC(C2=CC=CC=C21)=O	2-methyl-1H-indole	CC1=CC2=CC=CC=C2N1	XXI-R	O=P1(O)OC(C(C2=CC=C(C=CC=C3)C3=C2)=C4)=[C@@]([C@@]5=C(CCCC6)C6=CC(C7=CC=C(C=CC=C8)C8=C7)=C5O1)C9=C4CCCC9	2.52678	0.344834	1.21556	0.102944	0.124478	0.031702	0.0529582	0	21.273
111	J. Org. Chem. 2012, 77, 2986	68	THF	S01aa	Nua04	Faa10	P01aaNua04	1	5	25	24	C1CCCO1	O=C1C2=CC=CC=C2C3(C4=CNC5=C4C=C(Br)C=C5)N1CCC6=CC(OC)=C(OC)C=C63	O=C1C2=CC=CC=C2C3(O)N1CCC4=CC(OC)=C(OC)C=C43	5-bromoindole	BrC(C=C1)=CC2=C1NC=C2	IV-R	O=P1(O)OC([C@@]([C@@]2=C(C(C)C)C=C(C(C)C)C=C2C(C)C)=C3)=[C@@]([C@@]4=C(C=CC=C5)C5=CC(C6=C(C(C)C)C=C(C(C)C)C=C6C(C)C)=C4O1)C7=C3C=CC=C7	2.01504	0.283503	0.957275	0.0843007	0.254958	0.0296664	0.0978188	0	21.0388
112	J. Org. Chem. 2012, 77, 2986	68	THF	S01aa	Nua01	Faa10	P01aaNua01	1	30	25	24	C1CCCO1	O=C1C2=CC=CC=C2C3(C4=CNC5=C4C=CC=C5)N1CCC6=CC(OC)=C(OC)C=C63	O=C1C2=CC=CC=C2C3(O)N1CCC4=CC(OC)=C(OC)C=C43	Indole	C1(C=CN2)=C2C=CC=C1	IV-R	O=P1(O)OC([C@@]([C@@]2=C(C(C)C)C=C(C(C)C)C=C2C(C)C)=C3)=[C@@]([C@@]4=C(C=CC=C5)C5=CC(C6=C(C(C)C)C=C(C(C)C)C=C6C(C)C)=C4O1)C7=C3C=CC=C7	2.01504	0.283503	0.957275	0.0843007	0.146649	0.0314631	0.106625	0	21.0388
113	Eur. J. Org. Chem. 2011, 3060	-68	Acetonitrile	S03ca	Nua10	Fba11	P03caNua10	-1	5	20	48	N#CC	O=C1C2=CC=CC=C2[C@@](C3=CNC4=C3C=C(F)C=C4)(CC)N1	OC1(CC)NC(C2=CC=CC=C21)=O	5-fluoro-1H-indole	FC1=CC=C(NC=C2)C2=C1	II-S	O=P1(O)OC(C([Si](C2=CC=CC=C2)(C3=CC=CC=C3)C4=CC=CC=C4)=C5)=[C@]([C@]6=C(C=CC=C7)C7=CC([Si](C8=CC=CC=C8)(C9=CC=CC=C9)C%10=CC=CC=C%10)=C6O1)C%11=C5C=CC=C%11	3.25742	0.268405	1.38001	0.0908892	0.321285	0.0299619	0.13336	0.615385	21.5097
114	Eur. J. Org. Chem. 2011, 3060	-68	Acetonitrile	S03ca	Nua07	Fba11	P03caNua07	-1	5	20	30	N#CC	O=C1C2=CC=CC=C2[C@@](C3=CNC4=C3C=C(Cl)C=C4)(CC)N1	OC1(CC)NC(C2=CC=CC=C21)=O	5-chloro-1H-indole	ClC1=CC=C(NC=C2)C2=C1	II-S	O=P1(O)OC(C([Si](C2=CC=CC=C2)(C3=CC=CC=C3)C4=CC=CC=C4)=C5)=[C@]([C@]6=C(C=CC=C7)C7=CC([Si](C8=CC=CC=C8)(C9=CC=CC=C9)C%10=CC=CC=C%10)=C6O1)C%11=C5C=CC=C%11	3.25742	0.268405	1.38001	0.0908892	0.275374	0.0286451	0.132349	0.615385	21.5097
115	Eur. J. Org. Chem. 2011, 3060	-68	Acetonitrile	S03ca	Nua01	Fba11	P03caNua01	-1	5	40	3	N#CC	O=C1C2=CC=CC=C2[C@@](C3=CNC4=C3C=CC=C4)(CC)N1	OC1(CC)NC(C2=CC=CC=C21)=O	Indole	C12=CC=CC=C1C=CN2	II-S	O=P1(O)OC(C([Si](C2=CC=CC=C2)(C3=CC=CC=C3)C4=CC=CC=C4)=C5)=[C@]([C@]6=C(C=CC=C7)C7=CC([Si](C8=CC=CC=C8)(C9=CC=CC=C9)C%10=CC=CC=C%10)=C6O1)C%11=C5C=CC=C%11	3.25742	0.268405	1.38001	0.0908892	0.146649	0.0304457	0.151994	0.615385	21.5097
116	Eur. J. Org. Chem. 2011, 892	66	CHCl3	S03aa	Nua04	Fab04	P03aaNua04	1	5	20	48	ClC(Cl)Cl	O=C1C2=C(C=CC=C2)[C@H](C3=CNC4=C3C=C(Br)C=C4)N1	OC1NC(C2=CC=CC=C21)=O	5-bromo-1H-indole	BrC1=CC=C(NC=C2)C2=C1	XXI-R	O=P1(O)OC(C(C2=CC=C(C=CC=C3)C3=C2)=C4)=[C@@]([C@@]5=C(CCCC6)C6=CC(C7=CC=C(C=CC=C8)C8=C7)=C5O1)C9=C4CCCC9	2.52678	0.344834	1.21556	0.102944	0.254958	0.0311544	0.0211919	0	21.273
117	J. Org. Chem. 2012, 77, 2986	66	Dioxane	S01aa	Nua01	Faa10	P01aaNua01	1	20	25	24	C1COCCO1	O=C1C2=CC=CC=C2C3(C4=CNC5=C4C=CC=C5)N1CCC6=CC(OC)=C(OC)C=C63	O=C1C2=CC=CC=C2C3(O)N1CCC4=CC(OC)=C(OC)C=C43	Indole	C1(C=CN2)=C2C=CC=C1	IV-R	O=P1(O)OC([C@@]([C@@]2=C(C(C)C)C=C(C(C)C)C=C2C(C)C)=C3)=[C@@]([C@@]4=C(C=CC=C5)C5=CC(C6=C(C(C)C)C=C(C(C)C)C=C6C(C)C)=C4O1)C7=C3C=CC=C7	2.01504	0.283503	0.957275	0.0843007	0.146649	0.0314631	0.106625	0	21.0388
118	Eur. J. Org. Chem. 2011, 3060	-66	Acetonitrile	S03ea	Nua06	Fba11	P03eaNua06	-1	5	20	74	N#CC	O=C1C2=CC=CC=C2[C@](CC=C)(C3=CNC4=C3C=CC(Cl)=C4)N1	OC1(CC=C)NC(C2=CC=CC=C21)=O	6-chloro-1H-indole	ClC1=CC=C2C(NC=C2)=C1	II-S	O=P1(O)OC(C([Si](C2=CC=CC=C2)(C3=CC=CC=C3)C4=CC=CC=C4)=C5)=[C@]([C@]6=C(C=CC=C7)C7=CC([Si](C8=CC=CC=C8)(C9=CC=CC=C9)C%10=CC=CC=C%10)=C6O1)C%11=C5C=CC=C%11	3.25742	0.268405	1.38001	0.0908892	0.275374	0.0273396	0.0568038	0.615385	21.5996
119	Eur. J. Org. Chem. 2011, 3060	-66	Acetonitrile	S03ca	Nua04	Fba11	P03caNua04	-1	5	20	24	N#CC	O=C1C2=CC=CC=C2[C@@](C3=CNC4=C3C=C(Br)C=C4)(CC)N1	OC1(CC)NC(C2=CC=CC=C21)=O	5-bromo-1H-indole	BrC1=CC=C(NC=C2)C2=C1	II-S	O=P1(O)OC(C([Si](C2=CC=CC=C2)(C3=CC=CC=C3)C4=CC=CC=C4)=C5)=[C@]([C@]6=C(C=CC=C7)C7=CC([Si](C8=CC=CC=C8)(C9=CC=CC=C9)C%10=CC=CC=C%10)=C6O1)C%11=C5C=CC=C%11	3.25742	0.268405	1.38001	0.0908892	0.254958	0.0279845	0.133538	0.615385	21.5097
120	Eur. J. Org. Chem. 2011, 3060	-66	Acetonitrile	S03ca	Nua01	Fba11	P03caNua01	-1	5	10	60	N#CC	O=C1C2=CC=CC=C2[C@@](C3=CNC4=C3C=CC=C4)(CC)N1	OC1(CC)NC(C2=CC=CC=C21)=O	Indole	C12=CC=CC=C1C=CN2	II-S	O=P1(O)OC(C([Si](C2=CC=CC=C2)(C3=CC=CC=C3)C4=CC=CC=C4)=C5)=[C@]([C@]6=C(C=CC=C7)C7=CC([Si](C8=CC=CC=C8)(C9=CC=CC=C9)C%10=CC=CC=C%10)=C6O1)C%11=C5C=CC=C%11	3.25742	0.268405	1.38001	0.0908892	0.146649	0.0304457	0.151994	0.615385	21.5097
121	Eur. J. Org. Chem. 2011, 3060	-66	CHCl3	S03ca	Nua01	Fba11	P03caNua01	-1	5	20	8	ClC(Cl)Cl	O=C1C2=CC=CC=C2[C@@](C3=CNC4=C3C=CC=C4)(CC)N1	OC1(CC)NC(C2=CC=CC=C21)=O	Indole	C12=CC=CC=C1C=CN2	II-S	O=P1(O)OC(C([Si](C2=CC=CC=C2)(C3=CC=CC=C3)C4=CC=CC=C4)=C5)=[C@]([C@]6=C(C=CC=C7)C7=CC([Si](C8=CC=CC=C8)(C9=CC=CC=C9)C%10=CC=CC=C%10)=C6O1)C%11=C5C=CC=C%11	3.25742	0.268405	1.38001	0.0908892	0.146649	0.0304457	0.151994	0	21.5097
122	Eur. J. Org. Chem. 2011, 892	65	CHCl3	S03aa	Nua10	Fab04	P03aaNua10	1	5	20	60	ClC(Cl)Cl	O=C1C2=C(C=CC=C2)[C@H](C3=CNC4=C3C=C(F)C=C4)N1	OC1NC(C2=CC=CC=C21)=O	5-fluoro-1H-indole	FC1=CC=C(NC=C2)C2=C1	XXI-R	O=P1(O)OC(C(C2=CC=C(C=CC=C3)C3=C2)=C4)=[C@@]([C@@]5=C(CCCC6)C6=CC(C7=CC=C(C=CC=C8)C8=C7)=C5O1)C9=C4CCCC9	2.52678	0.344834	1.21556	0.102944	0.321285	0.0336	0.0211608	0	21.273
123	Angew.Chem. Int. Ed. 2012, 51,1046.	-65	CH2CL2	S04aa	Nuf07	Faa03	P04aaNuf07	-1	10	25	24	ClCCl	O=C([C@]1(C2=CNC3=C2C=CC=C3)CC(C4=CC=CC=C4)=O)NC5=C1C=CC=C5	O=C(C1(C2=CNC3=C2C=CC=C3)O)N([H])C4=C1C=CC=C4	Enamide 5a	C=C(NC(OC)=O)C1=CC=CC=C1	VII-S	O=P1(O)OC(C(C2=C(C=CC=C3)C3=CC4=C2C=CC=C4)=C5)=[C@]([C@]6=C(C=CC=C7)C7=CC(C8=C(C=CC=C9)C9=CC%10=C8C=CC=C%10)=C6O1)C%11=C5C=CC=C%11	3.41261	0.29396	1.61486	0.0874688	0.461744	0.027268	0.0461174	0	21.629
124	Eur. J. Org. Chem. 2011, 3060	-64	Et2O	S03ca	Nua01	Fba11	P03caNua01	-1	5	20	80	CCOCC	O=C1C2=CC=CC=C2[C@@](C3=CNC4=C3C=CC=C4)(CC)N1	OC1(CC)NC(C2=CC=CC=C21)=O	Indole	C12=CC=CC=C1C=CN2	II-S	O=P1(O)OC(C([Si](C2=CC=CC=C2)(C3=CC=CC=C3)C4=CC=CC=C4)=C5)=[C@]([C@]6=C(C=CC=C7)C7=CC([Si](C8=CC=CC=C8)(C9=CC=CC=C9)C%10=CC=CC=C%10)=C6O1)C%11=C5C=CC=C%11	3.25742	0.268405	1.38001	0.0908892	0.146649	0.0304457	0.151994	0	21.5097
125	J. Org. Chem. 2012, 77, 2986	63	THF	S01aa	Nua04	Faa10	P01aaNua04	1	2.5	25	48	C1CCCO1	O=C1C2=CC=CC=C2C3(C4=CNC5=C4C=C(Br)C=C5)N1CCC6=CC(OC)=C(OC)C=C63	O=C1C2=CC=CC=C2C3(O)N1CCC4=CC(OC)=C(OC)C=C43	5-bromoindole	BrC(C=C1)=CC2=C1NC=C2	IV-R	O=P1(O)OC([C@@]([C@@]2=C(C(C)C)C=C(C(C)C)C=C2C(C)C)=C3)=[C@@]([C@@]4=C(C=CC=C5)C5=CC(C6=C(C(C)C)C=C(C(C)C)C=C6C(C)C)=C4O1)C7=C3C=CC=C7	2.01504	0.283503	0.957275	0.0843007	0.254958	0.0296664	0.0978188	0	21.0388
126	Eur. J. Org. Chem. 2011, 3060	-63	1,2-dichloroethane	S03ca	Nua01	Fba11	P03caNua01	-1	5	20	36	ClCCCl	O=C1C2=CC=CC=C2[C@@](C3=CNC4=C3C=CC=C4)(CC)N1	OC1(CC)NC(C2=CC=CC=C21)=O	Indole	C12=CC=CC=C1C=CN2	II-S	O=P1(O)OC(C([Si](C2=CC=CC=C2)(C3=CC=CC=C3)C4=CC=CC=C4)=C5)=[C@]([C@]6=C(C=CC=C7)C7=CC([Si](C8=CC=CC=C8)(C9=CC=CC=C9)C%10=CC=CC=C%10)=C6O1)C%11=C5C=CC=C%11	3.25742	0.268405	1.38001	0.0908892	0.146649	0.0304457	0.151994	0	21.5097
127	Eur. J. Org. Chem. 2011, 3060	-63	CH2CL2	S03ca	Nua01	Fba11	P03caNua01	-1	5	20	12	ClCCl	O=C1C2=CC=CC=C2[C@@](C3=CNC4=C3C=CC=C4)(CC)N1	OC1(CC)NC(C2=CC=CC=C21)=O	Indole	C12=CC=CC=C1C=CN2	II-S	O=P1(O)OC(C([Si](C2=CC=CC=C2)(C3=CC=CC=C3)C4=CC=CC=C4)=C5)=[C@]([C@]6=C(C=CC=C7)C7=CC([Si](C8=CC=CC=C8)(C9=CC=CC=C9)C%10=CC=CC=C%10)=C6O1)C%11=C5C=CC=C%11	3.25742	0.268405	1.38001	0.0908892	0.146649	0.0304457	0.151994	0	21.5097
128	Org. Lett. 2013, 15, 2688.	-63	THF	S06aa	Nuc02	Fba11	P06aaNuc01	-1	5	25	6	C1CCCO1	O=C1C2=C(C=CC=C2)C(N1CC3)([H])C4=C3C5=C(N4)C=CC=C5	O=C1C2=C(C=CC=C2)C(N1CC3)(O)C4=C3C5=C(N4)C=CC=C5	Diethyl 1,4-dihydro-2,6-dimethyl-3,5-pyridinedicarboxylate	O=C(C1=C(C)NC(C)=C(C(OCC)=O)C1)OCC	II-S	O=P1(O)OC2=[C@]([C@]3=C(C=CC=C4)C4=CC([Si](C5=CC=CC=C5)(C6=CC=CC=C6)C7=CC=CC=C7)=C3O1)C8=CC=CC=C8C=C2[Si](C9=CC=CC=C9)(C%10=CC=CC=C%10)C%11=CC=CC=C%11	3.25742	0.268405	1.38001	0.0908892	0.484828	0.0308566	0.116958	0	21.6508
129	J. Org. Chem. 2012, 77, 2986	62	TBME	S01aa	Nua01	Faa10	P01aaNua01	1	20	-78	18	COC(C)(C)C	O=C1C2=CC=CC=C2C3(C4=CNC5=C4C=CC=C5)N1CCC6=CC(OC)=C(OC)C=C63	O=C1C2=CC=CC=C2C3(O)N1CCC4=CC(OC)=C(OC)C=C43	Indole	C1(C=CN2)=C2C=CC=C1	IV-R	O=P1(O)OC([C@@]([C@@]2=C(C(C)C)C=C(C(C)C)C=C2C(C)C)=C3)=[C@@]([C@@]4=C(C=CC=C5)C5=CC(C6=C(C(C)C)C=C(C(C)C)C=C6C(C)C)=C4O1)C7=C3C=CC=C7	2.01504	0.283503	0.957275	0.0843007	0.146649	0.0314631	0.106625	0	21.0388
130	J. Org. Chem. 2012, 77, 2986	62	THF	S01aa	Nua01	Faa10	P01aaNua01	1	20	-78	72	C1CCCO1	O=C1C2=CC=CC=C2C3(C4=CNC5=C4C=CC=C5)N1CCC6=CC(OC)=C(OC)C=C63	O=C1C2=CC=CC=C2C3(O)N1CCC4=CC(OC)=C(OC)C=C43	Indole	C1(C=CN2)=C2C=CC=C1	IV-R	O=P1(O)OC([C@@]([C@@]2=C(C(C)C)C=C(C(C)C)C=C2C(C)C)=C3)=[C@@]([C@@]4=C(C=CC=C5)C5=CC(C6=C(C(C)C)C=C(C(C)C)C=C6C(C)C)=C4O1)C7=C3C=CC=C7	2.01504	0.283503	0.957275	0.0843007	0.146649	0.0314631	0.106625	0	21.0388
131	Eur. J. Org. Chem. 2011, 3060	-62	Propanenitrile	S03ca	Nua01	Fba11	P03caNua01	-1	5	20	20	CCC#N	O=C1C2=CC=CC=C2[C@@](C3=CNC4=C3C=CC=C4)(CC)N1	OC1(CC)NC(C2=CC=CC=C21)=O	Indole	C12=CC=CC=C1C=CN2	II-S	O=P1(O)OC(C([Si](C2=CC=CC=C2)(C3=CC=CC=C3)C4=CC=CC=C4)=C5)=[C@]([C@]6=C(C=CC=C7)C7=CC([Si](C8=CC=CC=C8)(C9=CC=CC=C9)C%10=CC=CC=C%10)=C6O1)C%11=C5C=CC=C%11	3.25742	0.268405	1.38001	0.0908892	0.146649	0.0304457	0.151994	0.418301	21.5097
132	Eur. J. Org. Chem. 2011, 3060	-60	Acetonitrile	S03ca	Nua01	Fba11	P03caNua01	-1	2	20	45	N#CC	O=C1C2=CC=CC=C2[C@@](C3=CNC4=C3C=CC=C4)(CC)N1	OC1(CC)NC(C2=CC=CC=C21)=O	Indole	C12=CC=CC=C1C=CN2	II-S	O=P1(O)OC(C([Si](C2=CC=CC=C2)(C3=CC=CC=C3)C4=CC=CC=C4)=C5)=[C@]([C@]6=C(C=CC=C7)C7=CC([Si](C8=CC=CC=C8)(C9=CC=CC=C9)C%10=CC=CC=C%10)=C6O1)C%11=C5C=CC=C%11	3.25742	0.268405	1.38001	0.0908892	0.146649	0.0304457	0.151994	0.615385	21.5097
133	Eur. J. Org. Chem. 2011, 3060	-60	Benzonitrile	S03ca	Nua01	Fba11	P03caNua01	-1	5	20	45	N#CC1=CC=CC=C1	O=C1C2=CC=CC=C2[C@@](C3=CNC4=C3C=CC=C4)(CC)N1	OC1(CC)NC(C2=CC=CC=C21)=O	Indole	C12=CC=CC=C1C=CN2	II-S	O=P1(O)OC(C([Si](C2=CC=CC=C2)(C3=CC=CC=C3)C4=CC=CC=C4)=C5)=[C@]([C@]6=C(C=CC=C7)C7=CC([Si](C8=CC=CC=C8)(C9=CC=CC=C9)C%10=CC=CC=C%10)=C6O1)C%11=C5C=CC=C%11	3.25742	0.268405	1.38001	0.0908892	0.146649	0.0304457	0.151994	3.23432	21.5097
134	Angew.Chem. Int. Ed. 2012, 51,1046.	-60	CH2CL2	S04aa	Nuf02	Fba05	P04aaNuf07	-1	10	25	24	ClCCl	O=C([C@]1(C2=CNC3=C2C=CC=C3)CC(C4=CC=CC=C4)=O)NC5=C1C=CC=C5	O=C(C1(C2=CNC3=C2C=CC=C3)O)N([H])C4=C1C=CC=C4	Enamide 5d	C=C(NC(C1=CC=CC=C1)=O)C2=CC=CC=C2	VIII-S	O=P1(O)OC2=[C@]([C@]3=C(C=CC=C4)C4=CC(C5=CC=C(C=CC=C6)C6=C5)=C3O1)C7=CC=CC=C7C=C2C8=CC(C=CC=C9)=C9C=C8	3.31315	0.344834	1.5884	0.102944	0.198681	0.027268	0.0461174	0	21.629
135	Angew.Chem. Int. Ed. 2012, 51,1046.	-60	CH2CL2	S04ba	Nuf07	Fba05	P04baNuf07	-1	10	25	24	ClCCl	O=C([C@]1(C2=CN(C)C3=C2C=CC=C3)CC(C4=CC=CC=C4)=O)NC5=C1C=CC=C5	O=C(C1(C2=CN(C)C3=C2C=CC=C3)O)NC4=C1C=CC=C4	Enamide 5a	C=C(NC(OC)=O)C1=CC=CC=C1	VIII-S	O=P1(O)OC2=[C@]([C@]3=C(C=CC=C4)C4=CC(C5=CC=C(C=CC=C6)C6=C5)=C3O1)C7=CC=CC=C7C=C2C8=CC(C=CC=C9)=C9C=C8	3.31315	0.344834	1.5884	0.102944	0.461744	0.0277167	0.0597847	0	21.5073
136	Eur. J. Org. Chem. 2011, 892	59	CHCl3	S03aa	Nua07	Fab04	P03aaNua07	1	5	20	48	ClC(Cl)Cl	O=C1C2=C(C=CC=C2)[C@H](C3=CNC4=C3C=C(Cl)C=C4)N1	OC1NC(C2=CC=CC=C21)=O	5-chloro-1H-indole	ClC1=CC=C(NC=C2)C2=C1	XXI-R	O=P1(O)OC(C(C2=CC=C(C=CC=C3)C3=C2)=C4)=[C@@]([C@@]5=C(CCCC6)C6=CC(C7=CC=C(C=CC=C8)C8=C7)=C5O1)C9=C4CCCC9	2.52678	0.344834	1.21556	0.102944	0.275374	0.0319673	0.0209843	0	21.273
137	J. Org. Chem. 2012, 77, 2986	58	THF	S01aa	Nua04	Faa10	P01aaNua04	1	20	25	24	C1CCCO1	O=C1C2=CC=CC=C2C3(C4=CNC5=C4C=C(Br)C=C5)N1CCC6=CC(OC)=C(OC)C=C63	O=C1C2=CC=CC=C2C3(O)N1CCC4=CC(OC)=C(OC)C=C43	5-bromoindole	BrC(C=C1)=CC2=C1NC=C2	IV-R	O=P1(O)OC([C@@]([C@@]2=C(C(C)C)C=C(C(C)C)C=C2C(C)C)=C3)=[C@@]([C@@]4=C(C=CC=C5)C5=CC(C6=C(C(C)C)C=C(C(C)C)C=C6C(C)C)=C4O1)C7=C3C=CC=C7	2.01504	0.283503	0.957275	0.0843007	0.254958	0.0296664	0.0978188	0	21.0388
138	Eur. J. Org. Chem. 2011, 3060	-58	Acetonitrile	S03fa	Nua01	Fba11	P03faNua01	-1	5	20	29	N#CC	O=C1C2=CC=CC=C2[C@@](C3=CNC4=C3C=CC=C4)(C5=CC=CC=C5)N1	OC1(C2=CC=CC=C2)NC(C3=CC=CC=C31)=O	Indole	C12=CC=CC=C1C=CN2	II-S	O=P1(O)OC(C([Si](C2=CC=CC=C2)(C3=CC=CC=C3)C4=CC=CC=C4)=C5)=[C@]([C@]6=C(C=CC=C7)C7=CC([Si](C8=CC=CC=C8)(C9=CC=CC=C9)C%10=CC=CC=C%10)=C6O1)C%11=C5C=CC=C%11	3.25742	0.268405	1.38001	0.0908892	0.146649	0.0253082	0.0181329	0.615385	21.7688
139	Eur. J. Org. Chem. 2011, 892	57	CHCl3	S03aa	Nua24	Fab04	P03aaNua24	1	5	20	72	ClC(Cl)Cl	O=C1C2=C(C=CC=C2)[C@H](C3=CNC4=C3C=C(OCC5=CC=CC=C5)C=C4)N1	OC1NC(C2=CC=CC=C21)=O	5-(benzyloxy)-1H-indole	C1(OCC2=CC=CC=C2)=CC=C(NC=C3)C3=C1	XXI-R	O=P1(O)OC(C(C2=CC=C(C=CC=C3)C3=C2)=C4)=[C@@]([C@@]5=C(CCCC6)C6=CC(C7=CC=C(C=CC=C8)C8=C7)=C5O1)C9=C4CCCC9	2.52678	0.344834	1.21556	0.102944	0.179637	0.0285819	0.0342797	0	21.273
140	Eur. J. Org. Chem. 2011, 892	57	CHCl3	S03aa	Nua06	Fab04	P03aaNua06	1	5	20	60	ClC(Cl)Cl	O=C1C2=C(C=CC=C2)[C@H](C3=CNC4=C3C=CC(Cl)=C4)N1	OC1NC(C2=CC=CC=C21)=O	6-chloro-1H-indole	ClC1=CC=C2C(NC=C2)=C1	XXI-R	O=P1(O)OC(C(C2=CC=C(C=CC=C3)C3=C2)=C4)=[C@@]([C@@]5=C(CCCC6)C6=CC(C7=CC=C(C=CC=C8)C8=C7)=C5O1)C9=C4CCCC9	2.52678	0.344834	1.21556	0.102944	0.275374	0.0319673	0.0209843	0	21.273
141	Org.Lett.2009, 11,4620.	56	CH2CL2	S05aa	Nuf01	Fab03	P05aaNuf01	1	5	0	12	ClCCl	O=C(CC(C1=CC=CC=C1)C2=CNC3=C2C=CC=C3)C4=CC=CC=C4	OC(C1=CC=CC=C1)C2=CNC3=C2C=CC=C3	Enamide 1a	C=C(C1=CC=CC=C1)NC(C)=O	XX-R	O=P1(O)OC(C(C2=CC=CC=C2)=C3)=[C@@]([C@@]4=C(CCCC5)C5=CC(C6=CC=CC=C6)=C4O1)C7=C3CCCC7	2.22651	0.417002	1.09417	0.125071	0.278235	0.0138347	0.0522023	0	21.9791
142	Eur. J. Org. Chem. 2011, 892	56	Et2O	S03aa	Nua01	Fab04	P03aaNua01	1	5	20	120	CCOCC	O=C1C2=C(C=CC=C2)[C@H](C3=CNC4=C3C=CC=C4)N1	OC1NC(C2=CC=CC=C21)=O	Indole	C12=CC=CC=C1C=CN2	XXI-R	O=P1(O)OC(C(C2=CC=C(C=CC=C3)C3=C2)=C4)=[C@@]([C@@]5=C(CCCC6)C6=CC(C7=CC=C(C=CC=C8)C8=C7)=C5O1)C9=C4CCCC9	2.52678	0.344834	1.21556	0.102944	0.146649	0.0342038	0.0244598	0	21.273
143	ChemOpen, 2016, 5, 540	56	THF	S01aa	Nuf01	Faa10	P01aaNuf01	1	20	40	96	C1CCCO1	O=C1C2=CC=CC=C2C3(N1CCC4=CC(OC)=C(OC)C=C43)CC(C5=CC=CC=C5)=O	O=C1C2=CC=CC=C2C3(O)N1CCC4=CC(OC)=C(OC)C=C43	enamide	C=C(NC(C)=O)C1=CC=CC=C1	IV-R	O=P1(O)OC(C(C2=C(C(C)C)C=C(C(C)C)C=C2C(C)C)=C3)=C(C4=C(C=CC=C5)C5=CC(C6=C(C(C)C)C=C(C(C)C)C=C6C(C)C)=C4O1)C7=C3C=CC=C7	2.01504	0.283503	0.957275	0.0843007	0.278235	0.0275155	0.130222	0	21.0388
144	Eur. J. Org. Chem. 2011, 3060	-56	Acetonitrile	S03ba	Nua01	Fba11	P03baNua01	-1	5	20	12	N#CC	C[C@@]1(C2=CNC3=C2C=CC=C3)NC(C4=CC=CC=C41)=O	OC1(C)NC(C2=CC=CC=C21)=O	Indole	C12=CC=CC=C1C=CN2	II-S	O=P1(O)OC(C([Si](C2=CC=CC=C2)(C3=CC=CC=C3)C4=CC=CC=C4)=C5)=[C@]([C@]6=C(C=CC=C7)C7=CC([Si](C8=CC=CC=C8)(C9=CC=CC=C9)C%10=CC=CC=C%10)=C6O1)C%11=C5C=CC=C%11	3.25742	0.268405	1.38001	0.0908892	0.146649	0.0320734	0.0854405	0.615385	21.4103
145	Org. Lett. 2013, 15, 2688.	-55	EtOAc	S06aa	Nuc02	Fba11	P06aaNuc01	-1	5	25	24	CC(OCC)=O	O=C1C2=C(C=CC=C2)C(N1CC3)([H])C4=C3C5=C(N4)C=CC=C5	O=C1C2=C(C=CC=C2)C(N1CC3)(O)C4=C3C5=C(N4)C=CC=C5	Diethyl 1,4-dihydro-2,6-dimethyl-3,5-pyridinedicarboxylate	O=C(C1=C(C)NC(C)=C(C(OCC)=O)C1)OCC	II-S	O=P1(O)OC2=[C@]([C@]3=C(C=CC=C4)C4=CC([Si](C5=CC=CC=C5)(C6=CC=CC=C6)C7=CC=CC=C7)=C3O1)C8=CC=CC=C8C=C2[Si](C9=CC=CC=C9)(C%10=CC=CC=C%10)C%11=CC=CC=C%11	3.25742	0.268405	1.38001	0.0908892	0.484828	0.0308566	0.116958	0.258929	21.6508
146	Org.Lett.2009, 11,4620.	53	CH2CL2	S05aa	Nuf01	Fba13	P05aaNuf01	1	5	0	12	ClCCl	O=C(CC(C1=CC=CC=C1)C2=CNC3=C2C=CC=C3)C4=CC=CC=C4	OC(C1=CC=CC=C1)C2=CNC3=C2C=CC=C3	Enamide 1a	C=C(C1=CC=CC=C1)NC(C)=O	XXIII-R	O=P1(O)OC2=[C@@]([C@@]3=C(C=CC=C4)C4=CC(C5=CC=C(Cl)C=C5)=C3O1)C6=CC=CC=C6C=C2C7=CC=C(Cl)C=C7	2.84278	0.391107	1.42203	0.108407	0.278235	0.0138347	0.0522023	0	21.9791
147	Eur. J. Org. Chem. 2011, 892	52	Acetonitrile	S03aa	Nua01	Fab04	P03aaNua01	1	5	20	96	N#CC	O=C1C2=C(C=CC=C2)[C@H](C3=CNC4=C3C=CC=C4)N1	OC1NC(C2=CC=CC=C21)=O	Indole	C12=CC=CC=C1C=CN2	XXI-R	O=P1(O)OC(C(C2=CC=C(C=CC=C3)C3=C2)=C4)=[C@@]([C@@]5=C(CCCC6)C6=CC(C7=CC=C(C=CC=C8)C8=C7)=C5O1)C9=C4CCCC9	2.52678	0.344834	1.21556	0.102944	0.146649	0.0342038	0.0244598	0.615385	21.273
148	Org. Lett. 2013, 15, 2688.	-52	CH2CL2	S06aa	Nuc02	Fba11	P06aaNuc01	-1	5	25	3.5	ClCCl	O=C1C2=C(C=CC=C2)C(N1CC3)([H])C4=C3C5=C(N4)C=CC=C5	O=C1C2=C(C=CC=C2)C(N1CC3)(O)C4=C3C5=C(N4)C=CC=C5	Diethyl 1,4-dihydro-2,6-dimethyl-3,5-pyridinedicarboxylate	O=C(C1=C(C)NC(C)=C(C(OCC)=O)C1)OCC	II-S	O=P1(O)OC2=[C@]([C@]3=C(C=CC=C4)C4=CC([Si](C5=CC=CC=C5)(C6=CC=CC=C6)C7=CC=CC=C7)=C3O1)C8=CC=CC=C8C=C2[Si](C9=CC=CC=C9)(C%10=CC=CC=C%10)C%11=CC=CC=C%11	3.25742	0.268405	1.38001	0.0908892	0.484828	0.0308566	0.116958	0	21.6508
149	Org.Lett.2009, 11,4620.	51	CH2CL2	S05aa	Nuf01	Faa06	P05aaNuf01	1	5	0	12	ClCCl	O=C(CC(C1=CC=CC=C1)C2=CNC3=C2C=CC=C3)C4=CC=CC=C4	OC(C1=CC=CC=C1)C2=CNC3=C2C=CC=C3	Enamide 1a	C=C(C1=CC=CC=C1)NC(C)=O	VIa-R	O=P1(O)OC(C(C2=CC=CC=C2)=C3)=[C@@]([C@@]4=C(C=CC=C5)C5=CC(C6=CC=CC=C6)=C4O1)C7=C3C=CC=C7	3.17316	0.417002	1.55014	0.125071	0.278235	0.0138347	0.0522023	0	21.9791
150	Eur. J. Org. Chem. 2011, 892	51	CHCl3	S03aa	Nua11	Fab04	P03aaNua11	1	5	20	60	ClC(Cl)Cl	O=C1C2=C(C=CC=C2)[C@H](C3=CNC4=C3C=CC=C4C)N1	OC1NC(C2=CC=CC=C21)=O	7-methyl-1H-indole	CC1=C(NC=C2)C2=CC=C1	XXI-R	O=P1(O)OC(C(C2=CC=C(C=CC=C3)C3=C2)=C4)=[C@@]([C@@]5=C(CCCC6)C6=CC(C7=CC=C(C=CC=C8)C8=C7)=C5O1)C9=C4CCCC9	2.52678	0.344834	1.21556	0.102944	0.132215	0.0323752	0.0461614	0	21.273
151	Eur. J. Org. Chem. 2011, 3060	-51	CHCl3	S03ca	Nua01	Faa15	P03caNua01	-1	5	20	10	ClC(Cl)Cl	O=C1C2=CC=CC=C2[C@@](C3=CNC4=C3C=CC=C4)(CC)N1	OC1(CC)NC(C2=CC=CC=C21)=O	Indole	C12=CC=CC=C1C=CN2	XXV-S	O=P1(O)OC(C(P(C2=CC=CC=C2)(C3=CC=CC=C3)=O)=C4)=[C@]([C@]5=C(C=CC=C6)C6=CC(P(C7=CC=CC=C7)(C8=CC=CC=C8)=O)=C5O1)C9=C4C=CC=C9	2.88578	0.444733	1.36331	0.130612	0.146649	0.0304457	0.151994	0	21.5097
152	Eur. J. Org. Chem. 2011, 892	50	CHCl3	S03aa	Nua03	Fab04	P03aaNua03	1	5	20	96	ClC(Cl)Cl	O=C1C2=C(C=CC=C2)[C@H](C3=CNC4=C3C=C(OC)C=C4)N1	OC1NC(C2=CC=CC=C21)=O	5-methoxy-1H-indole	COC1=CC=C(NC=C2)C2=C1	XXI-R	O=P1(O)OC(C(C2=CC=C(C=CC=C3)C3=C2)=C4)=[C@@]([C@@]5=C(CCCC6)C6=CC(C7=CC=C(C=CC=C8)C8=C7)=C5O1)C9=C4CCCC9	2.52678	0.344834	1.21556	0.102944	0.296117	0.0391639	0.0461216	0	21.273
153	Eur. J. Org. Chem. 2011, 3060	-50	Toluene	S03ca	Nua01	Fba11	P03caNua01	-1	5	20	66	CC1=CC=CC=C1	O=C1C2=CC=CC=C2[C@@](C3=CNC4=C3C=CC=C4)(CC)N1	OC1(CC)NC(C2=CC=CC=C21)=O	Indole	C12=CC=CC=C1C=CN2	II-S	O=P1(O)OC(C([Si](C2=CC=CC=C2)(C3=CC=CC=C3)C4=CC=CC=C4)=C5)=[C@]([C@]6=C(C=CC=C7)C7=CC([Si](C8=CC=CC=C8)(C9=CC=CC=C9)C%10=CC=CC=C%10)=C6O1)C%11=C5C=CC=C%11	3.25742	0.268405	1.38001	0.0908892	0.146649	0.0304457	0.151994	3.27778	21.5097
154	Eur. J. Org. Chem. 2011, 892	49	CHCl3	S03aa	Nua01	Fab04	P03aaNua01	1	5	0	144	ClC(Cl)Cl	O=C1C2=C(C=CC=C2)[C@H](C3=CNC4=C3C=CC=C4)N1	OC1NC(C2=CC=CC=C21)=O	Indole	C12=CC=CC=C1C=CN2	XXI-R	O=P1(O)OC(C(C2=CC=C(C=CC=C3)C3=C2)=C4)=[C@@]([C@@]5=C(CCCC6)C6=CC(C7=CC=C(C=CC=C8)C8=C7)=C5O1)C9=C4CCCC9	2.52678	0.344834	1.21556	0.102944	0.146649	0.0342038	0.0244598	0	21.273
155	Eur. J. Org. Chem. 2011, 892	49	CHCl3	S03aa	Nua01	Fab04	P03aaNua01	1	5	20	144	ClC(Cl)Cl	O=C1C2=C(C=CC=C2)[C@H](C3=CNC4=C3C=CC=C4)N1	OC1NC(C2=CC=CC=C21)=O	Indole	C12=CC=CC=C1C=CN2	XXI-R	O=P1(O)OC(C(C2=CC=C(C=CC=C3)C3=C2)=C4)=[C@@]([C@@]5=C(CCCC6)C6=CC(C7=CC=C(C=CC=C8)C8=C7)=C5O1)C9=C4CCCC9	2.52678	0.344834	1.21556	0.102944	0.146649	0.0342038	0.0244598	0	21.273
156	J. Org. Chem. 2012, 77, 2986	49	DMF	S01aa	Nua01	Faa10	P01aaNua01	1	5	25	24	[H]C(N(C)C)=O	O=C1C2=CC=CC=C2C3(C4=CNC5=C4C=CC=C5)N1CCC6=CC(OC)=C(OC)C=C63	O=C1C2=CC=CC=C2C3(O)N1CCC4=CC(OC)=C(OC)C=C43	Indole	C1(C=CN2)=C2C=CC=C1	IV-R	O=P1(O)OC([C@@]([C@@]2=C(C(C)C)C=C(C(C)C)C=C2C(C)C)=C3)=[C@@]([C@@]4=C(C=CC=C5)C5=CC(C6=C(C(C)C)C=C(C(C)C)C=C6C(C)C)=C4O1)C7=C3C=CC=C7	2.01504	0.283503	0.957275	0.0843007	0.146649	0.0314631	0.106625	0.295125	21.0388
157	ChemOpen, 2016, 5, 540	49	THF	S01aa	Nuf01	Faa10	P01aaNuf01	1	20	40	96	C1CCCO1	O=C1C2=CC=CC=C2C3(N1CCC4=CC(OC)=C(OC)C=C43)CC(C5=CC=CC=C5)=O	O=C1C2=CC=CC=C2C3(O)N1CCC4=CC(OC)=C(OC)C=C43	enamide	C=C(NC(C)=O)C1=CC=CC=C1	IV-R	O=P1(O)OC(C(C2=C(C(C)C)C=C(C(C)C)C=C2C(C)C)=C3)=C(C4=C(C=CC=C5)C5=CC(C6=C(C(C)C)C=C(C(C)C)C=C6C(C)C)=C4O1)C7=C3C=CC=C7	2.01504	0.283503	0.957275	0.0843007	0.278235	0.0275155	0.130222	0	21.0388
158	Org. Lett. 2013, 15, 2688.	-49	CH2CL2	S06aa	Nuc02	Faa14	P06aaNuc01	-1	5	25	6	ClCCl	O=C1C2=C(C=CC=C2)C(N1CC3)([H])C4=C3C5=C(N4)C=CC=C5	O=C1C2=C(C=CC=C2)C(N1CC3)(O)C4=C3C5=C(N4)C=CC=C5	Diethyl 1,4-dihydro-2,6-dimethyl-3,5-pyridinedicarboxylate	O=C(C1=C(C)NC(C)=C(C(OCC)=O)C1)OCC	XXIV-S	O=P1(O)OC2=[C@]([C@]3=C(C=CC=C4)C4=CC(C5=CC=C(C6=CC=CC=C6)C=C5)=C3O1)C7=CC=CC=C7C=C2C8=CC=C(C9=CC=CC=C9)C=C8	3.36676	0.317371	1.60274	0.0945774	0.484828	0.0308566	0.116958	0	21.6508
159	Eur. J. Org. Chem. 2011, 892	48	1,2-dichloroethane	S03aa	Nua01	Fab04	P03aaNua01	1	5	20	60	ClCCCl	O=C1C2=C(C=CC=C2)[C@H](C3=CNC4=C3C=CC=C4)N1	OC1NC(C2=CC=CC=C21)=O	Indole	C12=CC=CC=C1C=CN2	XXI-R	O=P1(O)OC(C(C2=CC=C(C=CC=C3)C3=C2)=C4)=[C@@]([C@@]5=C(CCCC6)C6=CC(C7=CC=C(C=CC=C8)C8=C7)=C5O1)C9=C4CCCC9	2.52678	0.344834	1.21556	0.102944	0.146649	0.0342038	0.0244598	0	21.273
160	Org.Lett.2009, 11,4620.	48	CH2CL2	S05aa	Nuf01	Faa18	P05aaNuf01	1	5	0	4	ClCCl	O=C(CC(C1=CC=CC=C1)C2=CNC3=C2C=CC=C3)C4=CC=CC=C4	OC(C1=CC=CC=C1)C2=CNC3=C2C=CC=C3	Enamide 1a	C=C(C1=CC=CC=C1)NC(C)=O	XXXV-R	O=P1(O)OC2=[C@@]([C@@]3=C(C=CC=C4)C4=CC(C5=CC=C(C(C)(C)C)C=C5)=C3O1)C6=CC=CC=C6C=C2C7=CC=C(C(C)(C)C)C=C7	2.56301	0.344834	1.23299	0.102944	0.278235	0.0138347	0.0522023	0	21.9791
161	J. Org. Chem. 2012, 77, 2986	48	TBME	S01aa	Nua01	Faa10	P01aaNua01	1	20	-78	0.5	COC(C)(C)C	O=C1C2=CC=CC=C2C3(C4=CNC5=C4C=CC=C5)N1CCC6=CC(OC)=C(OC)C=C63	O=C1C2=CC=CC=C2C3(O)N1CCC4=CC(OC)=C(OC)C=C43	Indole	C1(C=CN2)=C2C=CC=C1	IV-R	O=P1(O)OC([C@@]([C@@]2=C(C(C)C)C=C(C(C)C)C=C2C(C)C)=C3)=[C@@]([C@@]4=C(C=CC=C5)C5=CC(C6=C(C(C)C)C=C(C(C)C)C=C6C(C)C)=C4O1)C7=C3C=CC=C7	2.01504	0.283503	0.957275	0.0843007	0.146649	0.0314631	0.106625	0	21.0388
162	Eur. J. Org. Chem. 2011, 892	47	CHCl3	S03aa	Nua01	Fab03	P03aaNua01	1	5	20	96	ClC(Cl)Cl	O=C1C2=C(C=CC=C2)[C@H](C3=CNC4=C3C=CC=C4)N1	OC1NC(C2=CC=CC=C21)=O	Indole	C12=CC=CC=C1C=CN2	XX-R	O=P1(O)OC(C(C2=CC=CC=C2)=C3)=[C@@]([C@@]4=C(CCCC5)C5=CC(C6=CC=CC=C6)=C4O1)C7=C3CCCC7	2.22651	0.417002	1.09417	0.125071	0.146649	0.0342038	0.0244598	0	21.273
163	Eur. J. Org. Chem. 2011, 892	46	CHCl3	S03aa	Nua01	Fab04	P03aaNua01	1	5	20	144	ClC(Cl)Cl	O=C1C2=C(C=CC=C2)[C@H](C3=CNC4=C3C=CC=C4)N1	OC1NC(C2=CC=CC=C21)=O	Indole	C12=CC=CC=C1C=CN2	XXI-R	O=P1(O)OC(C(C2=CC=C(C=CC=C3)C3=C2)=C4)=[C@@]([C@@]5=C(CCCC6)C6=CC(C7=CC=C(C=CC=C8)C8=C7)=C5O1)C9=C4CCCC9	2.52678	0.344834	1.21556	0.102944	0.146649	0.0342038	0.0244598	0	21.273
164	ChemOpen, 2016, 5, 540	45	THF	S01aa	Nuf01	Faa10	P01aaNuf01	1	20	66	60	C1CCCO1	O=C1C2=CC=CC=C2C3(N1CCC4=CC(OC)=C(OC)C=C43)CC(C5=CC=CC=C5)=O	O=C1C2=CC=CC=C2C3(O)N1CCC4=CC(OC)=C(OC)C=C43	enamide	C=C(NC(C)=O)C1=CC=CC=C1	IV-R	O=P1(O)OC(C(C2=C(C(C)C)C=C(C(C)C)C=C2C(C)C)=C3)=C(C4=C(C=CC=C5)C5=CC(C6=C(C(C)C)C=C(C(C)C)C=C6C(C)C)=C4O1)C7=C3C=CC=C7	2.01504	0.283503	0.957275	0.0843007	0.278235	0.0275155	0.130222	0	21.0388
165	Eur. J. Org. Chem. 2011, 892	45	THF	S03aa	Nua01	Fab04	P03aaNua01	1	5	20	120	C1CCCO1	O=C1C2=C(C=CC=C2)[C@H](C3=CNC4=C3C=CC=C4)N1	OC1NC(C2=CC=CC=C21)=O	Indole	C12=CC=CC=C1C=CN2	XXI-R	O=P1(O)OC(C(C2=CC=C(C=CC=C3)C3=C2)=C4)=[C@@]([C@@]5=C(CCCC6)C6=CC(C7=CC=C(C=CC=C8)C8=C7)=C5O1)C9=C4CCCC9	2.52678	0.344834	1.21556	0.102944	0.146649	0.0342038	0.0244598	0	21.273
166	J. Org. Chem. 2012, 77, 2986	44	DMF	S01aa	Nua01	Faa10	P01aaNua01	1	10	25	24	[H]C(N(C)C)=O	O=C1C2=CC=CC=C2C3(C4=CNC5=C4C=CC=C5)N1CCC6=CC(OC)=C(OC)C=C63	O=C1C2=CC=CC=C2C3(O)N1CCC4=CC(OC)=C(OC)C=C43	Indole	C1(C=CN2)=C2C=CC=C1	IV-R	O=P1(O)OC([C@@]([C@@]2=C(C(C)C)C=C(C(C)C)C=C2C(C)C)=C3)=[C@@]([C@@]4=C(C=CC=C5)C5=CC(C6=C(C(C)C)C=C(C(C)C)C=C6C(C)C)=C4O1)C7=C3C=CC=C7	2.01504	0.283503	0.957275	0.0843007	0.146649	0.0314631	0.106625	0.295125	21.0388
167	J. Org. Chem. 2012, 77, 2986	44	DMF	S01aa	Nua01	Faa10	P01aaNua01	1	20	25	24	[H]C(N(C)C)=O	O=C1C2=CC=CC=C2C3(C4=CNC5=C4C=CC=C5)N1CCC6=CC(OC)=C(OC)C=C63	O=C1C2=CC=CC=C2C3(O)N1CCC4=CC(OC)=C(OC)C=C43	Indole	C1(C=CN2)=C2C=CC=C1	IV-R	O=P1(O)OC([C@@]([C@@]2=C(C(C)C)C=C(C(C)C)C=C2C(C)C)=C3)=[C@@]([C@@]4=C(C=CC=C5)C5=CC(C6=C(C(C)C)C=C(C(C)C)C=C6C(C)C)=C4O1)C7=C3C=CC=C7	2.01504	0.283503	0.957275	0.0843007	0.146649	0.0314631	0.106625	0.295125	21.0388
168	Org. Lett. 2013, 15, 2688.	-44	CH2CL2	S06aa	Nuc02	Fba05	P06aaNuc01	-1	5	25	10	ClCCl	O=C1C2=C(C=CC=C2)C(N1CC3)([H])C4=C3C5=C(N4)C=CC=C5	O=C1C2=C(C=CC=C2)C(N1CC3)(O)C4=C3C5=C(N4)C=CC=C5	Diethyl 1,4-dihydro-2,6-dimethyl-3,5-pyridinedicarboxylate	O=C(C1=C(C)NC(C)=C(C(OCC)=O)C1)OCC	VIII-S	O=P1(O)OC2=[C@]([C@]3=C(C=CC=C4)C4=CC(C5=CC=C(C=CC=C6)C6=C5)=C3O1)C7=CC=CC=C7C=C2C8=CC(C=CC=C9)=C9C=C8	3.31315	0.344834	1.5884	0.102944	0.484828	0.0308566	0.116958	0	21.6508
169	Eur. J. Org. Chem. 2011, 892	43	CHCl3	S03aa	Nua23	Fab04	P03aaNua23	1	5	20	60	ClC(Cl)Cl	O=C1C2=C(C=CC=C2)[C@H](C3=CNC4=C3C=CC(OCC5=CC=CC=C5)=C4)N1	OC1NC(C2=CC=CC=C21)=O	6-(benzyloxy)-1H-indole	C1(OCC2=CC=CC=C2)=CC=C3C(NC=C3)=C1	XXI-R	O=P1(O)OC(C(C2=CC=C(C=CC=C3)C3=C2)=C4)=[C@@]([C@@]5=C(CCCC6)C6=CC(C7=CC=C(C=CC=C8)C8=C7)=C5O1)C9=C4CCCC9	2.52678	0.344834	1.21556	0.102944	0.179637	0.0285819	0.0342797	0	21.273
170	Eur. J. Org. Chem. 2011, 892	43	CHCl3	S03aa	Nua01	Fab04	P03aaNua01	1	5	40	17	ClC(Cl)Cl	O=C1C2=C(C=CC=C2)[C@H](C3=CNC4=C3C=CC=C4)N1	OC1NC(C2=CC=CC=C21)=O	Indole	C12=CC=CC=C1C=CN2	XXI-R	O=P1(O)OC(C(C2=CC=C(C=CC=C3)C3=C2)=C4)=[C@@]([C@@]5=C(CCCC6)C6=CC(C7=CC=C(C=CC=C8)C8=C7)=C5O1)C9=C4CCCC9	2.52678	0.344834	1.21556	0.102944	0.146649	0.0342038	0.0244598	0	21.273
171	ChemOpen, 2016, 5, 540	43	THF	S01aa	Nuf01	Faa10	P01aaNuf01	1	20	40	96	C1CCCO1	O=C1C2=CC=CC=C2C3(N1CCC4=CC(OC)=C(OC)C=C43)CC(C5=CC=CC=C5)=O	O=C1C2=CC=CC=C2C3(O)N1CCC4=CC(OC)=C(OC)C=C43	enamide	C=C(NC(C)=O)C1=CC=CC=C1	IV-R	O=P1(O)OC(C(C2=C(C(C)C)C=C(C(C)C)C=C2C(C)C)=C3)=C(C4=C(C=CC=C5)C5=CC(C6=C(C(C)C)C=C(C(C)C)C=C6C(C)C)=C4O1)C7=C3C=CC=C7	2.01504	0.283503	0.957275	0.0843007	0.278235	0.0275155	0.130222	0	21.0388
172	Eur. J. Org. Chem. 2011, 892	42	CHCl3	S03aa	Nua01	Fab05	P03aaNua01	1	5	20	240	ClC(Cl)Cl	O=C1C2=C(C=CC=C2)[C@H](C3=CNC4=C3C=CC=C4)N1	OC1NC(C2=CC=CC=C21)=O	Indole	C12=CC=CC=C1C=CN2	XXII-R	O=P1(O)OC(C(C2=CC(C=CC=C3)=C3C4=C2C=CC=C4)=C5)=[C@@]([C@@]6=C(CCCC7)C7=CC(C8=CC(C=CC=C9)=C9C%10=C8C=CC=C%10)=C6O1)C%11=C5CCCC%11	2.7401	0.29396	1.29951	0.0874688	0.146649	0.0342038	0.0244598	0	21.273
173	Eur. J. Org. Chem. 2011, 892	42	CHCl3	S03aa	Nua33	Fab04	P03aaNua33	1	5	20	72	ClC(Cl)Cl	O=C1C2=C(C=CC=C2)[C@H](C3=CN(C)C4=C3C=CC=C4)N1	OC1NC(C2=CC=CC=C21)=O	1-methyl-1H-indole	CN1C2=CC=CC=C2C=C1	XXI-R	O=P1(O)OC(C(C2=CC=C(C=CC=C3)C3=C2)=C4)=[C@@]([C@@]5=C(CCCC6)C6=CC(C7=CC=C(C=CC=C8)C8=C7)=C5O1)C9=C4CCCC9	2.52678	0.344834	1.21556	0.102944	0.148845	0.0344845	0.0461614	0	21.273
174	J. Org. Chem. 2012, 77, 2986	42	TBME	S01aa	Nua01	Faa10	P01aaNua01	1	20	-78	0.5	COC(C)(C)C	O=C1C2=CC=CC=C2C3(C4=CNC5=C4C=CC=C5)N1CCC6=CC(OC)=C(OC)C=C63	O=C1C2=CC=CC=C2C3(O)N1CCC4=CC(OC)=C(OC)C=C43	Indole	C1(C=CN2)=C2C=CC=C1	IV-R	O=P1(O)OC([C@@]([C@@]2=C(C(C)C)C=C(C(C)C)C=C2C(C)C)=C3)=[C@@]([C@@]4=C(C=CC=C5)C5=CC(C6=C(C(C)C)C=C(C(C)C)C=C6C(C)C)=C4O1)C7=C3C=CC=C7	2.01504	0.283503	0.957275	0.0843007	0.146649	0.0314631	0.106625	0	21.0388
175	Eur. J. Org. Chem. 2011, 892	42	Toluene	S03aa	Nua01	Fab04	P03aaNua01	1	5	20	132	CC1=CC=CC=C1	O=C1C2=C(C=CC=C2)[C@H](C3=CNC4=C3C=CC=C4)N1	OC1NC(C2=CC=CC=C21)=O	Indole	C12=CC=CC=C1C=CN2	XXI-R	O=P1(O)OC(C(C2=CC=C(C=CC=C3)C3=C2)=C4)=[C@@]([C@@]5=C(CCCC6)C6=CC(C7=CC=C(C=CC=C8)C8=C7)=C5O1)C9=C4CCCC9	2.52678	0.344834	1.21556	0.102944	0.146649	0.0342038	0.0244598	3.27778	21.273
176	Org.Lett.2009, 11,4620.	41	CH2CL2	S05aa	Nuf01	Faa05	P05aaNuf01	1	5	0	12	ClCCl	O=C(CC(C1=CC=CC=C1)C2=CNC3=C2C=CC=C3)C4=CC=CC=C4	OC(C1=CC=CC=C1)C2=CNC3=C2C=CC=C3	Enamide 1a	C=C(C1=CC=CC=C1)NC(C)=O	VIII-R	O=P1(O)OC(C(C2=CC=C(C=CC=C3)C3=C2)=C4)=[C@@]([C@@]5=C(C=CC=C6)C6=CC(C7=CC=C(C=CC=C8)C8=C7)=C5O1)C9=C4C=CC=C9	3.31315	0.344834	1.5884	0.102944	0.278235	0.0138347	0.0522023	0	21.9791
177	Org. Lett. 2013, 15, 2688.	-41	Toluene	S06aa	Nuc02	Fba11	P06aaNuc01	-1	5	25	2.5	CC1=CC=CC=C1	O=C1C2=C(C=CC=C2)C(N1CC3)([H])C4=C3C5=C(N4)C=CC=C5	O=C1C2=C(C=CC=C2)C(N1CC3)(O)C4=C3C5=C(N4)C=CC=C5	Diethyl 1,4-dihydro-2,6-dimethyl-3,5-pyridinedicarboxylate	O=C(C1=C(C)NC(C)=C(C(OCC)=O)C1)OCC	II-S	O=P1(O)OC2=[C@]([C@]3=C(C=CC=C4)C4=CC([Si](C5=CC=CC=C5)(C6=CC=CC=C6)C7=CC=CC=C7)=C3O1)C8=CC=CC=C8C=C2[Si](C9=CC=CC=C9)(C%10=CC=CC=C%10)C%11=CC=CC=C%11	3.25742	0.268405	1.38001	0.0908892	0.484828	0.0308566	0.116958	3.27778	21.6508
178	J. Org. Chem. 2012, 77, 2986	40	Acetonitrile	S01aa	Nua01	Faa10	P01aaNua01	1	20	-10	2	N#CC	O=C1C2=CC=CC=C2C3(C4=CNC5=C4C=CC=C5)N1CCC6=CC(OC)=C(OC)C=C63	O=C1C2=CC=CC=C2C3(O)N1CCC4=CC(OC)=C(OC)C=C43	Indole	C1(C=CN2)=C2C=CC=C1	IV-R	O=P1(O)OC([C@@]([C@@]2=C(C(C)C)C=C(C(C)C)C=C2C(C)C)=C3)=[C@@]([C@@]4=C(C=CC=C5)C5=CC(C6=C(C(C)C)C=C(C(C)C)C=C6C(C)C)=C4O1)C7=C3C=CC=C7	2.01504	0.283503	0.957275	0.0843007	0.146649	0.0314631	0.106625	0.615385	21.0388
179	J. Org. Chem. 2012, 77, 2986	40	THF	S01aa	Nua01	Faa10	P01aaNua01	1	2.5	25	4.5	C1CCCO1	O=C1C2=CC=CC=C2C3(C4=CNC5=C4C=CC=C5)N1CCC6=CC(OC)=C(OC)C=C63	O=C1C2=CC=CC=C2C3(O)N1CCC4=CC(OC)=C(OC)C=C43	Indole	C1(C=CN2)=C2C=CC=C1	IV-R	O=P1(O)OC([C@@]([C@@]2=C(C(C)C)C=C(C(C)C)C=C2C(C)C)=C3)=[C@@]([C@@]4=C(C=CC=C5)C5=CC(C6=C(C(C)C)C=C(C(C)C)C=C6C(C)C)=C4O1)C7=C3C=CC=C7	2.01504	0.283503	0.957275	0.0843007	0.146649	0.0314631	0.106625	0	21.0388
180	J. Org. Chem. 2012, 77, 2986	40	THF	S01aa	Nua01	Faa10	P01aaNua01	1	20	25	0.5	C1CCCO1	O=C1C2=CC=CC=C2C3(C4=CNC5=C4C=CC=C5)N1CCC6=CC(OC)=C(OC)C=C63	O=C1C2=CC=CC=C2C3(O)N1CCC4=CC(OC)=C(OC)C=C43	Indole	C1(C=CN2)=C2C=CC=C1	IV-R	O=P1(O)OC([C@@]([C@@]2=C(C(C)C)C=C(C(C)C)C=C2C(C)C)=C3)=[C@@]([C@@]4=C(C=CC=C5)C5=CC(C6=C(C(C)C)C=C(C(C)C)C=C6C(C)C)=C4O1)C7=C3C=CC=C7	2.01504	0.283503	0.957275	0.0843007	0.146649	0.0314631	0.106625	0	21.0388
181	J. Org. Chem. 2012, 77, 2986	38	Acetonitrile	S01aa	Nua01	Faa10	P01aaNua01	1	20	25	2	N#CC	O=C1C2=CC=CC=C2C3(C4=CNC5=C4C=CC=C5)N1CCC6=CC(OC)=C(OC)C=C63	O=C1C2=CC=CC=C2C3(O)N1CCC4=CC(OC)=C(OC)C=C43	Indole	C1(C=CN2)=C2C=CC=C1	IV-R	O=P1(O)OC([C@@]([C@@]2=C(C(C)C)C=C(C(C)C)C=C2C(C)C)=C3)=[C@@]([C@@]4=C(C=CC=C5)C5=CC(C6=C(C(C)C)C=C(C(C)C)C=C6C(C)C)=C4O1)C7=C3C=CC=C7	2.01504	0.283503	0.957275	0.0843007	0.146649	0.0314631	0.106625	0.615385	21.0388
182	Org.Lett.2009, 11,4620.	38	CH2CL2	S05aa	Nuf01	Fab06	P05aaNuf01	1	5	0	20	ClCCl	O=C(CC(C1=CC=CC=C1)C2=CNC3=C2C=CC=C3)C4=CC=CC=C4	OC(C1=CC=CC=C1)C2=CNC3=C2C=CC=C3	Enamide 1a	C=C(C1=CC=CC=C1)NC(C)=O	XXXVI-R	O=P1(O)OC(C(C2=CC(C(F)(F)F)=CC(C(F)(F)F)=C2)=C3)=[C@@]([C@@]4=C(CCCC5)C5=CC(C6=CC(C(F)(F)F)=CC(C(F)(F)F)=C6)=C4O1)C7=C3CCCC7	1.25142	0.267093	0.840652	0.0633052	0.278235	0.0138347	0.0522023	0	21.9791
183	J. Org. Chem. 2012, 77, 2986	38	THF	S01aa	Nua33	Faa10	P01aaNua33	1	20	25	24	C1CCCO1	O=C1C2=CC=CC=C2C3(C4=CN(C)C5=C4C=CC=C5)N1CCC6=CC(OC)=C(OC)C=C63	O=C1C2=CC=CC=C2C3(O)N1CCC4=CC(OC)=C(OC)C=C43	N-methylindole	CN1C=CC2=C1C=CC=C2	IV-R	O=P1(O)OC([C@@]([C@@]2=C(C(C)C)C=C(C(C)C)C=C2C(C)C)=C3)=[C@@]([C@@]4=C(C=CC=C5)C5=CC(C6=C(C(C)C)C=C(C(C)C)C=C6C(C)C)=C4O1)C7=C3C=CC=C7	2.01504	0.283503	0.957275	0.0843007	0.148845	0.0317329	0.116903	0	21.0388
184	J. Org. Chem. 2012, 77, 2986	36	TBME	S01aa	Nua03	Faa10	P01aaNua03	1	20	25	0.5	COC(C)(C)C	O=C1C2=CC=CC=C2C3(C4=CNC5=C4C=C(OC)C=C5)N1CCC6=CC(OC)=C(OC)C=C63	O=C1C2=CC=CC=C2C3(O)N1CCC4=CC(OC)=C(OC)C=C43	5-methoxiindole	COC1=CC(C=CN2)=C2C=C1	IV-R	O=P1(O)OC([C@@]([C@@]2=C(C(C)C)C=C(C(C)C)C=C2C(C)C)=C3)=[C@@]([C@@]4=C(C=CC=C5)C5=CC(C6=C(C(C)C)C=C(C(C)C)C=C6C(C)C)=C4O1)C7=C3C=CC=C7	2.01504	0.283503	0.957275	0.0843007	0.296117	0.0347561	0.114301	0	21.0388
185	Eur. J. Org. Chem. 2011, 3060	35	CHCl3	S03ca	Nua01	Fab01	P03caNua01	1	5	20	1	ClC(Cl)Cl	O=C1C2=CC=CC=C2[C@@](C3=CNC4=C3C=CC=C4)(CC)N1	OC1(CC)NC(C2=CC=CC=C21)=O	Indole	C12=CC=CC=C1C=CN2	XXVI-R	O=P1(O)OC(C(C2=CC=C(Cl)C=C2)=C3)=[C@@]([C@@]4=C(CCCC5)C5=CC(C6=CC=C(Cl)C=C6)=C4O1)C7=C3CCCC7	1.97363	0.391107	0.995504	0.108407	0.146649	0.0304457	0.151994	0	21.5097
186	Org.Lett.2009, 11,4620.	33	CH2CL2	S05aa	Nuf01	Faa11	P05aaNuf01	1	5	0	12	ClCCl	O=C(CC(C1=CC=CC=C1)C2=CNC3=C2C=CC=C3)C4=CC=CC=C4	OC(C1=CC=CC=C1)C2=CNC3=C2C=CC=C3	Enamide 1a	C=C(C1=CC=CC=C1)NC(C)=O	II-R	O=P1(O)OC(C([Si](C2=CC=CC=C2)(C3=CC=CC=C3)C4=CC=CC=C4)=C5)=C(C6=C(C=CC=C7)C7=CC([Si](C8=CC=CC=C8)(C9=CC=CC=C9)C%10=CC=CC=C%10)=C6O1)C%11=C5C=CC=C%11	3.25742	0.268405	1.38001	0.0908892	0.278235	0.0138347	0.0522023	0	21.9791
187	Eur. J. Org. Chem. 2011, 892	-33	CHCl3	S03aa	Nua01	Faa16	P03aaNua01	-1	5	20	132	ClC(Cl)Cl	O=C1C2=C(C=CC=C2)[C@H](C3=CNC4=C3C=CC=C4)N1	OC1NC(C2=CC=CC=C21)=O	Indole	C12=CC=CC=C1C=CN2	XIX-S	O=P1(O)OC(C(C2=CC=C(C)C=C2)=C3)=[C@]([C@]4=C(C=CC=C5)C5=CC(C6=CC=C(C)C=C6)=C4O1)C7=C3C=CC=C7	2.96813	0.396269	1.44378	0.118693	0.146649	0.0342038	0.0244598	0	21.273
188	Eur. J. Org. Chem. 2011, 892	32	CHCl3	S03aa	Nua25	Fab04	P03aaNua25	1	5	20	72	ClC(Cl)Cl	O=C1C2=C(C=CC=C2)[C@H](C3=CNC4=C3C(OCC5=CC=CC=C5)=CC=C4)N1	OC1NC(C2=CC=CC=C21)=O	4-(benzyloxy)-1H-indole	C12=CC=CC(OCC3=CC=CC=C3)=C1C=CN2	XXI-R	O=P1(O)OC(C(C2=CC=C(C=CC=C3)C3=C2)=C4)=[C@@]([C@@]5=C(CCCC6)C6=CC(C7=CC=C(C=CC=C8)C8=C7)=C5O1)C9=C4CCCC9	2.52678	0.344834	1.21556	0.102944	0.179637	0.0285819	0.0342797	0	21.273
189	J. Org. Chem. 2012, 77, 2986	32	EtOH	S01aa	Nua01	Faa10	P01aaNua01	1	20	25	24	CCO	O=C1C2=CC=CC=C2C3(C4=CNC5=C4C=CC=C5)N1CCC6=CC(OC)=C(OC)C=C63	O=C1C2=CC=CC=C2C3(O)N1CCC4=CC(OC)=C(OC)C=C43	Indole	C1(C=CN2)=C2C=CC=C1	IV-R	O=P1(O)OC([C@@]([C@@]2=C(C(C)C)C=C(C(C)C)C=C2C(C)C)=C3)=[C@@]([C@@]4=C(C=CC=C5)C5=CC(C6=C(C(C)C)C=C(C(C)C)C=C6C(C)C)=C4O1)C7=C3C=CC=C7	2.01504	0.283503	0.957275	0.0843007	0.146649	0.0314631	0.106625	0	21.0388
190	J. Org. Chem. 2012, 77, 2986	32	TBME	S01aa	Nua01	Faa10	P01aaNua01	1	20	-78	0.5	COC(C)(C)C	O=C1C2=CC=CC=C2C3(C4=CNC5=C4C=CC=C5)N1CCC6=CC(OC)=C(OC)C=C63	O=C1C2=CC=CC=C2C3(O)N1CCC4=CC(OC)=C(OC)C=C43	Indole	C1(C=CN2)=C2C=CC=C1	IV-R	O=P1(O)OC([C@@]([C@@]2=C(C(C)C)C=C(C(C)C)C=C2C(C)C)=C3)=[C@@]([C@@]4=C(C=CC=C5)C5=CC(C6=C(C(C)C)C=C(C(C)C)C=C6C(C)C)=C4O1)C7=C3C=CC=C7	2.01504	0.283503	0.957275	0.0843007	0.146649	0.0314631	0.106625	0	21.0388
191	J. Org. Chem. 2012, 77, 2986	32	THF	S01aa	Nua01	Faa11	P01aaNua01	1	20	25	24	C1CCCO1	O=C1C2=CC=CC=C2C3(C4=CNC5=C4C=CC=C5)N1CCC6=CC(OC)=C(OC)C=C63	O=C1C2=CC=CC=C2C3(O)N1CCC4=CC(OC)=C(OC)C=C43	Indole	C1(C=CN2)=C2C=CC=C1	II-R	O=P1(O)OC(C([Si](C2=CC=CC=C2)(C3=CC=CC=C3)C4=CC=CC=C4)=C5)=[C@@]([C@@]6=C(C=CC=C7)C7=CC([Si](C8=CC=CC=C8)(C9=CC=CC=C9)C%10=CC=CC=C%10)=C6O1)C%11=C5C=CC=C%11	3.25742	0.268405	1.38001	0.0908892	0.146649	0.0314631	0.106625	0	21.0388
192	ChemOpen, 2016, 5, 540	31	THF	S01aa	Nuf01	Faa04	P01aaNuf01	1	20	25	96	C1CCCO1	O=C1C2=CC=CC=C2C3(N1CCC4=CC(OC)=C(OC)C=C43)CC(C5=CC=CC=C5)=O	O=C1C2=CC=CC=C2C3(O)N1CCC4=CC(OC)=C(OC)C=C43	enamide	C=C(NC(C)=O)C1=CC=CC=C1	III-R	O=P1(O)OC(C(C2=CC(C=CC=C3)=C3C4=C2C=CC=C4)=C5)=[C@@]([C@@]6=C(C=CC=C7)C7=CC(C8=C(C=CC=C9)C9=C(C=CC=C%10)C%10=C8)=C6O1)C%11=C5C=CC=C%11	3.41261	0.29396	1.61486	0.0874688	0.278235	0.0275155	0.130222	0	21.0388
193	Org. Lett. 2013, 15, 2688.	-29	CH2CL2	S06aa	Nuc02	Fba10	P06aaNuc01	-1	5	25	4	ClCCl	O=C1C2=C(C=CC=C2)C(N1CC3)([H])C4=C3C5=C(N4)C=CC=C5	O=C1C2=C(C=CC=C2)C(N1CC3)(O)C4=C3C5=C(N4)C=CC=C5	Diethyl 1,4-dihydro-2,6-dimethyl-3,5-pyridinedicarboxylate	O=C(C1=C(C)NC(C)=C(C(OCC)=O)C1)OCC	IV-S	O=P1(O)OC2=[C@]([C@]3=C(C=CC=C4)C4=CC(C5=C(C(C)C)C=C(C(C)C)C=C5C(C)C)=C3O1)C6=CC=CC=C6C=C2C7=C(C(C)C)C=C(C(C)C)C=C7C(C)C	2.01504	0.283503	0.957275	0.0843007	0.484828	0.0308566	0.116958	0	21.6508
194	Org.Lett.2009, 11,4620.	27	CH2CL2	S05aa	Nuf01	Faa17	P05aaNuf01	1	5	0	12	ClCCl	O=C(CC(C1=CC=CC=C1)C2=CNC3=C2C=CC=C3)C4=CC=CC=C4	OC(C1=CC=CC=C1)C2=CNC3=C2C=CC=C3	Enamide 1a	C=C(C1=CC=CC=C1)NC(C)=O	XXXIV-R	FC1=CC(C2=CC3=CC=CC=C3[C@]([C@]4=C(C=CC=C5)C5=CC(C6=CC(F)=CC(F)=C6)=C4O7)=C2OP7(O)=O)=CC(F)=C1	2.57047	0.361916	1.47785	0.0969992	0.278235	0.0138347	0.0522023	0	21.9791
195	Org. Lett. 2013, 15, 2688.	-27	CH2CL2	S06aa	Nuc02	Fba09	P06aaNuc01	-1	5	25	6	ClCCl	O=C1C2=C(C=CC=C2)C(N1CC3)([H])C4=C3C5=C(N4)C=CC=C5	O=C1C2=C(C=CC=C2)C(N1CC3)(O)C4=C3C5=C(N4)C=CC=C5	Diethyl 1,4-dihydro-2,6-dimethyl-3,5-pyridinedicarboxylate	O=C(C1=C(C)NC(C)=C(C(OCC)=O)C1)OCC	IX-S	O=P1(O)OC2=[C@]([C@]3=C(C=CC=C4)C4=CC(C5=CC=CC6=C5C=CC=C6)=C3O1)C7=CC=CC=C7C=C2C8=CC=CC9=C8C=CC=C9	3.31315	0.344834	1.5884	0.102944	0.484828	0.0308566	0.116958	0	21.6508
196	J. Org. Chem. 2012, 77, 2986	26	Dioxane	S01aa	Nua01	Faa10	P01aaNua01	1	2.5	25	24	C1COCCO1	O=C1C2=CC=CC=C2C3(C4=CNC5=C4C=CC=C5)N1CCC6=CC(OC)=C(OC)C=C63	O=C1C2=CC=CC=C2C3(O)N1CCC4=CC(OC)=C(OC)C=C43	Indole	C1(C=CN2)=C2C=CC=C1	IV-R	O=P1(O)OC([C@@]([C@@]2=C(C(C)C)C=C(C(C)C)C=C2C(C)C)=C3)=[C@@]([C@@]4=C(C=CC=C5)C5=CC(C6=C(C(C)C)C=C(C(C)C)C=C6C(C)C)=C4O1)C7=C3C=CC=C7	2.01504	0.283503	0.957275	0.0843007	0.146649	0.0314631	0.106625	0	21.0388
197	J. Org. Chem. 2012, 77, 2986	26	EtOH	S01aa	Nua01	Faa10	P01aaNua01	1	2.5	25	7	CCO	O=C1C2=CC=CC=C2C3(C4=CNC5=C4C=CC=C5)N1CCC6=CC(OC)=C(OC)C=C63	O=C1C2=CC=CC=C2C3(O)N1CCC4=CC(OC)=C(OC)C=C43	Indole	C1(C=CN2)=C2C=CC=C1	IV-R	O=P1(O)OC([C@@]([C@@]2=C(C(C)C)C=C(C(C)C)C=C2C(C)C)=C3)=[C@@]([C@@]4=C(C=CC=C5)C5=CC(C6=C(C(C)C)C=C(C(C)C)C=C6C(C)C)=C4O1)C7=C3C=CC=C7	2.01504	0.283503	0.957275	0.0843007	0.146649	0.0314631	0.106625	0	21.0388
198	J. Org. Chem. 2012, 77, 2986	26	TBME	S01aa	Nua01	Faa10	P01aaNua01	1	10	-78	0.5	COC(C)(C)C	O=C1C2=CC=CC=C2C3(C4=CNC5=C4C=CC=C5)N1CCC6=CC(OC)=C(OC)C=C63	O=C1C2=CC=CC=C2C3(O)N1CCC4=CC(OC)=C(OC)C=C43	Indole	C1(C=CN2)=C2C=CC=C1	IV-R	O=P1(O)OC([C@@]([C@@]2=C(C(C)C)C=C(C(C)C)C=C2C(C)C)=C3)=[C@@]([C@@]4=C(C=CC=C5)C5=CC(C6=C(C(C)C)C=C(C(C)C)C=C6C(C)C)=C4O1)C7=C3C=CC=C7	2.01504	0.283503	0.957275	0.0843007	0.146649	0.0314631	0.106625	0	21.0388
199	J. Org. Chem. 2012, 77, 2986	26	TBME	S01aa	Nua01	Faa10	P01aaNua01	1	20	-78	0.5	COC(C)(C)C	O=C1C2=CC=CC=C2C3(C4=CNC5=C4C=CC=C5)N1CCC6=CC(OC)=C(OC)C=C63	O=C1C2=CC=CC=C2C3(O)N1CCC4=CC(OC)=C(OC)C=C43	Indole	C1(C=CN2)=C2C=CC=C1	IV-R	O=P1(O)OC([C@@]([C@@]2=C(C(C)C)C=C(C(C)C)C=C2C(C)C)=C3)=[C@@]([C@@]4=C(C=CC=C5)C5=CC(C6=C(C(C)C)C=C(C(C)C)C=C6C(C)C)=C4O1)C7=C3C=CC=C7	2.01504	0.283503	0.957275	0.0843007	0.146649	0.0314631	0.106625	0	21.0388
200	Eur. J. Org. Chem. 2011, 3060	24	CHCl3	S03ca	Nua01	Fab04	P03caNua01	1	5	20	0.5	ClC(Cl)Cl	O=C1C2=CC=CC=C2[C@@](C3=CNC4=C3C=CC=C4)(CC)N1	OC1(CC)NC(C2=CC=CC=C21)=O	Indole	C12=CC=CC=C1C=CN2	XXI-R	O=P1(O)OC(C(C2=CC=C(C=CC=C3)C3=C2)=C4)=[C@@]([C@@]5=C(CCCC6)C6=CC(C7=CC=C(C=CC=C8)C8=C7)=C5O1)C9=C4CCCC9	2.52678	0.344834	1.21556	0.102944	0.146649	0.0304457	0.151994	0	21.5097
201	E. Aranzamendi, PhD Thesis, UPV/EHU	24	THF	S01aa	Nub01	Faa10	P01aaNub01	1	20	25	15	C1CCCO1	O=C1C2=CC=CC=C2C3(C4=CNC=C4)N1CCC5=CC(OC)=C(OC)C=C53	O=C1C2=CC=CC=C2C3(O)N1CCC4=CC(OC)=C(OC)C=C43	pyrrole	C1=CNC=C1	IV-R	O=P1(O)OC([C@@]([C@@]2=C(C(C)C)C=C(C(C)C)C=C2C(C)C)=C3)=[C@@]([C@@]4=C(C=CC=C5)C5=CC(C6=C(C(C)C)C=C(C(C)C)C=C6C(C)C)=C4O1)C7=C3C=CC=C7	2.01504	0.283503	0.957275	0.0843007	0.275565	0.0370878	0.123294	0	21.0388
202	ChemOpen, 2016, 5, 540	22	THF	S01aa	Nuf01	Faa12	P01aaNuf01	1	20	25	48	C1CCCO1	O=C1C2=CC=CC=C2C3(N1CCC4=CC(OC)=C(OC)C=C43)CC(C5=CC=CC=C5)=O	O=C1C2=CC=CC=C2C3(O)N1CCC4=CC(OC)=C(OC)C=C43	enamide	C=C(NC(C)=O)C1=CC=CC=C1	V-R	O=P1(O)OC(C(C2=CC(C(F)(F)F)=CC(C(F)(F)F)=C2)=C3)=C(C4=C(C=CC=C5)C5=CC(C6=CC(C(F)(F)F)=CC(C(F)(F)F)=C6)=C4O1)C7=C3C=CC=C7	1.82972	0.267093	1.21505	0.0633052	0.278235	0.0275155	0.130222	0	21.0388
203	E. Aranzamendi, PhD Thesis, UPV/EHU	22	THF	S01aa	Nub01	Faa10	P01aaNub01	1	20	-10	24	C1CCCO1	O=C1C2=CC=CC=C2C3(C4=CNC=C4)N1CCC5=CC(OC)=C(OC)C=C53	O=C1C2=CC=CC=C2C3(O)N1CCC4=CC(OC)=C(OC)C=C43	pyrrole	C1=CNC=C1	IV-R	O=P1(O)OC([C@@]([C@@]2=C(C(C)C)C=C(C(C)C)C=C2C(C)C)=C3)=[C@@]([C@@]4=C(C=CC=C5)C5=CC(C6=C(C(C)C)C=C(C(C)C)C=C6C(C)C)=C4O1)C7=C3C=CC=C7	2.01504	0.283503	0.957275	0.0843007	0.275565	0.0370878	0.123294	0	21.0388
204	E. Aranzamendi, PhD Thesis, UPV/EHU	22	THF	S01aa	Nub01	Faa10	P01aaNub01	1	2.5	25	48	C1CCCO1	O=C1C2=CC=CC=C2C3(C4=CNC=C4)N1CCC5=CC(OC)=C(OC)C=C53	O=C1C2=CC=CC=C2C3(O)N1CCC4=CC(OC)=C(OC)C=C43	pyrrole	C1=CNC=C1	IV-R	O=P1(O)OC([C@@]([C@@]2=C(C(C)C)C=C(C(C)C)C=C2C(C)C)=C3)=[C@@]([C@@]4=C(C=CC=C5)C5=CC(C6=C(C(C)C)C=C(C(C)C)C=C6C(C)C)=C4O1)C7=C3C=CC=C7	2.01504	0.283503	0.957275	0.0843007	0.275565	0.0370878	0.123294	0	21.0388
205	Org. Lett. 2013, 15, 2688.	-22	CHCl3	S06aa	Nuc02	Fba11	P06aaNuc01	-1	5	25	8	ClC(Cl)Cl	O=C1C2=C(C=CC=C2)C(N1CC3)([H])C4=C3C5=C(N4)C=CC=C5	O=C1C2=C(C=CC=C2)C(N1CC3)(O)C4=C3C5=C(N4)C=CC=C5	Diethyl 1,4-dihydro-2,6-dimethyl-3,5-pyridinedicarboxylate	O=C(C1=C(C)NC(C)=C(C(OCC)=O)C1)OCC	II-S	O=P1(O)OC2=[C@]([C@]3=C(C=CC=C4)C4=CC([Si](C5=CC=CC=C5)(C6=CC=CC=C6)C7=CC=CC=C7)=C3O1)C8=CC=CC=C8C=C2[Si](C9=CC=CC=C9)(C%10=CC=CC=C%10)C%11=CC=CC=C%11	3.25742	0.268405	1.38001	0.0908892	0.484828	0.0308566	0.116958	0	21.6508
206	J. Org. Chem. 2012, 77, 2986	21	THF	S01aa	Nua01	Faa04	P01aaNua01	1	20	25	24	C1CCCO1	O=C1C2=CC=CC=C2C3(C4=CNC5=C4C=CC=C5)N1CCC6=CC(OC)=C(OC)C=C63	O=C1C2=CC=CC=C2C3(O)N1CCC4=CC(OC)=C(OC)C=C43	Indole	C1(C=CN2)=C2C=CC=C1	III-R	O=P1(O)OC(C(C2=CC(C=CC=C3)=C3C4=C2C=CC=C4)=C5)=[C@@]([C@@]6=C(C=CC=C7)C7=CC(C8=C(C=CC=C9)C9=C(C=CC=C%10)C%10=C8)=C6O1)C%11=C5C=CC=C%11	3.41261	0.29396	1.61486	0.0874688	0.146649	0.0314631	0.106625	0	21.0388
207	E. Aranzamendi, PhD Thesis, UPV/EHU	21	THF	S01aa	Nub01	Faa10	P01aaNub01	1	20	25	24	C1CCCO1	O=C1C2=CC=CC=C2C3(C4=CNC=C4)N1CCC5=CC(OC)=C(OC)C=C53	O=C1C2=CC=CC=C2C3(O)N1CCC4=CC(OC)=C(OC)C=C43	pyrrole	C1=CNC=C1	IV-R	O=P1(O)OC([C@@]([C@@]2=C(C(C)C)C=C(C(C)C)C=C2C(C)C)=C3)=[C@@]([C@@]4=C(C=CC=C5)C5=CC(C6=C(C(C)C)C=C(C(C)C)C=C6C(C)C)=C4O1)C7=C3C=CC=C7	2.01504	0.283503	0.957275	0.0843007	0.275565	0.0370878	0.123294	0	21.0388
208	J. Org. Chem. 2012, 77, 2986	20	TBME	S01aa	Nua04	Faa01	P01aaNua04	1	20	25	0.5	COC(C)(C)C	O=C1C2=CC=CC=C2C3(C4=CNC5=C4C=C(Br)C=C5)N1CCC6=CC(OC)=C(OC)C=C63	O=C1C2=CC=CC=C2C3(O)N1CCC4=CC(OC)=C(OC)C=C43	5-bromoindole	BrC(C=C1)=CC2=C1NC=C2	I-R	[H]C1=CC2=C([C@]([C@]3=C(C=CC=C4)C4=CC([H])=C3O5)=C1OP5(O)=O)C=CC=C2	2.80027	0.607811	1.44251	0.184585	0.254958	0.0296664	0.0978188	0	21.0388
209	Eur. J. Org. Chem. 2011, 892	19	CHCl3	S03aa	Nua01	Fab04	P03aaNua01	1	5	20	144	ClC(Cl)Cl	O=C1C2=C(C=CC=C2)[C@H](C3=CNC4=C3C=CC=C4)N1	OC1NC(C2=CC=CC=C21)=O	Indole	C12=CC=CC=C1C=CN2	XXI-R	O=P1(O)OC(C(C2=CC=C(C=CC=C3)C3=C2)=C4)=[C@@]([C@@]5=C(CCCC6)C6=CC(C7=CC=C(C=CC=C8)C8=C7)=C5O1)C9=C4CCCC9	2.52678	0.344834	1.21556	0.102944	0.146649	0.0342038	0.0244598	0	21.273
210	Org. Lett. 2013, 15, 2688.	-18	CH2CL2	S06aa	Nuc02	Fae01	P06aaNuc01	-1	5	25	5	ClCCl	O=C1C2=C(C=CC=C2)C(N1CC3)([H])C4=C3C5=C(N4)C=CC=C5	O=C1C2=C(C=CC=C2)C(N1CC3)(O)C4=C3C5=C(N4)C=CC=C5	Diethyl 1,4-dihydro-2,6-dimethyl-3,5-pyridinedicarboxylate	O=C(C1=C(C)NC(C)=C(C(OCC)=O)C1)OCC	XXXII-S	O=P1(O)OC2=[C@]([C@]3=C(C4=CC=CC=C4)C=C(C=CC5=C6C=CC=C5)C6=C3O1)C(C7=CC=CC=C7)=CC8=C2C(C=CC=C9)=C9C=C8	3.31416	0.344834	1.58861	0.102944	0.484828	0.0308566	0.116958	0	21.6508
211	Org.Lett.2009, 11,4620.	16	CH2CL2	S05aa	Nuf01	Faa02	P05aaNuf01	1	5	0	12	ClCCl	O=C(CC(C1=CC=CC=C1)C2=CNC3=C2C=CC=C3)C4=CC=CC=C4	OC(C1=CC=CC=C1)C2=CNC3=C2C=CC=C3	Enamide 1a	C=C(C1=CC=CC=C1)NC(C)=O	VII-R	O=P1(O)OC([C@@]([C@@]2=C(C=CC=C3)C3=CC4=C2C=CC=C4)=C5)=[C@@]([C@@]6=C(C=CC=C7)C7=CC(C8=C(C=CC=C9)C9=CC%10=C8C=CC=C%10)=C6O1)C%11=C5C=CC=C%11	3.41261	0.29396	1.61486	0.0874688	0.278235	0.0138347	0.0522023	0	21.9791
212	J. Org. Chem. 2012, 77, 2986	15	TBME	S01aa	Nua01	Faa04	P01aaNua01	1	20	-78	0.5	COC(C)(C)C	O=C1C2=CC=CC=C2C3(C4=CNC5=C4C=CC=C5)N1CCC6=CC(OC)=C(OC)C=C63	O=C1C2=CC=CC=C2C3(O)N1CCC4=CC(OC)=C(OC)C=C43	Indole	C1(C=CN2)=C2C=CC=C1	III-R	O=P1(O)OC(C(C2=CC(C=CC=C3)=C3C4=C2C=CC=C4)=C5)=[C@@]([C@@]6=C(C=CC=C7)C7=CC(C8=C(C=CC=C9)C9=C(C=CC=C%10)C%10=C8)=C6O1)C%11=C5C=CC=C%11	3.41261	0.29396	1.61486	0.0874688	0.146649	0.0314631	0.106625	0	21.0388
213	Org.Lett.2009, 11,4620.	14	CH2CL2	S05aa	Nuf01	Faj01	P05aaNuf01	1	5	0	4	ClCCl	O=C(CC(C1=CC=CC=C1)C2=CNC3=C2C=CC=C3)C4=CC=CC=C4	OC(C1=CC=CC=C1)C2=CNC3=C2C=CC=C3	Enamide 1a	C=C(C1=CC=CC=C1)NC(C)=O	XXXVII-R	O=P1(O)OC(C(COCC2=C(OP3(O)=O)C(C4=C(O3)C=CC5=C4C=CC=C5)=C(C=CC=C6)C6=C2)=C7)=[C@@]([C@@]8=C(C=CC=C9)C9=CC=C8O1)C%10=C7C=CC=C%10	2.58976	0.60565	1.35208	0.185824	0.278235	0.0138347	0.0522023	0	21.9791
214	J. Org. Chem. 2012, 77, 2986	12	TBME	S01aa	Nua01	Faa01	P01aaNua01	1	20	-78	0.5	COC(C)(C)C	O=C1C2=CC=CC=C2C3(C4=CNC5=C4C=CC=C5)N1CCC6=CC(OC)=C(OC)C=C63	O=C1C2=CC=CC=C2C3(O)N1CCC4=CC(OC)=C(OC)C=C43	Indole	C1(C=CN2)=C2C=CC=C1	I-R	[H]C1=CC2=C([C@]([C@]3=C(C=CC=C4)C4=CC([H])=C3O5)=C1OP5(O)=O)C=CC=C2	2.80027	0.607811	1.44251	0.184585	0.146649	0.0314631	0.106625	0	21.0388
215	E. Aranzamendi, PhD Thesis, UPV/EHU	12	THF	S01aa	Nub01	Faa10	P01aaNub01	1	20	-30	24	C1CCCO1	O=C1C2=CC=CC=C2C3(C4=CNC=C4)N1CCC5=CC(OC)=C(OC)C=C53	O=C1C2=CC=CC=C2C3(O)N1CCC4=CC(OC)=C(OC)C=C43	pyrrole	C1=CNC=C1	IV-R	O=P1(O)OC([C@@]([C@@]2=C(C(C)C)C=C(C(C)C)C=C2C(C)C)=C3)=[C@@]([C@@]4=C(C=CC=C5)C5=CC(C6=C(C(C)C)C=C(C(C)C)C=C6C(C)C)=C4O1)C7=C3C=CC=C7	2.01504	0.283503	0.957275	0.0843007	0.275565	0.0370878	0.123294	0	21.0388
216	E. Aranzamendi, PhD Thesis, UPV/EHU	11	THF	S01ca	Nua01	Faa10	P01caNua01	1	20	25	120	C1CCCO1	O=C1C2=CC=CC=C2C3(C4=CN([H])C5=C4C=CC=C5)N1CCC6=CC(OC)=C(OC)C(OC)=C63	O=C1C2=CC=CC=C2C3(O)N1CCC4=CC(OC)=C(OC)C(OC)=C43	Indole	C1(C=CN2)=C2C=CC=C1	IV-R	O=P1(O)OC([C@@]([C@@]2=C(C(C)C)C=C(C(C)C)C=C2C(C)C)=C3)=[C@@]([C@@]4=C(C=CC=C5)C5=CC(C6=C(C(C)C)C=C(C(C)C)C=C6C(C)C)=C4O1)C7=C3C=CC=C7	2.01504	0.283503	0.957275	0.0843007	0.146649	0.0349842	0.114301	0	20.7628
217	E. Aranzamendi, PhD Thesis, UPV/EHU	11	THF	S01ca	Nua01	Faa10	P01caNua01	1	20	25	120	C1CCCO1	O=C1C2=CC=CC=C2C3(C4=CN([H])C5=C4C=CC=C5)N1CCC6=CC(OC)=C(OC)C(OC)=C63	O=C1C2=CC=CC=C2C3(O)N1CCC4=CC(OC)=C(OC)C(OC)=C43	Indole	C1(C=CN2)=C2C=CC=C1	IV-R	O=P1(O)OC(C(C2=C(C(C)C)C=C(C(C)C)C=C2C(C)C)=C3)=C(C4=C(C=CC=C5)C5=CC(C6=C(C(C)C)C=C(C(C)C)C=C6C(C)C)=C4O1)C7=C3C=CC=C7	2.01504	0.283503	0.957275	0.0843007	0.146649	0.0349842	0.114301	0	20.7628
218	J. Org. Chem. 2012, 77, 2986	10	TBME	S01aa	Nua04	Faa01	P01aaNua04	1	20	-78	4	COC(C)(C)C	O=C1C2=CC=CC=C2C3(C4=CNC5=C4C=C(Br)C=C5)N1CCC6=CC(OC)=C(OC)C=C63	O=C1C2=CC=CC=C2C3(O)N1CCC4=CC(OC)=C(OC)C=C43	5-bromoindole	BrC(C=C1)=CC2=C1NC=C2	I-R	[H]C1=CC2=C([C@]([C@]3=C(C=CC=C4)C4=CC([H])=C3O5)=C1OP5(O)=O)C=CC=C2	2.80027	0.607811	1.44251	0.184585	0.254958	0.0296664	0.0978188	0	21.0388
219	J. Org. Chem. 2012, 77, 2986	10	TBME	S01aa	Nua04	Faa10	P01aaNua04	1	20	25	0.5	COC(C)(C)C	O=C1C2=CC=CC=C2C3(C4=CNC5=C4C=C(Br)C=C5)N1CCC6=CC(OC)=C(OC)C=C63	O=C1C2=CC=CC=C2C3(O)N1CCC4=CC(OC)=C(OC)C=C43	5-bromoindole	BrC(C=C1)=CC2=C1NC=C2	IV-R	O=P1(O)OC([C@@]([C@@]2=C(C(C)C)C=C(C(C)C)C=C2C(C)C)=C3)=[C@@]([C@@]4=C(C=CC=C5)C5=CC(C6=C(C(C)C)C=C(C(C)C)C=C6C(C)C)=C4O1)C7=C3C=CC=C7	2.01504	0.283503	0.957275	0.0843007	0.254958	0.0296664	0.0978188	0	21.0388
220	J. Org. Chem. 2012, 77, 2986	10	TBME	S01aa	Nua03	Faa10	P01aaNua03	1	20	-30	0.5	COC(C)(C)C	O=C1C2=CC=CC=C2C3(C4=CNC5=C4C=C(OC)C=C5)N1CCC6=CC(OC)=C(OC)C=C63	O=C1C2=CC=CC=C2C3(O)N1CCC4=CC(OC)=C(OC)C=C43	5-methoxiindole	COC1=CC(C=CN2)=C2C=C1	IV-R	O=P1(O)OC([C@@]([C@@]2=C(C(C)C)C=C(C(C)C)C=C2C(C)C)=C3)=[C@@]([C@@]4=C(C=CC=C5)C5=CC(C6=C(C(C)C)C=C(C(C)C)C=C6C(C)C)=C4O1)C7=C3C=CC=C7	2.01504	0.283503	0.957275	0.0843007	0.296117	0.0347561	0.114301	0	21.0388
221	J. Org. Chem. 2012, 77, 2986	10	THF	S01aa	Nua01	Faa12	P01aaNua01	1	20	25	24	C1CCCO1	O=C1C2=CC=CC=C2C3(C4=CNC5=C4C=CC=C5)N1CCC6=CC(OC)=C(OC)C=C63	O=C1C2=CC=CC=C2C3(O)N1CCC4=CC(OC)=C(OC)C=C43	Indole	C1(C=CN2)=C2C=CC=C1	V-R	O=P1(O)OC(C(C2=CC(C(F)(F)F)=CC(C(F)(F)F)=C2)=C3)=[C@@]([C@@]4=C(C=CC=C5)C5=CC(C6=CC(C(F)(F)F)=CC(C(F)(F)F)=C6)=C4O1)C7=C3C=CC=C7	1.82972	0.267093	1.21505	0.0633052	0.146649	0.0314631	0.106625	0	21.0388
222	Eur. J. Org. Chem. 2011, 3060	-10	Acetonitrile	S03ca	Nua01	Fba11	P03caNua01	-1	5	20	52	N#CC	O=C1C2=CC=CC=C2[C@@](C3=CNC4=C3C=CC=C4)(CC)N1	OC1(CC)NC(C2=CC=CC=C21)=O	Indole	C12=CC=CC=C1C=CN2	II-S	O=P1(O)OC(C([Si](C2=CC=CC=C2)(C3=CC=CC=C3)C4=CC=CC=C4)=C5)=[C@]([C@]6=C(C=CC=C7)C7=CC([Si](C8=CC=CC=C8)(C9=CC=CC=C9)C%10=CC=CC=C%10)=C6O1)C%11=C5C=CC=C%11	3.25742	0.268405	1.38001	0.0908892	0.146649	0.0304457	0.151994	0.615385	21.5097
223	Org. Lett. 2013, 15, 2688.	-8	CH2CL2	S06aa	Nuc02	Fba12	P06aaNuc01	-1	5	25	5	ClCCl	O=C1C2=C(C=CC=C2)C(N1CC3)([H])C4=C3C5=C(N4)C=CC=C5	O=C1C2=C(C=CC=C2)C(N1CC3)(O)C4=C3C5=C(N4)C=CC=C5	Diethyl 1,4-dihydro-2,6-dimethyl-3,5-pyridinedicarboxylate	O=C(C1=C(C)NC(C)=C(C(OCC)=O)C1)OCC	V-S	O=P1(O)OC2=[C@]([C@]3=C(C=CC=C4)C4=CC(C5=CC(C(F)(F)F)=CC(C(F)(F)F)=C5)=C3O1)C6=CC=CC=C6C=C2C7=CC(C(F)(F)F)=CC(C(F)(F)F)=C7	1.82972	0.267093	1.21505	0.0633052	0.484828	0.0308566	0.116958	0	21.6508
224	E. Aranzamendi, PhD Thesis, UPV/EHU	6	TBME	S01aa	Nub01	Faa01	P01aaNub01	1	20	-78	4	COC(C)(C)C	O=C1C2=CC=CC=C2C3(C4=CNC=C4)N1CCC5=CC(OC)=C(OC)C=C53	O=C1C2=CC=CC=C2C3(O)N1CCC4=CC(OC)=C(OC)C=C43	pyrrole	C1=CNC=C1	I-R	[H]C1=CC2=C([C@]([C@]3=C(C=CC=C4)C4=CC([H])=C3O5)=C1OP5(O)=O)C=CC=C2	2.80027	0.607811	1.44251	0.184585	0.275565	0.0370878	0.123294	0	21.0388
225	J. Org. Chem. 2012, 77, 2986	6	TBME	S01aa	Nua08	Faa01	P01aaNua08	1	20	-78	4	COC(C)(C)C	O=C1C2=CC=CC=C2C3(C4=CNC5=C4C=C([N+]([O-])=O)C=C5)N1CCC6=CC(OC)=C(OC)C=C63	O=C1C2=CC=CC=C2C3(O)N1CCC4=CC(OC)=C(OC)C=C43	5-nitroindole	O=[N+](C(C=C1)=CC2=C1NC=C2)[O-]	I-R	[H]C1=CC2=C([C@]([C@]3=C(C=CC=C4)C4=CC([H])=C3O5)=C1OP5(O)=O)C=CC=C2	2.80027	0.607811	1.44251	0.184585	0.96242	0.0643281	0.0987131	0	21.0388
226	J. Org. Chem. 2012, 77, 2986	6	TBME	S01aa	Nua01	Faa11	P01aaNua01	1	20	-78	0.5	COC(C)(C)C	O=C1C2=CC=CC=C2C3(C4=CNC5=C4C=CC=C5)N1CCC6=CC(OC)=C(OC)C=C63	O=C1C2=CC=CC=C2C3(O)N1CCC4=CC(OC)=C(OC)C=C43	Indole	C1(C=CN2)=C2C=CC=C1	II-R	O=P1(O)OC(C([Si](C2=CC=CC=C2)(C3=CC=CC=C3)C4=CC=CC=C4)=C5)=[C@@]([C@@]6=C(C=CC=C7)C7=CC([Si](C8=CC=CC=C8)(C9=CC=CC=C9)C%10=CC=CC=C%10)=C6O1)C%11=C5C=CC=C%11	3.25742	0.268405	1.38001	0.0908892	0.146649	0.0314631	0.106625	0	21.0388
227	E. Aranzamendi, PhD Thesis, UPV/EHU	6	TBME	S01aa	Nub01	Faa01	P01aaNub01	1	20	25	0.5	COC(C)(C)C	O=C1C2=CC=CC=C2C3(C4=CNC=C4)N1CCC5=CC(OC)=C(OC)C=C53	O=C1C2=CC=CC=C2C3(O)N1CCC4=CC(OC)=C(OC)C=C43	pyrrole	C1=CNC=C1	I-R	[H]C1=CC2=C([C@]([C@]3=C(C=CC=C4)C4=CC([H])=C3O5)=C1OP5(O)=O)C=CC=C2	2.80027	0.607811	1.44251	0.184585	0.275565	0.0370878	0.123294	0	21.0388
228	Org. Lett. 2013, 15, 2688.	-6	TBME	S06aa	Nuc02	Fba11	P06aaNuc01	-1	5	25	48	COC(C)(C)C	O=C1C2=C(C=CC=C2)C(N1CC3)([H])C4=C3C5=C(N4)C=CC=C5	O=C1C2=C(C=CC=C2)C(N1CC3)(O)C4=C3C5=C(N4)C=CC=C5	Diethyl 1,4-dihydro-2,6-dimethyl-3,5-pyridinedicarboxylate	O=C(C1=C(C)NC(C)=C(C(OCC)=O)C1)OCC	II-S	O=P1(O)OC2=[C@]([C@]3=C(C=CC=C4)C4=CC([Si](C5=CC=CC=C5)(C6=CC=CC=C6)C7=CC=CC=C7)=C3O1)C8=CC=CC=C8C=C2[Si](C9=CC=CC=C9)(C%10=CC=CC=C%10)C%11=CC=CC=C%11	3.25742	0.268405	1.38001	0.0908892	0.484828	0.0308566	0.116958	0	21.6508
229	J. Org. Chem. 2012, 77, 2986	4	CH2CL2	S01aa	Nua01	Faa10	P01aaNua01	1	20	-78	0.5	ClCCl	O=C1C2=CC=CC=C2C3(C4=CNC5=C4C=CC=C5)N1CCC6=CC(OC)=C(OC)C=C63	O=C1C2=CC=CC=C2C3(O)N1CCC4=CC(OC)=C(OC)C=C43	Indole	C1(C=CN2)=C2C=CC=C1	IV-R	O=P1(O)OC([C@@]([C@@]2=C(C(C)C)C=C(C(C)C)C=C2C(C)C)=C3)=[C@@]([C@@]4=C(C=CC=C5)C5=CC(C6=C(C(C)C)C=C(C(C)C)C=C6C(C)C)=C4O1)C7=C3C=CC=C7	2.01504	0.283503	0.957275	0.0843007	0.146649	0.0314631	0.106625	0	21.0388
230	J. Org. Chem. 2012, 77, 2986	4	TBME	S01aa	Nua03	Faa01	P01aaNua03	1	20	-30	0.5	COC(C)(C)C	O=C1C2=CC=CC=C2C3(C4=CNC5=C4C=C(OC)C=C5)N1CCC6=CC(OC)=C(OC)C=C63	O=C1C2=CC=CC=C2C3(O)N1CCC4=CC(OC)=C(OC)C=C43	5-methoxiindole	COC1=CC(C=CN2)=C2C=C1	I-R	[H]C1=CC2=C([C@]([C@]3=C(C=CC=C4)C4=CC([H])=C3O5)=C1OP5(O)=O)C=CC=C2	2.80027	0.607811	1.44251	0.184585	0.296117	0.0347561	0.114301	0	21.0388
231	E. Aranzamendi, PhD Thesis, UPV/EHU	3	THF	S01ba	Nua01	Faa10	P01baNua01	1	20	25	24	C1CCCO1	O=C1C2=CC=CC=C2C3(C4=CN([H])C5=C4C=CC=C5)N1CCC6=CC(OC)=CC(OC)=C63	O=C1C2=CC=CC=C2C3(O)N1CCC4=CC(OC)=CC(OC)=C43	Indole	C1(C=CN2)=C2C=CC=C1	IV-R	O=P1(O)OC([C@@]([C@@]2=C(C(C)C)C=C(C(C)C)C=C2C(C)C)=C3)=[C@@]([C@@]4=C(C=CC=C5)C5=CC(C6=C(C(C)C)C=C(C(C)C)C=C6C(C)C)=C4O1)C7=C3C=CC=C7	2.01504	0.283503	0.957275	0.0843007	0.146649	0.0312234	0.106625	0	21.0429
232	E. Aranzamendi, PhD Thesis, UPV/EHU	3	THF	S01ba	Nua01	Faa10	P01baNua01	1	20	25	24	C1CCCO1	O=C1C2=CC=CC=C2C3(C4=CN([H])C5=C4C=CC=C5)N1CCC6=CC(OC)=CC(OC)=C63	O=C1C2=CC=CC=C2C3(O)N1CCC4=CC(OC)=CC(OC)=C43	Indole	C1(C=CN2)=C2C=CC=C1	IV-R	O=P1(O)OC(C(C2=C(C(C)C)C=C(C(C)C)C=C2C(C)C)=C3)=C(C4=C(C=CC=C5)C5=CC(C6=C(C(C)C)C=C(C(C)C)C=C6C(C)C)=C4O1)C7=C3C=CC=C7	2.01504	0.283503	0.957275	0.0843007	0.146649	0.0312234	0.106625	0	21.0429
233	J. Org. Chem. 2012, 77, 2986	2	Acetonitrile	S01aa	Nua01	Faa11	P01aaNua01	1	20	25	3	N#CC	O=C1C2=CC=CC=C2C3(C4=CNC5=C4C=CC=C5)N1CCC6=CC(OC)=C(OC)C=C63	O=C1C2=CC=CC=C2C3(O)N1CCC4=CC(OC)=C(OC)C=C43	Indole	C1(C=CN2)=C2C=CC=C1	II-R	O=P1(O)OC(C([Si](C2=CC=CC=C2)(C3=CC=CC=C3)C4=CC=CC=C4)=C5)=[C@@]([C@@]6=C(C=CC=C7)C7=CC([Si](C8=CC=CC=C8)(C9=CC=CC=C9)C%10=CC=CC=C%10)=C6O1)C%11=C5C=CC=C%11	3.25742	0.268405	1.38001	0.0908892	0.146649	0.0314631	0.106625	0.615385	21.0388
234	J. Org. Chem. 2012, 77, 2986	2	TBME	S01aa	Nua04	Faa01	P01aaNua04	1	20	-30	0.5	COC(C)(C)C	O=C1C2=CC=CC=C2C3(C4=CNC5=C4C=C(Br)C=C5)N1CCC6=CC(OC)=C(OC)C=C63	O=C1C2=CC=CC=C2C3(O)N1CCC4=CC(OC)=C(OC)C=C43	5-bromoindole	BrC(C=C1)=CC2=C1NC=C2	I-R	[H]C1=CC2=C([C@]([C@]3=C(C=CC=C4)C4=CC([H])=C3O5)=C1OP5(O)=O)C=CC=C2	2.80027	0.607811	1.44251	0.184585	0.254958	0.0296664	0.0978188	0	21.0388
235	J. Org. Chem. 2012, 77, 2986	2	TBME	S01aa	Nua03	Faa01	P01aaNua03	1	20	-78	4	COC(C)(C)C	O=C1C2=CC=CC=C2C3(C4=CNC5=C4C=C(OC)C=C5)N1CCC6=CC(OC)=C(OC)C=C63	O=C1C2=CC=CC=C2C3(O)N1CCC4=CC(OC)=C(OC)C=C43	5-methoxiindole	COC1=CC(C=CN2)=C2C=C1	I-R	[H]C1=CC2=C([C@]([C@]3=C(C=CC=C4)C4=CC([H])=C3O5)=C1OP5(O)=O)C=CC=C2	2.80027	0.607811	1.44251	0.184585	0.296117	0.0347561	0.114301	0	21.0388
236	J. Org. Chem. 2012, 77, 2986	2	TBME	S01aa	Nua04	Faa10	P01aaNua04	1	20	-78	0.5	COC(C)(C)C	O=C1C2=CC=CC=C2C3(C4=CNC5=C4C=C(Br)C=C5)N1CCC6=CC(OC)=C(OC)C=C63	O=C1C2=CC=CC=C2C3(O)N1CCC4=CC(OC)=C(OC)C=C43	5-bromoindole	BrC(C=C1)=CC2=C1NC=C2	IV-R	O=P1(O)OC([C@@]([C@@]2=C(C(C)C)C=C(C(C)C)C=C2C(C)C)=C3)=[C@@]([C@@]4=C(C=CC=C5)C5=CC(C6=C(C(C)C)C=C(C(C)C)C=C6C(C)C)=C4O1)C7=C3C=CC=C7	2.01504	0.283503	0.957275	0.0843007	0.254958	0.0296664	0.0978188	0	21.0388
237	J. Org. Chem. 2012, 77, 2986	2	TBME	S01aa	Nua03	Faa01	P01aaNua03	1	20	25	0.5	COC(C)(C)C	O=C1C2=CC=CC=C2C3(C4=CNC5=C4C=C(OC)C=C5)N1CCC6=CC(OC)=C(OC)C=C63	O=C1C2=CC=CC=C2C3(O)N1CCC4=CC(OC)=C(OC)C=C43	5-methoxiindole	COC1=CC(C=CN2)=C2C=C1	I-R	[H]C1=CC2=C([C@]([C@]3=C(C=CC=C4)C4=CC([H])=C3O5)=C1OP5(O)=O)C=CC=C2	2.80027	0.607811	1.44251	0.184585	0.296117	0.0347561	0.114301	0	21.0388
238	J. Org. Chem. 2012, 77, 2986	2	TBME	S01aa	Nua01	Faa12	P01aaNua01	1	20	-78	0.5	COC(C)(C)C	O=C1C2=CC=CC=C2C3(C4=CNC5=C4C=CC=C5)N1CCC6=CC(OC)=C(OC)C=C63	O=C1C2=CC=CC=C2C3(O)N1CCC4=CC(OC)=C(OC)C=C43	Indole	C1(C=CN2)=C2C=CC=C1	V-R	O=P1(O)OC(C(C2=CC(C(F)(F)F)=CC(C(F)(F)F)=C2)=C3)=[C@@]([C@@]4=C(C=CC=C5)C5=CC(C6=CC(C(F)(F)F)=CC(C(F)(F)F)=C6)=C4O1)C7=C3C=CC=C7	1.82972	0.267093	1.21505	0.0633052	0.146649	0.0314631	0.106625	0	21.0388
239	J. Org. Chem. 2012, 77, 2986	2	THF	S01aa	Nua01	Faa10	P01aaNua01	1	20	25	24	C1CCCO1	O=C1C2=CC=CC=C2C3(C4=CNC5=C4C=CC=C5)N1CCC6=CC(OC)=C(OC)C=C63	O=C1C2=CC=CC=C2C3(O)N1CCC4=CC(OC)=C(OC)C=C43	Indole	C1(C=CN2)=C2C=CC=C1	IV-R	O=P1(O)OC([C@@]([C@@]2=C(C(C)C)C=C(C(C)C)C=C2C(C)C)=C3)=[C@@]([C@@]4=C(C=CC=C5)C5=CC(C6=C(C(C)C)C=C(C(C)C)C=C6C(C)C)=C4O1)C7=C3C=CC=C7	2.01504	0.283503	0.957275	0.0843007	0.146649	0.0314631	0.106625	0	21.0388
240	E. Aranzamendi, PhD Thesis, UPV/EHU	2	THF	S01ca	Nua01	Faa01	P01caNua01	1	20	25	24	C1CCCO1	O=C1C2=CC=CC=C2C3(C4=CN([H])C5=C4C=CC=C5)N1CCC6=CC(OC)=C(OC)C(OC)=C63	O=C1C2=CC=CC=C2C3(O)N1CCC4=CC(OC)=C(OC)C(OC)=C43	Indole	C1(C=CN2)=C2C=CC=C1	I-R	[H]C1=CC2=C([C@]([C@]3=C(C=CC=C4)C4=CC([H])=C3O5)=C1OP5(O)=O)C=CC=C2	2.80027	0.607811	1.44251	0.184585	0.146649	0.0349842	0.114301	0	20.7628
241	E. Aranzamendi, PhD Thesis, UPV/EHU	2	THF	S01ca	Nua01	Faa01	P01caNua01	1	20	25	24	C1CCCO1	O=C1C2=CC=CC=C2C3(C4=CN([H])C5=C4C=CC=C5)N1CCC6=CC(OC)=C(OC)C(OC)=C63	O=C1C2=CC=CC=C2C3(O)N1CCC4=CC(OC)=C(OC)C(OC)=C43	Indole	C1(C=CN2)=C2C=CC=C1	I-R	O=P1(O)OC(C=C2)=C(C3=C(C=CC=C4)C4=CC=C3O1)C5=C2C=CC=C5	2.80027	0.607811	1.44251	0.184585	0.146649	0.0349842	0.114301	0	20.7628
242	Eur. J. Org. Chem. 2011, 3060	-2	CHCl3	S03ca	Nua01	Fac07	P03caNua01	-1	5	20	0.5	ClC(Cl)Cl	O=C1C2=CC=CC=C2[C@@](C3=CNC4=C3C=CC=C4)(CC)N1	OC1(CC)NC(C2=CC=CC=C21)=O	Indole	C12=CC=CC=C1C=CN2	XXVIII-S	O=P1(NS(=O)(C(F)(F)F)=O)OC(C([Si](C2=CC=CC=C2)(C3=CC=CC=C3)C4=CC=CC=C4)=C5)=[C@]([C@]6=C(C=CC=C7)C7=CC([Si](C8=CC=CC=C8)(C9=CC=CC=C9)C%10=CC=CC=C%10)=C6O1)C%11=C5C=CC=C%11	2.80589	0.372455	1.28859	0.136625	0.146649	0.0304457	0.151994	0	21.5097
243	Org. Lett. 2013, 15, 2688.	0	Et2O	S06aa	Nuc02	Fba11	P06aaNuc01	-1	5	25	48	CCOCC	O=C1C2=C(C=CC=C2)C(N1CC3)([H])C4=C3C5=C(N4)C=CC=C5	O=C1C2=C(C=CC=C2)C(N1CC3)(O)C4=C3C5=C(N4)C=CC=C5	Diethyl 1,4-dihydro-2,6-dimethyl-3,5-pyridinedicarboxylate	O=C(C1=C(C)NC(C)=C(C(OCC)=O)C1)OCC	II-S	O=P1(O)OC2=[C@]([C@]3=C(C=CC=C4)C4=CC([Si](C5=CC=CC=C5)(C6=CC=CC=C6)C7=CC=CC=C7)=C3O1)C8=CC=CC=C8C=C2[Si](C9=CC=CC=C9)(C%10=CC=CC=C%10)C%11=CC=CC=C%11	3.25742	0.268405	1.38001	0.0908892	0.484828	0.0308566	0.116958	0	21.6508
244	Eur. J. Org. Chem. 2011, 892	3	CHCl3	S03aa	Nua01	Fba01	P03aaNua01	-1	5	20	156	ClC(Cl)Cl	O=C1C2=C(C=CC=C2)[C@@H](C3=CNC4=C3C=CC=C4)N1	OC1NC(C2=CC=CC=C21)=O	Indole	C12=CC=CC=C1C=CN2	XVII-S	O=P1(O)OC(C=C2)=[C@]([C@]3=C(C=CC=C4)C4=CC=C3O1)C5=C2C=CC=C5	2.80027	0.607811	1.44251	0.184585	0.146649	0.0342038	0.0244598	0	21.273
245	Adv. Synth. Catal. 2013, 355, 836-840	-7	CH2CL2	S02aa	Nua01	Faa06	P02aaNua01	1	10	25	18	ClCCl	O=C1CC[C@@H](C2=CNC3=C2C=CC=C3)N1C4=CC=CC=C4	O=C1N(C2=CC=CC=C2)C(O)CC1	Indole	C12=CC=CC=C1C=CN2	VIa -R	O=P1(O)OC(C(C2=CC=CC=C2)=C3)=[C@@]([C@@]4=C(C=CC=C5)C5=CC(C6=CC=CC=C6)=C4O1)C7=C3C=CC=C7	3.17316	0.417002	1.55014	0.125071	0.146649	0.0304103	0.135072	0	21.3299
246	Eur. J. Org. Chem. 2011, 892	7	CHCl3	S03aa	Nua01	Fba10	P03aaNua01	-1	5	20	168	ClC(Cl)Cl	O=C1C2=C(C=CC=C2)[C@@H](C3=CNC4=C3C=CC=C4)N1	OC1NC(C2=CC=CC=C21)=O	Indole	C12=CC=CC=C1C=CN2	IV-S	O=P1(O)OC(C(C2=C(C(C)C)C=C(C(C)C)C=C2C(C)C)=C3)=[C@]([C@]4=C(C=CC=C5)C5=CC(C6=C(C(C)C)C=C(C(C)C)C=C6C(C)C)=C4O1)C7=C3C=CC=C7	2.01504	0.283503	0.957275	0.0843007	0.146649	0.0342038	0.0244598	0	21.273
247	Eur. J. Org. Chem. 2011, 3060	-9	CHCl3	S03ca	Nua01	Fad03	P03caNua01	1	5	20	0.5	ClC(Cl)Cl	O=C1C2=CC=CC=C2[C@](C3=CNC4=C3C=CC=C4)(CC)N1	OC1(CC)NC(C2=CC=CC=C21)=O	Indole	C12=CC=CC=C1C=CN2	XXX-R	O=P1(NS(=O)(C(F)(F)F)=O)OC(C(C2=CC(C=CC=C3)=C3C4=C2C=CC=C4)=C5)=[C@@]([C@@]6=C(CCCC7)C7=CC(C8=CC(C=CC=C9)=C9C%10=C8C=CC=C%10)=C6O1)C%11=C5CCCC%11	2.30252	0.410143	1.19195	0.140987	0.146649	0.0304457	0.151994	0	21.5097
248	Angew. Chem. Int. Ed. 2011, 50, 5682	-9	Toluene	S02he	Nua01	Faa11	P02adNua01	1	5	20	24	CC1=CC=CC=C1	O=C(N1CC2=CC=CC=C2)CC[C@H]1N3C=CC4=C3C=CC=C4	O=C1N(CC=C1)CC2=CC=CC=C2	Indole	C12=CC=CC=C1C=CN2	II-R	O=P1(O)OC(C([Si](C2=CC=CC=C2)(C3=CC=CC=C3)C4=CC=CC=C4)=C5)=[C@@]([C@@]6=C(C=CC=C7)C7=CC([Si](C8=CC=CC=C8)(C9=CC=CC=C9)C%10=CC=CC=C%10)=C6O1)C%11=C5C=CC=C%11	3.25742	0.268405	1.38001	0.0908892	0.146649	0.0309011	0.17315	3.27778	21.6222
249	Adv. Synth. Catal. 2013, 355, 836-840	-10	1,2-dichloroethane	S02aa	Nua20	Faa04	P02aaNua20	1	5	25	18	ClCCCl	O=C(CC1)N([C@@H]1C2=C(C3=CC=CC=C3)NC4=CC=CC=C42)C5=CC=CC=C5	O=C1N(C2=CC=CC=C2)C(O)CC1	2-phenyl-1H-indole	C12=CC=CC=C1C=C(C3=CC=CC=C3)N2	III-R	O=P1(O)OC(C(C2=CC(C=CC=C3)=C3C4=C2C=CC=C4)=C5)=[C@@]([C@@]6=C(C=CC=C7)C7=CC(C8=C(C=CC=C9)C9=C(C=CC=C%10)C%10=C8)=C6O1)C%11=C5C=CC=C%11	3.41261	0.29396	1.61486	0.0874688	0.0834231	0.022822	0.103004	0	21.3299
250	Angew. Chem. Int. Ed. 2011, 50, 5682	-11	Toluene	S02he	Nua01	Faa04	P02adNua01	1	5	20	24	CC1=CC=CC=C1	O=C(N1CC2=CC=CC=C2)CC[C@H]1N3C=CC4=C3C=CC=C4	O=C1N(CC=C1)CC2=CC=CC=C2	Indole	C12=CC=CC=C1C=CN2	III-R	O=P1(O)OC(C(C2=CC(C=CC=C3)=C3C4=C2C=CC=C4)=C5)=[C@@]([C@@]6=C(C=CC=C7)C7=CC(C8=C(C=CC=C9)C9=C(C=CC=C%10)C%10=C8)=C6O1)C%11=C5C=CC=C%11	3.41261	0.29396	1.61486	0.0874688	0.146649	0.0309011	0.17315	3.27778	21.6222
251	Eur. J. Org. Chem. 2011, 3060	16	CHCl3	S03ca	Nua01	Faa14	P03caNua01	-1	5	20	1	ClC(Cl)Cl	O=C1C2=CC=CC=C2[C@](C3=CNC4=C3C=CC=C4)(CC)N1	OC1(CC)NC(C2=CC=CC=C21)=O	Indole	C12=CC=CC=C1C=CN2	XXIV-S	O=P1(O)OC(C(C2=CC=C(C3=CC=CC=C3)C=C2)=C4)=[C@]([C@]5=C(C=CC=C6)C6=CC(C7=CC=C(C8=CC=CC=C8)C=C7)=C5O1)C9=C4C=CC=C9	3.36676	0.317371	1.60274	0.0945774	0.146649	0.0304457	0.151994	0	21.5097
252	Eur. J. Org. Chem. 2011, 3060	17	CHCl3	S03ca	Nua01	Fba05	P03caNua01	-1	5	20	0.5	ClC(Cl)Cl	O=C1C2=CC=CC=C2[C@](C3=CNC4=C3C=CC=C4)(CC)N1	OC1(CC)NC(C2=CC=CC=C21)=O	Indole	C12=CC=CC=C1C=CN2	VIII-S	O=P1(O)OC(C(C2=CC=C(C=CC=C3)C3=C2)=C4)=[C@]([C@]5=C(C=CC=C6)C6=CC(C7=CC=C(C=CC=C8)C8=C7)=C5O1)C9=C4C=CC=C9	3.31315	0.344834	1.5884	0.102944	0.146649	0.0304457	0.151994	0	21.5097
253	Adv. Synth. Catal. 2013, 355, 836-840	-19	1,2-dichloroethane	S02aa	Nua26	Faa04	P02aaNua26	1	5	25	18	ClCCCl	O=C(CC1)N([C@@H]1C2=CN(C3=CC=CC=C32)CC4=CC=CC=C4)C5=CC=CC=C5	O=C1N(C2=CC=CC=C2)C(O)CC1	1-benzyl-1H-indole	C12=CC=CC=C1C=CN2CC3=CC=CC=C3	III-R	O=P1(O)OC(C(C2=CC(C=CC=C3)=C3C4=C2C=CC=C4)=C5)=[C@@]([C@@]6=C(C=CC=C7)C7=CC(C8=C(C=CC=C9)C9=C(C=CC=C%10)C%10=C8)=C6O1)C%11=C5C=CC=C%11	3.41261	0.29396	1.61486	0.0874688	0.0847467	0.0225961	0.115108	0	21.3299
254	Angew. Chem. Int. Ed. 2011, 50, 5682	-19	Toluene	S02he	Nua01	Faa05	P02adNua01	1	5	20	24	CC1=CC=CC=C1	O=C(N1CC2=CC=CC=C2)CC[C@H]1N3C=CC4=C3C=CC=C4	O=C1N(CC=C1)CC2=CC=CC=C2	Indole	C12=CC=CC=C1C=CN2	VIII-R	O=P1(O)OC(C(C2=CC=C(C=CC=C3)C3=C2)=C4)=[C@@]([C@@]5=C(C=CC=C6)C6=CC(C7=CC=C(C=CC=C8)C8=C7)=C5O1)C9=C4C=CC=C9	3.31315	0.344834	1.5884	0.102944	0.146649	0.0309011	0.17315	3.27778	21.6222
255	Adv. Synth. Catal. 2013, 355, 836-840	-20	1,2-dichloroethane	S02aa	Nua18	Faa04	P02aaNua18	1	5	25	18	ClCCCl	BrCCC1=CN(C2CCC(N2C3=CC=CC=C3)=O)C4=CC=CC=C41	O=C1N(C2=CC=CC=C2)C(O)CC1	3-(2-bromoethyl)-1H-indole	BrCCC1=CNC2=CC=CC=C21	III-R	O=P1(O)OC(C(C2=CC(C=CC=C3)=C3C4=C2C=CC=C4)=C5)=[C@@]([C@@]6=C(C=CC=C7)C7=CC(C8=C(C=CC=C9)C9=C(C=CC=C%10)C%10=C8)=C6O1)C%11=C5C=CC=C%11	3.41261	0.29396	1.61486	0.0874688	0.226608	0.0269397	0.190571	0	21.3299
256	Eur. J. Org. Chem. 2011, 3060	-20	CHCl3	S03ca	Nua01	Fad02	P03caNua01	1	5	20	0.5	ClC(Cl)Cl	O=C1C2=CC=CC=C2[C@](C3=CNC4=C3C=CC=C4)(CC)N1	OC1(CC)NC(C2=CC=CC=C21)=O	Indole	C12=CC=CC=C1C=CN2	XXIX-R	O=P1(NS(=O)(C(F)(F)F)=O)OC(C(C2=CC=C(C=CC=C3)C3=C2)=C4)=[C@@]([C@@]5=C(CCCC6)C6=CC(C7=CC=C(C=CC=C8)C8=C7)=C5O1)C9=C4CCCC9	2.06737	0.469635	1.09837	0.16072	0.146649	0.0304457	0.151994	0	21.5097
257	Angew. Chem. Int. Ed. 2011, 50, 5682	-22	Toluene	S02he	Nua01	Faa06	P02adNua01	1	5	20	24	CC1=CC=CC=C1	O=C(N1CC2=CC=CC=C2)CC[C@H]1N3C=CC4=C3C=CC=C4	O=C1N(CC=C1)CC2=CC=CC=C2	Indole	C12=CC=CC=C1C=CN2	VIa -R	O=P1(O)OC(C(C2=CC=CC=C2)=C3)=[C@@]([C@@]4=C(C=CC=C5)C5=CC(C6=CC=CC=C6)=C4O1)C7=C3C=CC=C7	3.17316	0.417002	1.55014	0.125071	0.146649	0.0309011	0.17315	3.27778	21.6222
258	Eur. J. Org. Chem. 2011, 3060	23	CHCl3	S03ca	Nua01	Faa13	P03caNua01	-1	5	20	1	ClC(Cl)Cl	O=C1C2=CC=CC=C2[C@](C3=CNC4=C3C=CC=C4)(CC)N1	OC1(CC)NC(C2=CC=CC=C21)=O	Indole	C12=CC=CC=C1C=CN2	XXIII-S	O=P1(O)OC(C(C2=CC=C(Cl)C=C2)=C3)=[C@]([C@]4=C(C=CC=C5)C5=CC(C6=CC=C(Cl)C=C6)=C4O1)C7=C3C=CC=C7	2.84278	0.391107	1.42203	0.108407	0.146649	0.0304457	0.151994	0	21.5097
259	Eur. J. Org. Chem. 2011, 892	27	CHCl3	S03aa	Nua01	Fba11	P03aaNua01	-1	5	20	132	ClC(Cl)Cl	O=C1C2=C(C=CC=C2)[C@@H](C3=CNC4=C3C=CC=C4)N1	OC1NC(C2=CC=CC=C21)=O	Indole	C12=CC=CC=C1C=CN2	II-S	O=P1(O)OC(C([Si](C2=CC=CC=C2)(C3=CC=CC=C3)C4=CC=CC=C4)=C5)=[C@]([C@]6=C(C=CC=C7)C7=CC([Si](C8=CC=CC=C8)(C9=CC=CC=C9)C%10=CC=CC=C%10)=C6O1)C%11=C5C=CC=C%11	3.25742	0.268405	1.38001	0.0908892	0.146649	0.0342038	0.0244598	0	21.273
260	Org. Lett. 2013, 15, 2688.	-30	CH2CL2	S06aa	Nuc02	Faf01	P06aaNuc01	1	5	25	12	ClCCl	O=C1C2=C(C=CC=C2)C(N1CC3)([H])C4=C3C5=C(N4)C=CC=C5	O=C1C2=C(C=CC=C2)C(N1CC3)(O)C4=C3C5=C(N4)C=CC=C5	Diethyl 1,4-dihydro-2,6-dimethyl-3,5-pyridinedicarboxylate	O=C(C1=C(C)NC(C)=C(C(OCC)=O)C1)OCC	XXXIII-R	O=P1(O)OC2=C(C3(C4=C(CC3)C=CC(C5=C(C=CC=C6)C6=CC=C5)=C4O1)CC7)C7=CC=C2C8=CC=CC9=C8C=CC=C9	2.70221	0.368767	1.30425	0.110259	0.484828	0.0308566	0.116958	0	21.6508
261	Eur. J. Org. Chem. 2011, 3060	-31	CHCl3	S03ca	Nua01	Fab05	P03caNua01	1	5	20	0.5	ClC(Cl)Cl	O=C1C2=CC=CC=C2[C@](C3=CNC4=C3C=CC=C4)(CC)N1	OC1(CC)NC(C2=CC=CC=C21)=O	Indole	C12=CC=CC=C1C=CN2	XXII-R	O=P1(O)OC(C(C2=CC(C=CC=C3)=C3C4=C2C=CC=C4)=C5)=[C@@]([C@@]6=C(CCCC7)C7=CC(C8=CC(C=CC=C9)=C9C%10=C8C=CC=C%10)=C6O1)C%11=C5CCCC%11	2.7401	0.29396	1.29951	0.0874688	0.146649	0.0304457	0.151994	0	21.5097
262	Adv. Synth. Catal. 2013, 355, 836-840	-38	CH2CL2	S02aa	Nua01	Faa02	P02aaNua01	1	10	25	18	ClCCl	O=C1CC[C@@H](C2=CNC3=C2C=CC=C3)N1C4=CC=CC=C4	O=C1N(C2=CC=CC=C2)C(O)CC1	Indole	C12=CC=CC=C1C=CN2	VII -R	O=P1(O)OC([C@@]([C@@]2=C(C=CC=C3)C3=CC4=C2C=CC=C4)=C5)=[C@@]([C@@]6=C(C=CC=C7)C7=CC(C8=C(C=CC=C9)C9=CC%10=C8C=CC=C%10)=C6O1)C%11=C5C=CC=C%11	3.41261	0.29396	1.61486	0.0874688	0.146649	0.0304103	0.135072	0	21.3299
263	Eur. J. Org. Chem. 2011, 892	39	CHCl3	S03aa	Nua01	Faa07	P03aaNua01	-1	5	20	120	ClC(Cl)Cl	O=C1C2=C(C=CC=C2)[C@@H](C3=CNC4=C3C=CC=C4)N1	OC1NC(C2=CC=CC=C21)=O	Indole	C12=CC=CC=C1C=CN2	XVIII-S	O=P1(O)OC(C(C2=CC=CC=C2)=C3)=[C@]([C@]4=C(C=CC=C5)C5=CC(C6=CC=CC=C6)=C4O1)C7=C3C=CC=C7	3.17316	0.417002	1.55014	0.125071	0.146649	0.0342038	0.0244598	0	21.273
264	Eur. J. Org. Chem. 2011, 892	47	CHCl3	S03aa	Nua01	Fba05	P03aaNua01	-1	5	20	120	ClC(Cl)Cl	O=C1C2=C(C=CC=C2)[C@@H](C3=CNC4=C3C=CC=C4)N1	OC1NC(C2=CC=CC=C21)=O	Indole	C12=CC=CC=C1C=CN2	VIII-S	O=P1(O)OC(C(C2=CC=C(C=CC=C3)C3=C2)=C4)=[C@]([C@]5=C(C=CC=C6)C6=CC(C7=CC=C(C=CC=C8)C8=C7)=C5O1)C9=C4C=CC=C9	3.31315	0.344834	1.5884	0.102944	0.146649	0.0342038	0.0244598	0	21.273
265	Eur. J. Org. Chem. 2011, 3060	-53	CHCl3	S03ca	Nua01	Fab02	P03caNua01	1	5	20	24	ClC(Cl)Cl	O=C1C2=CC=CC=C2[C@](C3=CNC4=C3C=CC=C4)(CC)N1	OC1(CC)NC(C2=CC=CC=C21)=O	Indole	C12=CC=CC=C1C=CN2	XXVII-R	O=P1(O)OC(C([Si](C2=CC=CC=C2)(C3=CC=CC=C3)C4=CC=CC=C4)=C5)=[C@@]([C@@]6=C(CCCC7)C7=CC([Si](C8=CC=CC=C8)(C9=CC=CC=C9)C%10=CC=CC=C%10)=C6O1)C%11=C5CCCC%11	2.68798	0.268405	1.1324	0.0908892	0.146649	0.0304457	0.151994	0	21.5097
266	Angew. Chem. Int. Ed. 2011, 50, 5682	-56	Toluene	S02he	Nua01	Faa02	P02adNua01	1	5	20	24	CC1=CC=CC=C1	O=C(N1CC2=CC=CC=C2)CC[C@H]1N3C=CC4=C3C=CC=C4	O=C1N(CC=C1)CC2=CC=CC=C2	Indole	C12=CC=CC=C1C=CN2	VII -R	O=P1(O)OC([C@@]([C@@]2=C(C=CC=C3)C3=CC4=C2C=CC=C4)=C5)=[C@@]([C@@]6=C(C=CC=C7)C7=CC(C8=C(C=CC=C9)C9=CC%10=C8C=CC=C%10)=C6O1)C%11=C5C=CC=C%11	3.41261	0.29396	1.61486	0.0874688	0.146649	0.0309011	0.17315	3.27778	21.6222
267	Angew. Chem. Int. Ed. 2011, 50, 5682	-60	Benzene	S02he	Nua01	Faa10	P02adNua01	1	5	20	24	C1=CC=CC=C1	O=C(N1CC2=CC=CC=C2)CC[C@H]1N3C=CC4=C3C=CC=C4	O=C1N(CC=C1)CC2=CC=CC=C2	Indole	C12=CC=CC=C1C=CN2	IV-R	O=P1(O)OC([C@@]([C@@]2=C(C(C)C)C=C(C(C)C)C=C2C(C)C)=C3)=[C@@]([C@@]4=C(C=CC=C5)C5=CC(C6=C(C(C)C)C=C(C(C)C)C=C6C(C)C)=C4O1)C7=C3C=CC=C7	2.01504	0.283503	0.957275	0.0843007	0.146649	0.0309011	0.17315	4	21.6222
268	Adv. Synth. Catal. 2013, 355, 836-840	-60	CH2CL2	S02aa	Nua01	Faa05	P02aaNua01	1	10	25	18	ClCCl	O=C1CC[C@@H](C2=CNC3=C2C=CC=C3)N1C4=CC=CC=C4	O=C1N(C2=CC=CC=C2)C(O)CC1	Indole	C12=CC=CC=C1C=CN2	VIII-R	O=P1(O)OC(C(C2=CC=C(C=CC=C3)C3=C2)=C4)=[C@@]([C@@]5=C(C=CC=C6)C6=CC(C7=CC=C(C=CC=C8)C8=C7)=C5O1)C9=C4C=CC=C9	3.31315	0.344834	1.5884	0.102944	0.146649	0.0304103	0.135072	0	21.3299
269	Eur. J. Org. Chem. 2011, 892	63	CHCl3	S03aa	Nua01	Faa03	P03aaNua01	-1	5	20	132	ClC(Cl)Cl	O=C1C2=C(C=CC=C2)[C@@H](C3=CNC4=C3C=CC=C4)N1	OC1NC(C2=CC=CC=C21)=O	Indole	C12=CC=CC=C1C=CN2	VII-S	O=P1(O)OC(C(C2=C(C=CC=C3)C3=CC4=C2C=CC=C4)=C5)=[C@]([C@]6=C(C=CC=C7)C7=CC(C8=C(C=CC=C9)C9=CC%10=C8C=CC=C%10)=C6O1)C%11=C5C=CC=C%11	3.41261	0.29396	1.61486	0.0874688	0.146649	0.0342038	0.0244598	0	21.273
270	Adv. Synth. Catal. 2013, 355, 836-840	-64	1,2-dichloroethane	S02ae	Nua01	Faa04	P02adNua01	1	5	25	18	ClCCCl	O=C1CC[C@@H](C2=CNC3=C2C=CC=C3)N1CC4=CC=CC=C4	O=C1N(CC2=CC=CC=C2)C(O)CC1	Indole	C12=CC=CC=C1C=CN2	III-R	O=P1(O)OC(C(C2=CC(C=CC=C3)=C3C4=C2C=CC=C4)=C5)=[C@@]([C@@]6=C(C=CC=C7)C7=CC(C8=C(C=CC=C9)C9=C(C=CC=C%10)C%10=C8)=C6O1)C%11=C5C=CC=C%11	3.41261	0.29396	1.61486	0.0874688	0.146649	0.0293469	0.150012	0	21.3918
271	Angew. Chem. Int. Ed. 2011, 50, 5682	-66	1,2-dichloroethane	S02he	Nua01	Faa10	P02adNua01	1	5	20	24	ClCCCl	O=C(N1CC2=CC=CC=C2)CC[C@H]1N3C=CC4=C3C=CC=C4	O=C1N(CC=C1)CC2=CC=CC=C2	Indole	C12=CC=CC=C1C=CN2	IV-R	O=P1(O)OC([C@@]([C@@]2=C(C(C)C)C=C(C(C)C)C=C2C(C)C)=C3)=[C@@]([C@@]4=C(C=CC=C5)C5=CC(C6=C(C(C)C)C=C(C(C)C)C=C6C(C)C)=C4O1)C7=C3C=CC=C7	2.01504	0.283503	0.957275	0.0843007	0.146649	0.0309011	0.17315	0	21.6222
272	Adv. Synth. Catal. 2013, 355, 836-840	-75	CH2CL2	S02aa	Nua01	Faa09	P02aaNua01	1	10	25	18	ClCCl	O=C1CC[C@@H](C2=CNC3=C2C=CC=C3)N1C4=CC=CC=C4	O=C1N(C2=CC=CC=C2)C(O)CC1	Indole	C12=CC=CC=C1C=CN2	IX-R	O=P1(O)OC(C(C2=CC=CC3=C2C=CC=C3)=C4)=[C@@]([C@@]5=C(C=CC=C6)C6=CC(C7=C(C=CC=C8)C8=CC=C7)=C5O1)C9=C4C=CC=C9	3.31315	0.344834	1.5884	0.102944	0.146649	0.0304103	0.135072	0	21.3299
273	Angew. Chem. Int. Ed. 2011, 50, 5682	-80	Toluene	S02he	Nua10	Faa10	P02adNua10	1	5	20	36	CC1=CC=CC=C1	O=C(N1CC2=CC=CC=C2)CC[C@H]1N3C=CC4=C3C=CC(F)=C4	O=C1N(CC=C1)CC2=CC=CC=C2	5-fluoro-1H-indole	FC1=CC=C(NC=C2)C2=C1	IV-R	O=P1(O)OC([C@@]([C@@]2=C(C(C)C)C=C(C(C)C)C=C2C(C)C)=C3)=[C@@]([C@@]4=C(C=CC=C5)C5=CC(C6=C(C(C)C)C=C(C(C)C)C=C6C(C)C)=C4O1)C7=C3C=CC=C7	2.01504	0.283503	0.957275	0.0843007	0.321285	0.0304334	0.152847	3.27778	21.6222
274	Angew. Chem. Int. Ed. 2011, 50, 5682	-80	Toluene	S02he	Nua04	Faa10	P02adNua04	1	5	20	36	CC1=CC=CC=C1	O=C(N1CC2=CC=CC=C2)CC[C@H]1N3C=CC4=C3C=CC(Br)=C4	O=C1N(CC=C1)CC2=CC=CC=C2	5-bromo-1H-indole	BrC1=CC=C(NC=C2)C2=C1	IV-R	O=P1(O)OC([C@@]([C@@]2=C(C(C)C)C=C(C(C)C)C=C2C(C)C)=C3)=[C@@]([C@@]4=C(C=CC=C5)C5=CC(C6=C(C(C)C)C=C(C(C)C)C=C6C(C)C)=C4O1)C7=C3C=CC=C7	2.01504	0.283503	0.957275	0.0843007	0.254958	0.0285145	0.153043	3.27778	21.6222
275	Angew. Chem. Int. Ed. 2011, 50, 5682	-81	Et2O	S02he	Nua01	Faa10	P02adNua01	1	5	20	24	CCOCC	O=C(N1CC2=CC=CC=C2)CC[C@H]1N3C=CC4=C3C=CC=C4	O=C1N(CC=C1)CC2=CC=CC=C2	Indole	C12=CC=CC=C1C=CN2	IV-R	O=P1(O)OC([C@@]([C@@]2=C(C(C)C)C=C(C(C)C)C=C2C(C)C)=C3)=[C@@]([C@@]4=C(C=CC=C5)C5=CC(C6=C(C(C)C)C=C(C(C)C)C=C6C(C)C)=C4O1)C7=C3C=CC=C7	2.01504	0.283503	0.957275	0.0843007	0.146649	0.0309011	0.17315	0	21.6222
276	Adv. Synth. Catal. 2013, 355, 836-840	-82	CH2CL2	S02aa	Nua01	Faa04	P02aaNua01	1	10	25	18	ClCCl	O=C1CC[C@@H](C2=CNC3=C2C=CC=C3)N1C4=CC=CC=C4	O=C1N(C2=CC=CC=C2)C(O)CC1	Indole	C12=CC=CC=C1C=CN2	III-R	O=P1(O)OC(C(C2=CC(C=CC=C3)=C3C4=C2C=CC=C4)=C5)=[C@@]([C@@]6=C(C=CC=C7)C7=CC(C8=C(C=CC=C9)C9=C(C=CC=C%10)C%10=C8)=C6O1)C%11=C5C=CC=C%11	3.41261	0.29396	1.61486	0.0874688	0.146649	0.0304103	0.135072	0	21.3299
277	Angew. Chem. Int. Ed. 2011, 50, 5682	-82	o-xylene	S02he	Nua01	Faa10	P02adNua01	1	5	20	24	CC1=C(C)C=CC=C1	O=C(N1CC2=CC=CC=C2)CC[C@H]1N3C=CC4=C3C=CC=C4	O=C1N(CC=C1)CC2=CC=CC=C2	Indole	C12=CC=CC=C1C=CN2	IV-R	O=P1(O)OC([C@@]([C@@]2=C(C(C)C)C=C(C(C)C)C=C2C(C)C)=C3)=[C@@]([C@@]4=C(C=CC=C5)C5=CC(C6=C(C(C)C)C=C(C(C)C)C=C6C(C)C)=C4O1)C7=C3C=CC=C7	2.01504	0.283503	0.957275	0.0843007	0.146649	0.0309011	0.17315	2.76157	21.6222
278	Angew. Chem. Int. Ed. 2011, 50, 5682	-82	Toluene	S02he	Nua13	Fag01	P02adNua13	1	10	20	36	CC1=CC=CC=C1	O=C(N1CC2=CC=CC=C2)CC[C@H]1N3C=C(C)C4=C3C=CC=C4	O=C1N(CC=C1)CC2=CC=CC=C2	3-methyl-1H-indole	CC1=CNC2=CC=CC=C21	XXXI-R	O=P1(S)OC([C@@]([C@@]2=C(C(C)C)C=C(C(C)C)C=C2C(C)C)=C3)=[C@@]([C@@]4=C(C=CC=C5)C5=CC(C6=C(C(C)C)C=C(C(C)C)C=C6C(C)C)=C4O1)C7=C3C=CC=C7	2.01504	0.264135	0.936536	0.101918	0.132215	0.0294774	0.184801	3.27778	21.6222
279	Adv. Synth. Catal. 2013, 355, 836-840	-83	1,2-dichloroethane	S02ac	Nua01	Faa04	P02acNua01	1	5	25	18	ClCCCl	O=C(CC1)N([C@@H]1C2=CNC3=CC=CC=C32)C4=CC=C(Br)C=C4	O=C1N(C2=CC=C(Br)C=C2)C(O)CC1	Indole	C12=CC=CC=C1C=CN2	III-R	O=P1(O)OC(C(C2=CC(C=CC=C3)=C3C4=C2C=CC=C4)=C5)=[C@@]([C@@]6=C(C=CC=C7)C7=CC(C8=C(C=CC=C9)C9=C(C=CC=C%10)C%10=C8)=C6O1)C%11=C5C=CC=C%11	3.41261	0.29396	1.61486	0.0874688	0.146649	0.027952	0.118671	0	21.9837
280	Angew. Chem. Int. Ed. 2011, 50, 5682	-83	Toluene	S02he	Nua12	Faa10	P02adNua12	1	5	20	36	CC1=CC=CC=C1	O=C(N1CC2=CC=CC=C2)CC[C@H]1N3C=CC4=C3C=CC(C)=C4	O=C1N(CC=C1)CC2=CC=CC=C2	5-methyl-1H-indole	CC1=CC=C(NC=C2)C2=C1	IV-R	O=P1(O)OC([C@@]([C@@]2=C(C(C)C)C=C(C(C)C)C=C2C(C)C)=C3)=[C@@]([C@@]4=C(C=CC=C5)C5=CC(C6=C(C(C)C)C=C(C(C)C)C=C6C(C)C)=C4O1)C7=C3C=CC=C7	2.01504	0.283503	0.957275	0.0843007	0.132215	0.0294774	0.184801	3.27778	21.6222
281	Angew. Chem. Int. Ed. 2011, 50, 5682	-83	Toluene	S02he	Nua05	Faa10	P02adNua05	1	5	20	36	CC1=CC=CC=C1	O=C(N1CC2=CC=CC=C2)CC[C@H]1N3C=CC4=C3C=CC=C4Br	O=C1N(CC=C1)CC2=CC=CC=C2	4-bromo-1H-indole	BrC1=C2C(NC=C2)=CC=C1	IV-R	O=P1(O)OC([C@@]([C@@]2=C(C(C)C)C=C(C(C)C)C=C2C(C)C)=C3)=[C@@]([C@@]4=C(C=CC=C5)C5=CC(C6=C(C(C)C)C=C(C(C)C)C=C6C(C)C)=C4O1)C7=C3C=CC=C7	2.01504	0.283503	0.957275	0.0843007	0.254958	0.0285145	0.153043	3.27778	21.6222
282	Adv. Synth. Catal. 2013, 355, 836-840	-85	1,2-dichloroethane	S02aa	Nua08	Faa04	P02aaNua08	1	5	25	18	ClCCCl	O=C(CC1)N([C@@H]1C2=CNC3=CC=C([N+]([O-])=O)C=C32)C4=CC=CC=C4	O=C1N(C2=CC=CC=C2)C(O)CC1	5-nitro-1H-indole	O=[N+](C1=CC=C(NC=C2)C2=C1)[O-]	III-R	O=P1(O)OC(C(C2=CC(C=CC=C3)=C3C4=C2C=CC=C4)=C5)=[C@@]([C@@]6=C(C=CC=C7)C7=CC(C8=C(C=CC=C9)C9=C(C=CC=C%10)C%10=C8)=C6O1)C%11=C5C=CC=C%11	3.41261	0.29396	1.61486	0.0874688	0.96242	0.0771374	0.120273	0	21.3299
283	Angew. Chem. Int. Ed. 2011, 50, 5682	-86	Toluene	S02he	Nua10	Fag01	P02adNua10	1	10	20	36	CC1=CC=CC=C1	O=C(N1CC2=CC=CC=C2)CC[C@H]1N3C=CC4=C3C=CC(F)=C4	O=C1N(CC=C1)CC2=CC=CC=C2	5-fluoro-1H-indole	FC1=CC=C(NC=C2)C2=C1	XXXI-R	O=P1(S)OC([C@@]([C@@]2=C(C(C)C)C=C(C(C)C)C=C2C(C)C)=C3)=[C@@]([C@@]4=C(C=CC=C5)C5=CC(C6=C(C(C)C)C=C(C(C)C)C=C6C(C)C)=C4O1)C7=C3C=CC=C7	2.01504	0.264135	0.936536	0.101918	0.321285	0.0304334	0.152847	3.27778	21.6222
284	Angew. Chem. Int. Ed. 2011, 50, 5682	-86	Toluene	S02he	Nua06	Faa10	P02adNua06	1	5	20	36	CC1=CC=CC=C1	O=C(N1CC2=CC=CC=C2)CC[C@H]1N3C=CC4=C3C=C(Cl)C=C4	O=C1N(CC=C1)CC2=CC=CC=C2	6-chloro-1H-indole	ClC1=CC=C2C(NC=C2)=C1	IV-R	O=P1(O)OC([C@@]([C@@]2=C(C(C)C)C=C(C(C)C)C=C2C(C)C)=C3)=[C@@]([C@@]4=C(C=CC=C5)C5=CC(C6=C(C(C)C)C=C(C(C)C)C=C6C(C)C)=C4O1)C7=C3C=CC=C7	2.01504	0.283503	0.957275	0.0843007	0.275374	0.0291568	0.151738	3.27778	21.6222
285	Angew. Chem. Int. Ed. 2011, 50, 5682	-86	Toluene	S02he	Nua03	Faa10	P02adNua03	1	5	20	36	CC1=CC=CC=C1	O=C(N1CC2=CC=CC=C2)CC[C@H]1N3C=CC4=C3C=CC(OC)=C4	O=C1N(CC=C1)CC2=CC=CC=C2	5-methoxy-1H-indole	COC1=CC=C(NC=C2)C2=C1	IV-R	O=P1(O)OC([C@@]([C@@]2=C(C(C)C)C=C(C(C)C)C=C2C(C)C)=C3)=[C@@]([C@@]4=C(C=CC=C5)C5=CC(C6=C(C(C)C)C=C(C(C)C)C=C6C(C)C)=C4O1)C7=C3C=CC=C7	2.01504	0.283503	0.957275	0.0843007	0.296117	0.0354064	0.177617	3.27778	21.6222
286	Angew. Chem. Int. Ed. 2011, 50, 5682	-86	Toluene	S02he	Nua30	Fag01	P02adNua30	1	10	20	36	CC1=CC=CC=C1	O=C(N1CC2=CC=CC=C2)CC[C@H]1N3C4=C(CCCC4)C5=C3C=CC(Cl)=C5	O=C1N(CC=C1)CC2=CC=CC=C2	6-chloro-2,3,4,9-tetrahydro-1H-carbazole	ClC1=CC=C(NC2=C3CCCC2)C3=C1	XXXI-R	O=P1(S)OC([C@@]([C@@]2=C(C(C)C)C=C(C(C)C)C=C2C(C)C)=C3)=[C@@]([C@@]4=C(C=CC=C5)C5=CC(C6=C(C(C)C)C=C(C(C)C)C=C6C(C)C)=C4O1)C7=C3C=CC=C7	2.01504	0.264135	0.936536	0.101918	0.193567	0.0243378	0.274767	3.27778	21.6222
287	Angew. Chem. Int. Ed. 2011, 50, 5682	-86	Toluene	S02he	Nua29	Fag01	P02adNua29	1	10	20	36	CC1=CC=CC=C1	O=C(N1CC2=CC=CC=C2)CC[C@H]1N3C4=C(CCCC4)C5=C3C=CC(C)=C5	O=C1N(CC=C1)CC2=CC=CC=C2	6-methyl-2,3,4,9-tetrahydro-1H-carbazole	CC1=CC=C(NC2=C3CCCC2)C3=C1	XXXI-R	O=P1(S)OC([C@@]([C@@]2=C(C(C)C)C=C(C(C)C)C=C2C(C)C)=C3)=[C@@]([C@@]4=C(C=CC=C5)C5=CC(C6=C(C(C)C)C=C(C(C)C)C=C6C(C)C)=C4O1)C7=C3C=CC=C7	2.01504	0.264135	0.936536	0.101918	0.0893145	0.0245637	0.311655	3.27778	21.6222
288	Angew. Chem. Int. Ed. 2011, 50, 5682	-87	Toluene	S02he	Nua01	Faa10	P02adNua01	1	5	20	24	CC1=CC=CC=C1	O=C(N1CC2=CC=CC=C2)CC[C@H]1N3C=CC4=C3C=CC=C4	O=C1N(CC=C1)CC2=CC=CC=C2	Indole	C12=CC=CC=C1C=CN2	IV-R	O=P1(O)OC([C@@]([C@@]2=C(C(C)C)C=C(C(C)C)C=C2C(C)C)=C3)=[C@@]([C@@]4=C(C=CC=C5)C5=CC(C6=C(C(C)C)C=C(C(C)C)C=C6C(C)C)=C4O1)C7=C3C=CC=C7	2.01504	0.283503	0.957275	0.0843007	0.146649	0.0309011	0.17315	3.27778	21.6222
289	Angew. Chem. Int. Ed. 2011, 50, 5682	-87	Toluene	S02he	Nua01	Faa10	P02adNua01	1	5	20	36	CC1=CC=CC=C1	O=C(N1CC2=CC=CC=C2)CC[C@H]1N3C=CC4=C3C=CC=C4	O=C1N(CC=C1)CC2=CC=CC=C2	Indole	C12=CC=CC=C1C=CN2	IV-R	O=P1(O)OC([C@@]([C@@]2=C(C(C)C)C=C(C(C)C)C=C2C(C)C)=C3)=[C@@]([C@@]4=C(C=CC=C5)C5=CC(C6=C(C(C)C)C=C(C(C)C)C=C6C(C)C)=C4O1)C7=C3C=CC=C7	2.01504	0.283503	0.957275	0.0843007	0.146649	0.0309011	0.17315	3.27778	21.6222
290	Angew. Chem. Int. Ed. 2011, 50, 5682	-87	Toluene	S02he	Nua32	Fag01	P02adNua32	1	10	20	36	CC1=CC=CC=C1	O=C(N1CC2=CC=CC=C2)CC[C@H]1N3C4=C(CCCCCC4)C5=C3C=CC=C5	O=C1N(CC=C1)CC2=CC=CC=C2	6,7,8,9,10,11-hexahydro-5H-cycloocta[b]indole	C12=CC=CC=C1C3=C(CCCCCC3)N2	XXXI-R	O=P1(S)OC([C@@]([C@@]2=C(C(C)C)C=C(C(C)C)C=C2C(C)C)=C3)=[C@@]([C@@]4=C(C=CC=C5)C5=CC(C6=C(C(C)C)C=C(C(C)C)C=C6C(C)C)=C4O1)C7=C3C=CC=C7	2.01504	0.264135	0.936536	0.101918	0.0834231	0.0236439	0.379915	3.27778	21.6222
291	Adv. Synth. Catal. 2013, 355, 836-840	-88	1,2-dichloroethane	S02aa	Nua01	Faa04	P02aaNua01	1	10	25	18	ClCCCl	O=C1CC[C@@H](C2=CNC3=C2C=CC=C3)N1C4=CC=CC=C4	O=C1N(C2=CC=CC=C2)C(O)CC1	Indole	C12=CC=CC=C1C=CN2	III-R	O=P1(O)OC(C(C2=CC(C=CC=C3)=C3C4=C2C=CC=C4)=C5)=[C@@]([C@@]6=C(C=CC=C7)C7=CC(C8=C(C=CC=C9)C9=C(C=CC=C%10)C%10=C8)=C6O1)C%11=C5C=CC=C%11	3.41261	0.29396	1.61486	0.0874688	0.146649	0.0304103	0.135072	0	21.3299
292	Angew. Chem. Int. Ed. 2011, 50, 5682	-88	Toluene	S02he	Nua04	Fag01	P02adNua04	1	10	20	36	CC1=CC=CC=C1	O=C(N1CC2=CC=CC=C2)CC[C@H]1N3C=CC4=C3C=CC(Br)=C4	O=C1N(CC=C1)CC2=CC=CC=C2	5-bromo-1H-indole	BrC1=CC=C(NC=C2)C2=C1	XXXI-R	O=P1(S)OC([C@@]([C@@]2=C(C(C)C)C=C(C(C)C)C=C2C(C)C)=C3)=[C@@]([C@@]4=C(C=CC=C5)C5=CC(C6=C(C(C)C)C=C(C(C)C)C=C6C(C)C)=C4O1)C7=C3C=CC=C7	2.01504	0.264135	0.936536	0.101918	0.254958	0.0285145	0.153043	3.27778	21.6222
293	Adv. Synth. Catal. 2013, 355, 836-840	-90	1,2-dichloroethane	S02aa	Nua14	Faa04	P02aaNua14	1	5	25	18	ClCCCl	O=C(CC1)N([C@@H]1C2=C(C)NC3=CC=CC=C32)C4=CC=CC=C4	O=C1N(C2=CC=CC=C2)C(O)CC1	2-methyl-1H-indole	CC1=CC2=CC=CC=C2N1	III-R	O=P1(O)OC(C(C2=CC(C=CC=C3)=C3C4=C2C=CC=C4)=C5)=[C@@]([C@@]6=C(C=CC=C7)C7=CC(C8=C(C=CC=C9)C9=C(C=CC=C%10)C%10=C8)=C6O1)C%11=C5C=CC=C%11	3.41261	0.29396	1.61486	0.0874688	0.124478	0.0283333	0.155302	0	21.3299
294	Angew. Chem. Int. Ed. 2011, 50, 5682	-90	Toluene	S02he	Nua05	Fag01	P02adNua05	1	10	20	36	CC1=CC=CC=C1	O=C(N1CC2=CC=CC=C2)CC[C@H]1N3C=CC4=C3C=CC=C4Br	O=C1N(CC=C1)CC2=CC=CC=C2	4-bromo-1H-indole	BrC1=C2C(NC=C2)=CC=C1	XXXI-R	O=P1(S)OC([C@@]([C@@]2=C(C(C)C)C=C(C(C)C)C=C2C(C)C)=C3)=[C@@]([C@@]4=C(C=CC=C5)C5=CC(C6=C(C(C)C)C=C(C(C)C)C=C6C(C)C)=C4O1)C7=C3C=CC=C7	2.01504	0.264135	0.936536	0.101918	0.254958	0.0285145	0.153043	3.27778	21.6222
295	Angew. Chem. Int. Ed. 2011, 50, 5682	-90	Toluene	S02he	Nua06	Fag01	P02adNua06	1	10	20	36	CC1=CC=CC=C1	O=C(N1CC2=CC=CC=C2)CC[C@H]1N3C=CC4=C3C=C(Cl)C=C4	O=C1N(CC=C1)CC2=CC=CC=C2	6-chloro-1H-indole	ClC1=CC=C2C(NC=C2)=C1	XXXI-R	O=P1(S)OC([C@@]([C@@]2=C(C(C)C)C=C(C(C)C)C=C2C(C)C)=C3)=[C@@]([C@@]4=C(C=CC=C5)C5=CC(C6=C(C(C)C)C=C(C(C)C)C=C6C(C)C)=C4O1)C7=C3C=CC=C7	2.01504	0.264135	0.936536	0.101918	0.275374	0.0291568	0.151738	3.27778	21.6222
296	Angew. Chem. Int. Ed. 2011, 50, 5682	-90	Toluene	S02he	Nua12	Fag01	P02adNua12	1	10	20	36	CC1=CC=CC=C1	O=C(N1CC2=CC=CC=C2)CC[C@H]1N3C=CC4=C3C=CC(C)=C4	O=C1N(CC=C1)CC2=CC=CC=C2	5-methyl-1H-indole	CC1=CC=C(NC=C2)C2=C1	XXXI-R	O=P1(S)OC([C@@]([C@@]2=C(C(C)C)C=C(C(C)C)C=C2C(C)C)=C3)=[C@@]([C@@]4=C(C=CC=C5)C5=CC(C6=C(C(C)C)C=C(C(C)C)C=C6C(C)C)=C4O1)C7=C3C=CC=C7	2.01504	0.264135	0.936536	0.101918	0.132215	0.0294774	0.184801	3.27778	21.6222
297	Angew. Chem. Int. Ed. 2011, 50, 5682	-90	Toluene	S02he	Nua01	Fag01	P02adNua01	1	10	20	36	CC1=CC=CC=C1	O=C(N1CC2=CC=CC=C2)CC[C@H]1N3C=CC4=C3C=CC=C4	O=C1N(CC=C1)CC2=CC=CC=C2	Indole	C12=CC=CC=C1C=CN2	XXXI-R	O=P1(S)OC([C@@]([C@@]2=C(C(C)C)C=C(C(C)C)C=C2C(C)C)=C3)=[C@@]([C@@]4=C(C=CC=C5)C5=CC(C6=C(C(C)C)C=C(C(C)C)C=C6C(C)C)=C4O1)C7=C3C=CC=C7	2.01504	0.264135	0.936536	0.101918	0.146649	0.0309011	0.17315	3.27778	21.6222
298	Angew. Chem. Int. Ed. 2011, 50, 5682	-90	Toluene	S02he	Nua03	Fag01	P02adNua03	1	10	20	36	CC1=CC=CC=C1	O=C(N1CC2=CC=CC=C2)CC[C@H]1N3C=CC4=C3C=CC(OC)=C4	O=C1N(CC=C1)CC2=CC=CC=C2	5-methoxy-1H-indole	COC1=CC=C(NC=C2)C2=C1	XXXI-R	O=P1(S)OC([C@@]([C@@]2=C(C(C)C)C=C(C(C)C)C=C2C(C)C)=C3)=[C@@]([C@@]4=C(C=CC=C5)C5=CC(C6=C(C(C)C)C=C(C(C)C)C=C6C(C)C)=C4O1)C7=C3C=CC=C7	2.01504	0.264135	0.936536	0.101918	0.296117	0.0354064	0.177617	3.27778	21.6222
299	Angew. Chem. Int. Ed. 2011, 50, 5682	-90	Toluene	S02he	Nua19	Fag01	P02adNua19	1	10	20	36	CC1=CC=CC=C1	O=C(N1CC2=CC=CC=C2)CC[C@H]1N3C(C)=C(C)C4=C3C=CC(Cl)=C4	O=C1N(CC=C1)CC2=CC=CC=C2	5-chloro-2,3-dimethyl-1H-indole	CC1=C(C)NC2=CC=C(Cl)C=C21	XXXI-R	O=P1(S)OC([C@@]([C@@]2=C(C(C)C)C=C(C(C)C)C=C2C(C)C)=C3)=[C@@]([C@@]4=C(C=CC=C5)C5=CC(C6=C(C(C)C)C=C(C(C)C)C=C6C(C)C)=C4O1)C7=C3C=CC=C7	2.01504	0.264135	0.936536	0.101918	0.224723	0.0263707	0.179376	3.27778	21.6222
300	Adv. Synth. Catal. 2013, 355, 836-840	-91	1,2-dichloroethane	S02aa	Nua01	Faa04	P02aaNua01	1	10	25	18	ClCCCl	O=C1CC[C@@H](C2=CNC3=C2C=CC=C3)N1C4=CC=CC=C4	O=C1N(C2=CC=CC=C2)C(O)CC1	Indole	C12=CC=CC=C1C=CN2	III-R	O=P1(O)OC(C(C2=CC(C=CC=C3)=C3C4=C2C=CC=C4)=C5)=[C@@]([C@@]6=C(C=CC=C7)C7=CC(C8=C(C=CC=C9)C9=C(C=CC=C%10)C%10=C8)=C6O1)C%11=C5C=CC=C%11	3.41261	0.29396	1.61486	0.0874688	0.146649	0.0304103	0.135072	0	21.3299
301	Angew. Chem. Int. Ed. 2011, 50, 5682	-91	Toluene	S02he	Nua21	Fag01	P02adNua21	1	10	20	36	CC1=CC=CC=C1	O=C(N1CC2=CC=CC=C2)CC[C@H]1N3C(C4=CC=CC=C4C)=CC5=C3C=CC=C5	O=C1N(CC=C1)CC2=CC=CC=C2	2-o-tolyl-1H-indole	CC1=CC=CC=C1C2=CC3=CC=CC=C3N2	XXXI-R	O=P1(S)OC([C@@]([C@@]2=C(C(C)C)C=C(C(C)C)C=C2C(C)C)=C3)=[C@@]([C@@]4=C(C=CC=C5)C5=CC(C6=C(C(C)C)C=C(C(C)C)C=C6C(C)C)=C4O1)C7=C3C=CC=C7	2.01504	0.264135	0.936536	0.101918	0.0782607	0.0227904	0.144145	3.27778	21.6222
302	Angew. Chem. Int. Ed. 2011, 50, 5682	-91	Toluene	S02he	Nua27	Fag01	P02adNua27	1	10	20	36	CC1=CC=CC=C1	O=C(N1CC2=CC=CC=C2)CC[C@H]1N3C4=C(CCC4)C5=C3C=CC=C5	O=C1N(CC=C1)CC2=CC=CC=C2	1,2,3,4-tetrahydrocyclopenta[b]indole	C12=CC=CC=C1C3=C(CCC3)N2	XXXI-R	O=P1(S)OC([C@@]([C@@]2=C(C(C)C)C=C(C(C)C)C=C2C(C)C)=C3)=[C@@]([C@@]4=C(C=CC=C5)C5=CC(C6=C(C(C)C)C=C(C(C)C)C=C6C(C)C)=C4O1)C7=C3C=CC=C7	2.01504	0.264135	0.936536	0.101918	0.104004	0.0266362	0.266078	3.27778	21.6222
303	Adv. Synth. Catal. 2013, 355, 836-840	-92	1,2-dichloroethane	S02aa	Nua04	Faa04	P02aaNua04	1	5	25	18	ClCCCl	BrC1=CC=C(NC=C2[C@@H]3CCC(N3C4=CC=CC=C4)=O)C2=C1	O=C1N(C2=CC=CC=C2)C(O)CC1	5-bromo-1H-indole	BrC1=CC=C(NC=C2)C2=C1	III-R	O=P1(O)OC(C(C2=CC(C=CC=C3)=C3C4=C2C=CC=C4)=C5)=[C@@]([C@@]6=C(C=CC=C7)C7=CC(C8=C(C=CC=C9)C9=C(C=CC=C%10)C%10=C8)=C6O1)C%11=C5C=CC=C%11	3.41261	0.29396	1.61486	0.0874688	0.254958	0.027952	0.118671	0	21.3299
304	Angew. Chem. Int. Ed. 2011, 50, 5682	-92	Toluene	S02he	Nua17	Fag01	P02adNua17	1	10	20	36	CC1=CC=CC=C1	O=C(N1CC2=CC=CC=C2)CC[C@H]1N3C(C)=C(CCCCC)C4=C3C=CC=C4	O=C1N(CC=C1)CC2=CC=CC=C2	2-methyl-3-pentyl-1H-indole	CC1=C(CCCCC)C2=CC=CC=C2N1	XXXI-R	O=P1(S)OC([C@@]([C@@]2=C(C(C)C)C=C(C(C)C)C=C2C(C)C)=C3)=[C@@]([C@@]4=C(C=CC=C5)C5=CC(C6=C(C(C)C)C=C(C(C)C)C=C6C(C)C)=C4O1)C7=C3C=CC=C7	2.01504	0.264135	0.936536	0.101918	0.0834231	0.0236439	0.37193	3.27778	21.6222
305	Angew. Chem. Int. Ed. 2011, 50, 5682	-92	Toluene	S02he	Nua31	Fag01	P02adNua31	1	10	20	36	CC1=CC=CC=C1	O=C(N1CC2=CC=CC=C2)CC[C@H]1N3C4=C(CCCCC4)C5=C3C=CC=C5	O=C1N(CC=C1)CC2=CC=CC=C2	5,6,7,8,9,10-hexahydrocyclohepta[b]indole	C12=CC=CC=C1C3=C(CCCCC3)N2	XXXI-R	O=P1(S)OC([C@@]([C@@]2=C(C(C)C)C=C(C(C)C)C=C2C(C)C)=C3)=[C@@]([C@@]4=C(C=CC=C5)C5=CC(C6=C(C(C)C)C=C(C(C)C)C=C6C(C)C)=C4O1)C7=C3C=CC=C7	2.01504	0.264135	0.936536	0.101918	0.0893145	0.0245637	0.344972	3.27778	21.6222
306	Adv. Synth. Catal. 2013, 355, 836-840	-93	1,2-dichloroethane	S02ad	Nua01	Faa04	P02adNua01	1	5	25	18	ClCCCl	O=C(CC1)N([C@@H]1C2=CNC3=CC=CC=C32)C4=CC=C(I)C=C4	O=C1N(C2=CC=C(I)C=C2)C(O)CC1	Indole	C12=CC=CC=C1C=CN2	III-R	O=P1(O)OC(C(C2=CC(C=CC=C3)=C3C4=C2C=CC=C4)=C5)=[C@@]([C@@]6=C(C=CC=C7)C7=CC(C8=C(C=CC=C9)C9=C(C=CC=C%10)C%10=C8)=C6O1)C%11=C5C=CC=C%11	3.41261	0.29396	1.61486	0.0874688	0.146649	0.0263459	0.119992	0	22.6971
307	Angew. Chem. Int. Ed. 2011, 50, 5682	-93	Toluene	S02he	Nua14	Fag01	P02adNua14	1	10	20	36	CC1=CC=CC=C1	O=C(N1CC2=CC=CC=C2)CC[C@H]1N3C(C)=CC4=C3C=CC=C4	O=C1N(CC=C1)CC2=CC=CC=C2	2-methyl-1H-indole	CC1=CC2=CC=CC=C2N1	XXXI-R	O=P1(S)OC([C@@]([C@@]2=C(C(C)C)C=C(C(C)C)C=C2C(C)C)=C3)=[C@@]([C@@]4=C(C=CC=C5)C5=CC(C6=C(C(C)C)C=C(C(C)C)C=C6C(C)C)=C4O1)C7=C3C=CC=C7	2.01504	0.264135	0.936536	0.101918	0.124478	0.0290906	0.18733	3.27778	21.6222
308	Angew. Chem. Int. Ed. 2011, 50, 5682	-93	Toluene	S02he	Nua14	Faa10	P02adNua14	1	5	20	36	CC1=CC=CC=C1	O=C(N1CC2=CC=CC=C2)CC[C@H]1N3C(C)=CC4=C3C=CC=C4	O=C1N(CC=C1)CC2=CC=CC=C2	2-methyl-1H-indole	CC1=CC2=CC=CC=C2N1	IV-R	O=P1(O)OC([C@@]([C@@]2=C(C(C)C)C=C(C(C)C)C=C2C(C)C)=C3)=[C@@]([C@@]4=C(C=CC=C5)C5=CC(C6=C(C(C)C)C=C(C(C)C)C=C6C(C)C)=C4O1)C7=C3C=CC=C7	2.01504	0.283503	0.957275	0.0843007	0.124478	0.0290906	0.18733	3.27778	21.6222
309	Angew. Chem. Int. Ed. 2011, 50, 5682	-93	Toluene	S02he	Nua16	Fag01	P02adNua16	1	10	20	36	CC1=CC=CC=C1	O=C(N1CC2=CC=CC=C2)CC[C@H]1N3C(CC)=C(C)C4=C3C=CC=C4	O=C1N(CC=C1)CC2=CC=CC=C2	2-ethyl-3-methyl-1H-indole	CC1=C(CC)NC2=CC=CC=C21	XXXI-R	O=P1(S)OC([C@@]([C@@]2=C(C(C)C)C=C(C(C)C)C=C2C(C)C)=C3)=[C@@]([C@@]4=C(C=CC=C5)C5=CC(C6=C(C(C)C)C=C(C(C)C)C=C6C(C)C)=C4O1)C7=C3C=CC=C7	2.01504	0.264135	0.936536	0.101918	0.104004	0.0266362	0.251865	3.27778	21.6222
310	Adv. Synth. Catal. 2013, 355, 836-840	-94	1,2-dichloroethane	S02ac	Nua07	Faa04	P02acNua07	1	5	25	18	ClCCCl	O=C(CC1)N([C@@H]1C2=CNC3=CC=C(Cl)C=C32)C4=CC=C(Br)C=C4	O=C1N(C2=CC=C(Br)C=C2)C(O)CC1	5-chloro-1H-indole	ClC1=CC=C(NC=C2)C2=C1	III-R	O=P1(O)OC(C(C2=CC(C=CC=C3)=C3C4=C2C=CC=C4)=C5)=[C@@]([C@@]6=C(C=CC=C7)C7=CC(C8=C(C=CC=C9)C9=C(C=CC=C%10)C%10=C8)=C6O1)C%11=C5C=CC=C%11	3.41261	0.29396	1.61486	0.0874688	0.275374	0.0264252	0.104981	0	21.9837
311	Adv. Synth. Catal. 2013, 355, 836-840	-94	1,2-dichloroethane	S02aa	Nua24	Faa04	P02aaNua24	1	5	25	18	ClCCCl	O=C(CC1)N([C@@H]1C2=CNC3=CC=C(OCC4=CC=CC=C4)C=C32)C5=CC=CC=C5	O=C1N(C2=CC=CC=C2)C(O)CC1	5-(benzyloxy)-1H-indole	C1(OCC2=CC=CC=C2)=CC=C(NC=C3)C3=C1	III-R	O=P1(O)OC(C(C2=CC(C=CC=C3)=C3C4=C2C=CC=C4)=C5)=[C@@]([C@@]6=C(C=CC=C7)C7=CC(C8=C(C=CC=C9)C9=C(C=CC=C%10)C%10=C8)=C6O1)C%11=C5C=CC=C%11	3.41261	0.29396	1.61486	0.0874688	0.179637	0.0262436	0.111282	0	21.3299
312	Angew. Chem. Int. Ed. 2011, 50, 5682	-94	Toluene	S02he	Nua15	Fag01	P02adNua15	1	10	20	36	CC1=CC=CC=C1	O=C(N1CC2=CC=CC=C2)CC[C@H]1N3C(C)=C(C)C4=C3C=CC=C4	O=C1N(CC=C1)CC2=CC=CC=C2	2,3-dimethyl-1H-indole	CC1=C(C)NC2=CC=CC=C21	XXXI-R	O=P1(S)OC([C@@]([C@@]2=C(C(C)C)C=C(C(C)C)C=C2C(C)C)=C3)=[C@@]([C@@]4=C(C=CC=C5)C5=CC(C6=C(C(C)C)C=C(C(C)C)C=C6C(C)C)=C4O1)C7=C3C=CC=C7	2.01504	0.264135	0.936536	0.101918	0.113324	0.0278094	0.202415	3.27778	21.6222
313	Adv. Synth. Catal. 2013, 355, 836-840	-95	1,2-dichloroethane	S02aa	Nua07	Faa04	P02aaNua07	1	5	25	18	ClCCCl	ClC1=CC=C(NC=C2[C@@H]3CCC(N3C4=CC=CC=C4)=O)C2=C1	O=C1N(C2=CC=CC=C2)C(O)CC1	5-chloro-1H-indole	ClC1=CC=C(NC=C2)C2=C1	III-R	O=P1(O)OC(C(C2=CC(C=CC=C3)=C3C4=C2C=CC=C4)=C5)=[C@@]([C@@]6=C(C=CC=C7)C7=CC(C8=C(C=CC=C9)C9=C(C=CC=C%10)C%10=C8)=C6O1)C%11=C5C=CC=C%11	3.41261	0.29396	1.61486	0.0874688	0.275374	0.0286117	0.117614	0	21.3299
314	Adv. Synth. Catal. 2013, 355, 836-840	-95	1,2-dichloroethane	S02aa	Nua01	Faa04	P02aaNua01	1	10	25	18	ClCCCl	O=C1CC[C@@H](C2=CNC3=C2C=CC=C3)N1C4=CC=CC=C4	O=C1N(C2=CC=CC=C2)C(O)CC1	Indole	C12=CC=CC=C1C=CN2	III-R	O=P1(O)OC(C(C2=CC(C=CC=C3)=C3C4=C2C=CC=C4)=C5)=[C@@]([C@@]6=C(C=CC=C7)C7=CC(C8=C(C=CC=C9)C9=C(C=CC=C%10)C%10=C8)=C6O1)C%11=C5C=CC=C%11	3.41261	0.29396	1.61486	0.0874688	0.146649	0.0304103	0.135072	0	21.3299
315	Adv. Synth. Catal. 2013, 355, 836-840	-95	1,2-dichloroethane	S02aa	Nua10	Faa04	P02aaNua10	1	5	25	18	ClCCCl	FC1=CC=C(NC=C2[C@@H]3CCC(N3C4=CC=CC=C4)=O)C2=C1	O=C1N(C2=CC=CC=C2)C(O)CC1	5-fluoro-1H-indole	FC1=CC=C(NC=C2)C2=C1	III-R	O=P1(O)OC(C(C2=CC(C=CC=C3)=C3C4=C2C=CC=C4)=C5)=[C@@]([C@@]6=C(C=CC=C7)C7=CC(C8=C(C=CC=C9)C9=C(C=CC=C%10)C%10=C8)=C6O1)C%11=C5C=CC=C%11	3.41261	0.29396	1.61486	0.0874688	0.321285	0.029927	0.118513	0	21.3299
316	Angew. Chem. Int. Ed. 2011, 50, 5682	-95	Toluene	S02he	Nua28	Fag01	P02adNua28	1	10	20	36	CC1=CC=CC=C1	O=C(N1CC2=CC=CC=C2)CC[C@H]1N3C4=C(CCCC4)C5=C3C=CC=C5	O=C1N(CC=C1)CC2=CC=CC=C2	2,3,4,9-tetrahydro-1H-carbazole	C12=CC=CC=C1C3=C(CCCC3)N2	XXXI-R	O=P1(S)OC([C@@]([C@@]2=C(C(C)C)C=C(C(C)C)C=C2C(C)C)=C3)=[C@@]([C@@]4=C(C=CC=C5)C5=CC(C6=C(C(C)C)C=C(C(C)C)C=C6C(C)C)=C4O1)C7=C3C=CC=C7	2.01504	0.264135	0.936536	0.101918	0.0961013	0.025558	0.30715	3.27778	21.6222
317	Adv. Synth. Catal. 2013, 355, 836-840	-97	1,2-dichloroethane	S02aa	Nua01	Faa04	P02aaNua01	1	10	25	18	ClCCCl	O=C1CC[C@@H](C2=CNC3=C2C=CC=C3)N1C4=CC=CC=C4	O=C1N(C2=CC=CC=C2)C(O)CC1	Indole	C12=CC=CC=C1C=CN2	III-R	O=P1(O)OC(C(C2=CC(C=CC=C3)=C3C4=C2C=CC=C4)=C5)=[C@@]([C@@]6=C(C=CC=C7)C7=CC(C8=C(C=CC=C9)C9=C(C=CC=C%10)C%10=C8)=C6O1)C%11=C5C=CC=C%11	3.41261	0.29396	1.61486	0.0874688	0.146649	0.0304103	0.135072	0	21.3299
318	Adv. Synth. Catal. 2013, 355, 836-840	-97	1,2-dichloroethane	S02aa	Nua03	Faa04	P02aaNua03	1	5	25	18	ClCCCl	O=C(CC1)N([C@@H]1C2=CNC3=CC=C(OC)C=C32)C4=CC=CC=C4	O=C1N(C2=CC=CC=C2)C(O)CC1	5-methoxy-1H-indole	COC1=CC=C(NC=C2)C2=C1	III-R	O=P1(O)OC(C(C2=CC(C=CC=C3)=C3C4=C2C=CC=C4)=C5)=[C@@]([C@@]6=C(C=CC=C7)C7=CC(C8=C(C=CC=C9)C9=C(C=CC=C%10)C%10=C8)=C6O1)C%11=C5C=CC=C%11	3.41261	0.29396	1.61486	0.0874688	0.296117	0.0351623	0.143579	0	21.3299
319	Adv. Synth. Catal. 2013, 355, 836-840	-97	1,2-dichloroethane	S02ac	Nua03	Faa04	P02acNua03	1	5	25	18	ClCCCl	O=C(CC1)N([C@@H]1C2=CNC3=CC=C(OC)C=C32)C4=CC=C(Br)C=C4	O=C1N(C2=CC=C(Br)C=C2)C(O)CC1	5-methoxy-1H-indole	COC1=CC=C(NC=C2)C2=C1	III-R	O=P1(O)OC(C(C2=CC(C=CC=C3)=C3C4=C2C=CC=C4)=C5)=[C@@]([C@@]6=C(C=CC=C7)C7=CC(C8=C(C=CC=C9)C9=C(C=CC=C%10)C%10=C8)=C6O1)C%11=C5C=CC=C%11	3.41261	0.29396	1.61486	0.0874688	0.296117	0.0325004	0.127706	0	21.9837
320	Adv. Synth. Catal. 2013, 355, 836-840	-97	1,2-dichloroethane	S02ad	Nua07	Faa04	P02adNua07	1	5	25	18	ClCCCl	O=C(CC1)N([C@@H]1C2=CNC3=CC=C(Cl)C=C32)C4=CC=C(I)C=C4	O=C1N(C2=CC=C(I)C=C2)C(O)CC1	5-chloro-1H-indole	ClC1=CC=C(NC=C2)C2=C1	III-R	O=P1(O)OC(C(C2=CC(C=CC=C3)=C3C4=C2C=CC=C4)=C5)=[C@@]([C@@]6=C(C=CC=C7)C7=CC(C8=C(C=CC=C9)C9=C(C=CC=C%10)C%10=C8)=C6O1)C%11=C5C=CC=C%11	3.41261	0.29396	1.61486	0.0874688	0.275374	0.0249853	0.106013	0	22.6971
321	Adv. Synth. Catal. 2013, 355, 836-840	-98	1,2-dichloroethane	S02aa	Nua01	Faa04	P02aaNua01	1	5	25	18	ClCCCl	O=C1CC[C@@H](C2=CNC3=C2C=CC=C3)N1C4=CC=CC=C4	O=C1N(C2=CC=CC=C2)C(O)CC1	Indole	C12=CC=CC=C1C=CN2	III-R	O=P1(O)OC(C(C2=CC(C=CC=C3)=C3C4=C2C=CC=C4)=C5)=[C@@]([C@@]6=C(C=CC=C7)C7=CC(C8=C(C=CC=C9)C9=C(C=CC=C%10)C%10=C8)=C6O1)C%11=C5C=CC=C%11	3.41261	0.29396	1.61486	0.0874688	0.146649	0.0304103	0.135072	0	21.3299
322	Adv. Synth. Catal. 2013, 355, 836-840	-98	1,2-dichloroethane	S02aa	Nua01	Faa04	P02aaNua01	1	10	25	18	ClCCCl	O=C1CC[C@@H](C2=CNC3=C2C=CC=C3)N1C4=CC=CC=C4	O=C1N(C2=CC=CC=C2)C(O)CC1	Indole	C12=CC=CC=C1C=CN2	III-R	O=P1(O)OC(C(C2=CC(C=CC=C3)=C3C4=C2C=CC=C4)=C5)=[C@@]([C@@]6=C(C=CC=C7)C7=CC(C8=C(C=CC=C9)C9=C(C=CC=C%10)C%10=C8)=C6O1)C%11=C5C=CC=C%11	3.41261	0.29396	1.61486	0.0874688	0.146649	0.0304103	0.135072	0	21.3299
323	Adv. Synth. Catal. 2013, 355, 836-840	-98	1,2-dichloroethane	S02aa	Nua06	Faa04	P02aaNua06	1	5	25	18	ClCCCl	O=C(CC1)N([C@@H]1C2=CNC3=CC(Cl)=CC=C32)C4=CC=CC=C4	O=C1N(C2=CC=CC=C2)C(O)CC1	6-chloro-1H-indole	ClC1=CC=C2C(NC=C2)=C1	III-R	O=P1(O)OC(C(C2=CC(C=CC=C3)=C3C4=C2C=CC=C4)=C5)=[C@@]([C@@]6=C(C=CC=C7)C7=CC(C8=C(C=CC=C9)C9=C(C=CC=C%10)C%10=C8)=C6O1)C%11=C5C=CC=C%11	3.41261	0.29396	1.61486	0.0874688	0.275374	0.0286117	0.117614	0	21.3299
324	Adv. Synth. Catal. 2013, 355, 836-840	-99	1,2-dichloroethane	S02aa	Nua22	Faa04	P02aaNua22	1	5	25	18	ClCCCl	O=C(CC1)N([C@@H]1C2=CNC3=C(OCC4=CC=CC=C4)C=CC=C32)C5=CC=CC=C5	O=C1N(C2=CC=CC=C2)C(O)CC1	7-(benzyloxy)-1H-indole	C1(OCC2=CC=CC=C2)=C(NC=C3)C3=CC=C1	III-R	O=P1(O)OC(C(C2=CC(C=CC=C3)=C3C4=C2C=CC=C4)=C5)=[C@@]([C@@]6=C(C=CC=C7)C7=CC(C8=C(C=CC=C9)C9=C(C=CC=C%10)C%10=C8)=C6O1)C%11=C5C=CC=C%11	3.41261	0.29396	1.61486	0.0874688	0.186797	0.0266291	0.111282	0	21.3299

## Sheet: Cat
Cat_Code_ref	SMILE cat	Zv_Cuns_Cat_Mean_ref	SAe_HetNoX_Cat_Mean_ref	aPolar_Cuns_Cat_Mean_ref	EA_HetNoX_Cat_Mean_ref
Fab03	O=P1(O)OC(C(C2=CC=CC=C2)=C3)=[C@@]([C@@]4=C(CCCC5)C5=CC(C6=CC=CC=C6)=C4O1)C7=C3CCCC7	2.22651	0.417002	1.09417	0.125071
Fba05	O=P1(O)OC2=[C@]([C@]3=C(C=CC=C4)C4=CC(C5=CC=C(C=CC=C6)C6=C5)=C3O1)C7=CC=CC=C7C=C2C8=CC(C=CC=C9)=C9C=C8	3.31315	0.344834	1.5884	0.102944
Fba11	O=P1(O)OC(C([Si](C2=CC=CC=C2)(C3=CC=CC=C3)C4=CC=CC=C4)=C5)=[C@]([C@]6=C(C=CC=C7)C7=CC([Si](C8=CC=CC=C8)(C9=CC=CC=C9)C%10=CC=CC=C%10)=C6O1)C%11=C5C=CC=C%11	3.25742	0.268405	1.38001	0.0908892
Faa06	O=P1(O)OC(C(C2=CC=CC=C2)=C3)=[C@@]([C@@]4=C(C=CC=C5)C5=CC(C6=CC=CC=C6)=C4O1)C7=C3C=CC=C7	3.17316	0.417002	1.55014	0.125071
Fba11	O=P1(O)OC2=[C@]([C@]3=C(C=CC=C4)C4=CC([Si](C5=CC=CC=C5)(C6=CC=CC=C6)C7=CC=CC=C7)=C3O1)C8=CC=CC=C8C=C2[Si](C9=CC=CC=C9)(C%10=CC=CC=C%10)C%11=CC=CC=C%11	3.25742	0.268405	1.38001	0.0908892
Faa14	O=P1(O)OC2=[C@]([C@]3=C(C=CC=C4)C4=CC(C5=CC=C(C6=CC=CC=C6)C=C5)=C3O1)C7=CC=CC=C7C=C2C8=CC=C(C9=CC=CC=C9)C=C8	3.36676	0.317371	1.60274	0.0945774
Fbb05	O=P1(OC(C(C2=CC3=C(C4=C2C=CC=C4)C=CC=C3)=CC5=C6CCCC5)=[C@@]6[C@]7=C8CCCCC8=CC(C9=CC%10=C(C%11=C9C=CC=C%11)C=CC=C%10)=C7O1)O	2.7401	0.29396	1.29951	0.0874688
Fba04	O=P1(OC(C(C2=CC3=C(C4=C2C=CC=C4)C=CC=C3)=CC5=C6C=CC=C5)=[C@]6[C@@]7=C8C=CC=CC8=CC(C9=C%10C=CC=CC%10=C%11C=CC=CC%11=C9)=C7O1)O	3.41261	0.29396	1.61486	0.0874688
Fab04	O=P1(O)OC(C(C2=CC=C(C=CC=C3)C3=C2)=C4)=[C@@]([C@@]5=C(CCCC6)C6=CC(C7=CC=C(C=CC=C8)C8=C7)=C5O1)C9=C4CCCC9	2.52678	0.344834	1.21556	0.102944
Faa10	O=P1(O)OC([C@@]([C@@]2=C(C(C)C)C=C(C(C)C)C=C2C(C)C)=C3)=[C@@]([C@@]4=C(C=CC=C5)C5=CC(C6=C(C(C)C)C=C(C(C)C)C=C6C(C)C)=C4O1)C7=C3C=CC=C7	2.01504	0.283503	0.957275	0.0843007
Faa07	O=P1(O)OC(C(C2=CC=CC=C2)=C3)=[C@]([C@]4=C(C=CC=C5)C5=CC(C6=CC=CC=C6)=C4O1)C7=C3C=CC=C7	3.17316	0.417002	1.55014	0.125071
Faa03	O=P1(O)OC(C(C2=C(C=CC=C3)C3=CC4=C2C=CC=C4)=C5)=[C@]([C@]6=C(C=CC=C7)C7=CC(C8=C(C=CC=C9)C9=CC%10=C8C=CC=C%10)=C6O1)C%11=C5C=CC=C%11	3.41261	0.29396	1.61486	0.0874688
Faa10	O=P1(O)OC(C(C2=C(C(C)C)C=C(C(C)C)C=C2C(C)C)=C3)=C(C4=C(C=CC=C5)C5=CC(C6=C(C(C)C)C=C(C(C)C)C=C6C(C)C)=C4O1)C7=C3C=CC=C7	2.01504	0.283503	0.957275	0.0843007
Fba13	O=P1(O)OC2=[C@@]([C@@]3=C(C=CC=C4)C4=CC(C5=CC=C(Cl)C=C5)=C3O1)C6=CC=CC=C6C=C2C7=CC=C(Cl)C=C7	2.84278	0.391107	1.42203	0.108407
Faa15	O=P1(O)OC(C(P(C2=CC=CC=C2)(C3=CC=CC=C3)=O)=C4)=[C@]([C@]5=C(C=CC=C6)C6=CC(P(C7=CC=CC=C7)(C8=CC=CC=C8)=O)=C5O1)C9=C4C=CC=C9	2.88578	0.444733	1.36331	0.130612
Faa18	O=P1(O)OC2=[C@@]([C@@]3=C(C=CC=C4)C4=CC(C5=CC=C(C(C)(C)C)C=C5)=C3O1)C6=CC=CC=C6C=C2C7=CC=C(C(C)(C)C)C=C7	2.56301	0.344834	1.23299	0.102944
Fab05	O=P1(O)OC(C(C2=CC(C=CC=C3)=C3C4=C2C=CC=C4)=C5)=[C@@]([C@@]6=C(CCCC7)C7=CC(C8=CC(C=CC=C9)=C9C%10=C8C=CC=C%10)=C6O1)C%11=C5CCCC%11	2.7401	0.29396	1.29951	0.0874688
Faa05	O=P1(O)OC(C(C2=CC=C(C=CC=C3)C3=C2)=C4)=[C@@]([C@@]5=C(C=CC=C6)C6=CC(C7=CC=C(C=CC=C8)C8=C7)=C5O1)C9=C4C=CC=C9	3.31315	0.344834	1.5884	0.102944
Fab06	O=P1(O)OC(C(C2=CC(C(F)(F)F)=CC(C(F)(F)F)=C2)=C3)=[C@@]([C@@]4=C(CCCC5)C5=CC(C6=CC(C(F)(F)F)=CC(C(F)(F)F)=C6)=C4O1)C7=C3CCCC7	1.25142	0.267093	0.840652	0.0633052
Fab01	O=P1(O)OC(C(C2=CC=C(Cl)C=C2)=C3)=[C@@]([C@@]4=C(CCCC5)C5=CC(C6=CC=C(Cl)C=C6)=C4O1)C7=C3CCCC7	1.97363	0.391107	0.995504	0.108407
Faa11	O=P1(O)OC(C([Si](C2=CC=CC=C2)(C3=CC=CC=C3)C4=CC=CC=C4)=C5)=C(C6=C(C=CC=C7)C7=CC([Si](C8=CC=CC=C8)(C9=CC=CC=C9)C%10=CC=CC=C%10)=C6O1)C%11=C5C=CC=C%11	3.25742	0.268405	1.38001	0.0908892
Faa16	O=P1(O)OC(C(C2=CC=C(C)C=C2)=C3)=[C@]([C@]4=C(C=CC=C5)C5=CC(C6=CC=C(C)C=C6)=C4O1)C7=C3C=CC=C7	2.96813	0.396269	1.44378	0.118693
Faa11	O=P1(O)OC(C([Si](C2=CC=CC=C2)(C3=CC=CC=C3)C4=CC=CC=C4)=C5)=[C@@]([C@@]6=C(C=CC=C7)C7=CC([Si](C8=CC=CC=C8)(C9=CC=CC=C9)C%10=CC=CC=C%10)=C6O1)C%11=C5C=CC=C%11	3.25742	0.268405	1.38001	0.0908892
Faa04	O=P1(O)OC(C(C2=CC(C=CC=C3)=C3C4=C2C=CC=C4)=C5)=[C@@]([C@@]6=C(C=CC=C7)C7=CC(C8=C(C=CC=C9)C9=C(C=CC=C%10)C%10=C8)=C6O1)C%11=C5C=CC=C%11	3.41261	0.29396	1.61486	0.0874688
Fba10	O=P1(O)OC2=[C@]([C@]3=C(C=CC=C4)C4=CC(C5=C(C(C)C)C=C(C(C)C)C=C5C(C)C)=C3O1)C6=CC=CC=C6C=C2C7=C(C(C)C)C=C(C(C)C)C=C7C(C)C	2.01504	0.283503	0.957275	0.0843007
Faa17	FC1=CC(C2=CC3=CC=CC=C3[C@]([C@]4=C(C=CC=C5)C5=CC(C6=CC(F)=CC(F)=C6)=C4O7)=C2OP7(O)=O)=CC(F)=C1	2.57047	0.361916	1.47785	0.0969992
Fba09	O=P1(O)OC2=[C@]([C@]3=C(C=CC=C4)C4=CC(C5=CC=CC6=C5C=CC=C6)=C3O1)C7=CC=CC=C7C=C2C8=CC=CC9=C8C=CC=C9	3.31315	0.344834	1.5884	0.102944
Faa12	O=P1(O)OC(C(C2=CC(C(F)(F)F)=CC(C(F)(F)F)=C2)=C3)=C(C4=C(C=CC=C5)C5=CC(C6=CC(C(F)(F)F)=CC(C(F)(F)F)=C6)=C4O1)C7=C3C=CC=C7	1.82972	0.267093	1.21505	0.0633052
Faa01	[H]C1=CC2=C([C@]([C@]3=C(C=CC=C4)C4=CC([H])=C3O5)=C1OP5(O)=O)C=CC=C2	2.80027	0.607811	1.44251	0.184585
Fae01	O=P1(O)OC2=[C@]([C@]3=C(C4=CC=CC=C4)C=C(C=CC5=C6C=CC=C5)C6=C3O1)C(C7=CC=CC=C7)=CC8=C2C(C=CC=C9)=C9C=C8	3.31416	0.344834	1.58861	0.102944
Faa02	O=P1(O)OC([C@@]([C@@]2=C(C=CC=C3)C3=CC4=C2C=CC=C4)=C5)=[C@@]([C@@]6=C(C=CC=C7)C7=CC(C8=C(C=CC=C9)C9=CC%10=C8C=CC=C%10)=C6O1)C%11=C5C=CC=C%11	3.41261	0.29396	1.61486	0.0874688
Faj01	O=P1(O)OC(C(COCC2=C(OP3(O)=O)C(C4=C(O3)C=CC5=C4C=CC=C5)=C(C=CC=C6)C6=C2)=C7)=[C@@]([C@@]8=C(C=CC=C9)C9=CC=C8O1)C%10=C7C=CC=C%10	2.58976	0.60565	1.35208	0.185824
Faa12	O=P1(O)OC(C(C2=CC(C(F)(F)F)=CC(C(F)(F)F)=C2)=C3)=[C@@]([C@@]4=C(C=CC=C5)C5=CC(C6=CC(C(F)(F)F)=CC(C(F)(F)F)=C6)=C4O1)C7=C3C=CC=C7	1.82972	0.267093	1.21505	0.0633052
Fba12	O=P1(O)OC2=[C@]([C@]3=C(C=CC=C4)C4=CC(C5=CC(C(F)(F)F)=CC(C(F)(F)F)=C5)=C3O1)C6=CC=CC=C6C=C2C7=CC(C(F)(F)F)=CC(C(F)(F)F)=C7	1.82972	0.267093	1.21505	0.0633052
Faa01	O=P1(O)OC(C=C2)=C(C3=C(C=CC=C4)C4=CC=C3O1)C5=C2C=CC=C5	2.80027	0.607811	1.44251	0.184585
Fac07	O=P1(NS(=O)(C(F)(F)F)=O)OC(C([Si](C2=CC=CC=C2)(C3=CC=CC=C3)C4=CC=CC=C4)=C5)=[C@]([C@]6=C(C=CC=C7)C7=CC([Si](C8=CC=CC=C8)(C9=CC=CC=C9)C%10=CC=CC=C%10)=C6O1)C%11=C5C=CC=C%11	2.80589	0.372455	1.28859	0.136625
Fba01	O=P1(O)OC(C=C2)=[C@]([C@]3=C(C=CC=C4)C4=CC=C3O1)C5=C2C=CC=C5	2.80027	0.607811	1.44251	0.184585
Fba10	O=P1(O)OC(C(C2=C(C(C)C)C=C(C(C)C)C=C2C(C)C)=C3)=[C@]([C@]4=C(C=CC=C5)C5=CC(C6=C(C(C)C)C=C(C(C)C)C=C6C(C)C)=C4O1)C7=C3C=CC=C7	2.01504	0.283503	0.957275	0.0843007
Fad03	O=P1(NS(=O)(C(F)(F)F)=O)OC(C(C2=CC(C=CC=C3)=C3C4=C2C=CC=C4)=C5)=[C@@]([C@@]6=C(CCCC7)C7=CC(C8=CC(C=CC=C9)=C9C%10=C8C=CC=C%10)=C6O1)C%11=C5CCCC%11	2.30252	0.410143	1.19195	0.140987
Faa14	O=P1(O)OC(C(C2=CC=C(C3=CC=CC=C3)C=C2)=C4)=[C@]([C@]5=C(C=CC=C6)C6=CC(C7=CC=C(C8=CC=CC=C8)C=C7)=C5O1)C9=C4C=CC=C9	3.36676	0.317371	1.60274	0.0945774
Fba05	O=P1(O)OC(C(C2=CC=C(C=CC=C3)C3=C2)=C4)=[C@]([C@]5=C(C=CC=C6)C6=CC(C7=CC=C(C=CC=C8)C8=C7)=C5O1)C9=C4C=CC=C9	3.31315	0.344834	1.5884	0.102944
Fad02	O=P1(NS(=O)(C(F)(F)F)=O)OC(C(C2=CC=C(C=CC=C3)C3=C2)=C4)=[C@@]([C@@]5=C(CCCC6)C6=CC(C7=CC=C(C=CC=C8)C8=C7)=C5O1)C9=C4CCCC9	2.06737	0.469635	1.09837	0.16072
Faa13	O=P1(O)OC(C(C2=CC=C(Cl)C=C2)=C3)=[C@]([C@]4=C(C=CC=C5)C5=CC(C6=CC=C(Cl)C=C6)=C4O1)C7=C3C=CC=C7	2.84278	0.391107	1.42203	0.108407
Faf01	O=P1(O)OC2=C(C3(C4=C(CC3)C=CC(C5=C(C=CC=C6)C6=CC=C5)=C4O1)CC7)C7=CC=C2C8=CC=CC9=C8C=CC=C9	2.70221	0.368767	1.30425	0.110259
Fab02	O=P1(O)OC(C([Si](C2=CC=CC=C2)(C3=CC=CC=C3)C4=CC=CC=C4)=C5)=[C@@]([C@@]6=C(CCCC7)C7=CC([Si](C8=CC=CC=C8)(C9=CC=CC=C9)C%10=CC=CC=C%10)=C6O1)C%11=C5CCCC%11	2.68798	0.268405	1.1324	0.0908892
Faa09	O=P1(O)OC(C(C2=CC=CC3=C2C=CC=C3)=C4)=[C@@]([C@@]5=C(C=CC=C6)C6=CC(C7=C(C=CC=C8)C8=CC=C7)=C5O1)C9=C4C=CC=C9	3.31315	0.344834	1.5884	0.102944
Fag01	O=P1(S)OC([C@@]([C@@]2=C(C(C)C)C=C(C(C)C)C=C2C(C)C)=C3)=[C@@]([C@@]4=C(C=CC=C5)C5=CC(C6=C(C(C)C)C=C(C(C)C)C=C6C(C)C)=C4O1)C7=C3C=CC=C7	2.01504	0.264135	0.936536	0.101918

## Sheet: Nuc
Nuc_code_ref	SMILE nuc	SAe_Het_Nuc_Mean_ref	Nuc_Name_ref
Nua01	C12=CC=CC=C1C=CN2	0.146649	Indole
Nua01	C1(C=CN2)=C2C=CC=C1	0.146649	Indole
Nua02	COC1=C(NC=C2)C2=CC=C1	0.307016	7-methoxy-1H-indole
Nua03	COC1=CC=C(NC=C2)C2=C1	0.296117	5-methoxy-1H-indole
Nua03	COC1=CC(C=CN2)=C2C=C1	0.296117	5-methoxiindole
Nua04	BrC(C=C1)=CC2=C1NC=C2	0.254958	5-bromoindole
Nua04	BrC1=CC=C(NC=C2)C2=C1	0.254958	5-bromo-1H-indole
Nua05	BrC1=C2C(NC=C2)=CC=C1	0.254958	4-bromo-1H-indole
Nua06	ClC1=CC=C2C(NC=C2)=C1	0.275374	6-chloro-1H-indole
Nua07	ClC1=CC=C(NC=C2)C2=C1	0.275374	5-chloro-1H-indole
Nua08	O=[N+](C(C=C1)=CC2=C1NC=C2)[O-]	0.96242	5-nitroindole
Nua08	O=[N+](C1=CC=C(NC=C2)C2=C1)[O-]	0.96242	5-nitro-1H-indole
Nua09	FC1=CC=C2C(NC=C2)=C1	0.321285	6-fluoro-1H-indole
Nua10	FC1=CC=C(NC=C2)C2=C1	0.321285	5-fluoro-1H-indole
Nua11	CC1=C(NC=C2)C2=CC=C1	0.132215	7-methyl-1H-indole
Nua12	CC1=CC=C(NC=C2)C2=C1	0.132215	5-methyl-1H-indole
Nua13	CC1=CNC2=CC=CC=C21	0.132215	3-methyl-1H-indole
Nua14	CC1=CC2=CC=CC=C2N1	0.124478	2-methyl-1H-indole
Nua15	CC1=C(C)NC2=CC=CC=C21	0.113324	2,3-dimethyl-1H-indole
Nua16	CC1=C(CC)NC2=CC=CC=C21	0.104004	2-ethyl-3-methyl-1H-indole
Nua17	CC1=C(CCCCC)C2=CC=CC=C2N1	0.0834231	2-methyl-3-pentyl-1H-indole
Nua18	BrCCC1=CNC2=CC=CC=C21	0.226608	3-(2-bromoethyl)-1H-indole
Nua19	CC1=C(C)NC2=CC=C(Cl)C=C21	0.224723	5-chloro-2,3-dimethyl-1H-indole
Nua20	C12=CC=CC=C1C=C(C3=CC=CC=C3)N2	0.0834231	2-phenyl-1H-indole
Nua21	CC1=CC=CC=C1C2=CC3=CC=CC=C3N2	0.0782607	2-o-tolyl-1H-indole
Nua22	C1(OCC2=CC=CC=C2)=C(NC=C3)C3=CC=C1	0.186797	7-(benzyloxy)-1H-indole
Nua23	C1(OCC2=CC=CC=C2)=CC=C3C(NC=C3)=C1	0.179637	6-(benzyloxy)-1H-indole
Nua24	C1(OCC2=CC=CC=C2)=CC=C(NC=C3)C3=C1	0.179637	5-(benzyloxy)-1H-indole
Nua25	C12=CC=CC(OCC3=CC=CC=C3)=C1C=CN2	0.179637	4-(benzyloxy)-1H-indole
Nua26	C12=CC=CC=C1C=CN2CC3=CC=CC=C3	0.0847467	1-benzyl-1H-indole
Nua27	C12=CC=CC=C1C3=C(CCC3)N2	0.104004	1,2,3,4-tetrahydrocyclopenta[b]indole
Nua28	C12=CC=CC=C1C3=C(CCCC3)N2	0.0961013	2,3,4,9-tetrahydro-1H-carbazole
Nua29	CC1=CC=C(NC2=C3CCCC2)C3=C1	0.0893145	6-methyl-2,3,4,9-tetrahydro-1H-carbazole
Nua30	ClC1=CC=C(NC2=C3CCCC2)C3=C1	0.193567	6-chloro-2,3,4,9-tetrahydro-1H-carbazole
Nua31	C12=CC=CC=C1C3=C(CCCCC3)N2	0.0893145	5,6,7,8,9,10-hexahydrocyclohepta[b]indole
Nua32	C12=CC=CC=C1C3=C(CCCCCC3)N2	0.0834231	6,7,8,9,10,11-hexahydro-5H-cycloocta[b]indole
Nua33	CN1C2=CC=CC=C2C=C1	0.148845	1-methyl-1H-indole
Nua33	CN1C=CC2=C1C=CC=C2	0.148845	N-methylindole
Nub01	C1=CNC=C1	0.275565	pyrrole
Nuc01	O=C(C1=C(C)NC(C)=C(C(OC(C)(C)C)=O)C1)OC(C)(C)C	0.388593	di-tert-butyl 2,6-dimethyl-1,4-dihydropyridine-3,5-dicarboxylate
Nuc02	O=C(C1=C(C)NC(C)=C(C(OCC)=O)C1)OCC	0.484828	Diethyl 1,4-dihydro-2,6-dimethyl-3,5-pyridinedicarboxylate
Nuc03	O=C(C1=C(C)NC(C)=C(C(OC(C)(C)C)=O)C1)OC(C)(C)C	0.388593	di-tert-butyl 2,6-dimethyl-1,4-dihydropyridine-3,5-dicarboxylate
Nuf01	C=C(C1=CC=CC=C1)NC(C)=O	0.278235	Enamide 1a
Nuf01	C=C(NC(C)=O)C1=CC=CC=C1	0.278235	enamide
Nuf02	C=C(NC(C1=CC=CC=C1)=O)C2=CC=CC=C2	0.198681	Enamide 1b
Nuf02	C=C(NC(C1=CC=CC=C1)=O)C2=CC=CC=C2	0.198681	Enamide 5d
Nuf03	C=C(NC(C1=CC=CC=C1)=O)C2=CC=C(Cl)C=C2	0.266734	Enamide 1c
Nuf04	C=C(NC(C1=CC=CC=C1)=O)C2=CC=C(C)C=C2	0.187934	Enamide 1d
Nuf07	C=C(NC(OC)=O)C1=CC=CC=C1	0.461744	Enamide 5a
Nuf08	C=C(NC(OCC)=O)C1=CC=CC=C1	0.413012	Enamide 5b
Nuf09	C=C(NC(OCC1=CC=CC=C1)=O)C2=CC=CC=C2	0.308792	Enamide 5c
Nuf10	C=C(NC(OCC1=CC=CC=C1)=O)C2=CC=C(C)C=C2	0.293957	Enamide 5e
Nuf11	C=C(NC(OCC1=CC=CC=C1)=O)C2=CC=C(Cl)C=C2	0.362722	Enamide 5f

## Sheet: Sol
Solvent	Smile Solvent	Zv_Cuns_Solv_Mean
1,2-dichloroethane	ClCCCl	0
Acetonitrile	N#CC	0.615385
Benzene	C1=CC=CC=C1	4
Benzonitrile	N#CC1=CC=CC=C1	3.23432
CH2CL2	ClCCl	0
CHCl3	ClC(Cl)Cl	0
Dioxane	C1COCCO1	0
DMF	[H]C(N(C)C)=O	0.295125
Et2O	CCOCC	0
Ethylacetate	CC(OCC)=O	0.258929
EtOAc	CC(OCC)=O	0.258929
EtOH	CCO	0
o-xylene	CC1=C(C)C=CC=C1	2.76157
Propanenitrile	CCC#N	0.418301
TBME	COC(C)(C)C	0
THF	C1CCCO1	0
Toluene	CC1=CC=CC=C1	3.27778

## Sheet: Sub
Subs_code	SMILE subs	Vvdw_All_Sub_Mean
S01aa	O=C1C2=CC=CC=C2C3(O)N1CCC4=CC(OC)=C(OC)C=C43	21.0388
S01ba	O=C1C2=CC=CC=C2C3(O)N1CCC4=CC(OC)=CC(OC)=C43	21.0429
S01ca	O=C1C2=CC=CC=C2C3(O)N1CCC4=CC(OC)=C(OC)C(OC)=C43	20.7628
S02aa	O=C1N(C2=CC=CC=C2)C(O)CC1	21.3299
S02ac	O=C1N(C2=CC=C(Br)C=C2)C(O)CC1	21.9837
S02ad	O=C1N(C2=CC=C(I)C=C2)C(O)CC1	22.6971
S02ae	O=C1N(CC2=CC=CC=C2)C(O)CC1	21.3918
S02he	O=C1N(CC=C1)CC2=CC=CC=C2	21.6222
S03aa	OC1NC(C2=CC=CC=C21)=O	21.273
S03ba	OC1(C)NC(C2=CC=CC=C21)=O	21.4103
S03ca	OC1(CC)NC(C2=CC=CC=C21)=O	21.5097
S03da	OC1(CCCC)NC(C2=CC=CC=C21)=O	21.6616
S03ea	OC1(CC=C)NC(C2=CC=CC=C21)=O	21.5996
S03fa	OC1(C2=CC=CC=C2)NC(C3=CC=CC=C31)=O	21.7688
S04aa	O=C(C1(C2=CNC3=C2C=CC=C3)O)N([H])C4=C1C=CC=C4	21.629
S04ab	O=C(C1(C2=CNC3=C2C=CC=C3)O)N(CC4=CC=CC=C4)C5=C1C=CC=C5	21.7938
S04ac	O=C(C1(C2=CNC3=C2C=CC=C3)O)N(C(OC(C)(C)C)=O)C4=C1C=CC=C4	21.3648
S04ad	O=C(C1(C2=CNC3=C2C=CC=C3)O)NC4=C1C=C(F)C=C4	21.4726
S04ae	O=C(C1(C2=CNC3=C2C=CC=C3)O)NC4=C1C=C(C)C=C4	21.6713
S04ba	O=C(C1(C2=CN(C)C3=C2C=CC=C3)O)NC4=C1C=CC=C4	21.5073
S04ca	O=C(C1(C2=CNC3=C2C=C(Br)C=C3)O)NC4=C1C=CC=C4	22.0371
S04da	O=C(C1(C2=CNC3=C2C=C(OC)C=C3)O)NC4=C1C=CC=C4	21.2625
S04ea	O=C(C1(C2=CNC3=C2C=C(Cl)C=C3)O)NC4=C1C=CC=C4	21.6713
S04fa	O=C(C1(C2=CNC3=C2C=CC(C)=C3)O)NC4=C1C=CC=C4	21.6732
S04fd	O=C(C1(C2=CNC3=C2C=CC(C)=C3)O)NC4=C1C=C(F)C=C4	21.5238
S04fe	O=C(C1(C2=CNC3=C2C=CC(C)=C3)O)NC4=C1C=C(C)C=C4	21.7112
S04ga	O=C(C1(C2=CNC3=C2C=C(F)C=C3)O)NC4=C1C=CC=C4	21.4726
S04ha	O=C(C1(C2=CNC3=C2C=CC(F)=C3)O)NC4=C1C=CC=C4	21.4731
S04hd	O=C(C1(C2=CNC3=C2C=C(F)C=C3)O)NC4=C1C=C(F)C=C4	21.323
S05aa	OC(C1=CC=CC=C1)C2=CNC3=C2C=CC=C3	21.9791
S05ab	OC(C1=CC=C(C)C=C1)C2=CNC3=C2C=CC=C3	22.0064
S05ac	OC(C1=CC=C(Cl)C=C1)C2=CNC3=C2C=CC=C3	22.0064
S05ad	OC(C1=CC=C(Br)C=C1)C2=CNC3=C2C=CC=C3	22.415
S05ae	OC(C1=CC=C(C#N)C=C1)C2=CNC3=C2C=CC=C3	21.8408
S05af	OC(C1=CC=C(C(F)(F)F)C=C1)C2=CNC3=C2C=CC=C3	21.4587
S05ag	OC(C1=CC(F)=CC=C1)C2=CNC3=C2C=CC=C3	21.7933
S05ah	OC(C1=CC([N+]([O-])=O)=CC=C1)C2=CNC3=C2C=CC=C3	21.3086
S05ai	OC(C1=CC(C#N)=CC=C1)C2=CNC3=C2C=CC=C3	21.8408
S05aj	OC(C1=CC(F)=C(F)C=C1)C2=CNC3=C2C=CC=C3	21.6133
S05ak	OC(C1=CC(Cl)=C(F)C=C1)C2=CNC3=C2C=CC=C3	21.8275
S05al	OC(C1=CC=C(C=CC=C2)C2=C1)C3=CNC4=C3C=CC=C4	22.0723
S05be	OC(C1=CC=C(C#N)C=C1)C2=CNC3=C2C=C(Cl)C=C3	21.873
S05ce	OC(C1=CC=C(C#N)C=C1)C2=CNC3=C2C=C(Br)C=C3	22.2445
S05de	OC(C1=CC=C(C#N)C=C1)C2=CNC3=C2C=C(C)C=C3	21.873
S05ee	OC(C1=CC=C(C#N)C=C1)C2=CNC3=C2C=C(OC)C=C3	21.4482
S06aa	O=C1C2=C(C=CC=C2)C(N1CC3)(O)C4=C3C5=C(N4)C=CC=C5	21.6508
S06ba	O=C1C2=C(C=CC=C2)C(N1CC3)(O)C4=C3C5=C(N4)C=CC=C5C	21.6893
S06ca	O=C1C2=C(C=CC=C2)C(N1CC3)(O)C4=C3C5=C(N4)C=CC(C)=C5	21.6881
S06da	O=C1C2=C(C=CC=C2)C(N1CC3)(O)C4=C3C5=C(N4)C=C(C)C=C5	21.6898
S06ea	O=C1C2=C(C=CC=C2)C(N1CC3)(O)C4=C3C5=C(N4)C(C)=CC=C5	21.6877
S06fa	O=C1C2=C(C=CC=C2)C(N1CC3)(O)C4=C3C5=C(N4)C=CC(OC)=C5	21.3163
S06ga	O=C1C2=C(C=CC=C2)C(N1CC3)(O)C4=C3C5=C(N4)C=CC(Cl)=C5	21.6881
S06ha	O=C1C2=C(C=CC=C2)C(N1CC3)(O)C4=C3C5=C(N4)C=CC(Br)=C5	22.0201
S06ia	O=C1C2=C(C=CC=C2)C(N1CC3)(O)C4=C3C5=C(N4)C=C(Br)C=C5	22.0229
S06ja	O=C1C2=C(C=CC=C2)C(N1CC3)(O)C4=C3C5=C(N4)C=CC(F)=C5	21.5091

## Sheet: Hoja1
Nuc_code_Ref	Nuc_Name	SMILE nuc
Nua27	1,2,3,4-tetrahydrocyclopenta[b]indole	C12=CC=CC=C1C3=C(CCC3)N2
Nua26	1-benzyl-1H-indole	C12=CC=CC=C1C=CN2CC3=CC=CC=C3
Nua33	1-methyl-1H-indole	CN1C2=CC=CC=C2C=C1
Nua28	2,3,4,9-tetrahydro-1H-carbazole	C12=CC=CC=C1C3=C(CCCC3)N2
Nua15	2,3-dimethyl-1H-indole	CC1=C(C)NC2=CC=CC=C21
Nua16	2-ethyl-3-methyl-1H-indole	CC1=C(CC)NC2=CC=CC=C21
Nua14	2-methyl-1H-indole	CC1=CC2=CC=CC=C2N1
Nua17	2-methyl-3-pentyl-1H-indole	CC1=C(CCCCC)C2=CC=CC=C2N1
Nua21	2-o-tolyl-1H-indole	CC1=CC=CC=C1C2=CC3=CC=CC=C3N2
Nua20	2-phenyl-1H-indole	C12=CC=CC=C1C=C(C3=CC=CC=C3)N2
Nua18	3-(2-bromoethyl)-1H-indole	BrCCC1=CNC2=CC=CC=C21
Nua13	3-methyl-1H-indole	CC1=CNC2=CC=CC=C21
Nua25	4-(benzyloxy)-1H-indole	C12=CC=CC(OCC3=CC=CC=C3)=C1C=CN2
Nua05	4-bromo-1H-indole	BrC1=C2C(NC=C2)=CC=C1
Nua24	5-(benzyloxy)-1H-indole	C1(OCC2=CC=CC=C2)=CC=C(NC=C3)C3=C1
Nua31	5,6,7,8,9,10-hexahydrocyclohepta[b]indole	C12=CC=CC=C1C3=C(CCCCC3)N2
Nua04	5-bromo-1H-indole	BrC1=CC=C(NC=C2)C2=C1
Nua04	5-bromoindole	BrC(C=C1)=CC2=C1NC=C2
Nua07	5-chloro-1H-indole	ClC1=CC=C(NC=C2)C2=C1
Nua19	5-chloro-2,3-dimethyl-1H-indole	CC1=C(C)NC2=CC=C(Cl)C=C21
Nua10	5-fluoro-1H-indole	FC1=CC=C(NC=C2)C2=C1
Nua03	5-methoxiindole	COC1=CC(C=CN2)=C2C=C1
Nua03	5-methoxy-1H-indole	COC1=CC=C(NC=C2)C2=C1
Nua12	5-methyl-1H-indole	CC1=CC=C(NC=C2)C2=C1
Nua08	5-nitro-1H-indole	O=[N+](C1=CC=C(NC=C2)C2=C1)[O-]
Nua08	5-nitroindole	O=[N+](C(C=C1)=CC2=C1NC=C2)[O-]
Nua23	6-(benzyloxy)-1H-indole	C1(OCC2=CC=CC=C2)=CC=C3C(NC=C3)=C1
Nua32	6,7,8,9,10,11-hexahydro-5H-cycloocta[b]indole	C12=CC=CC=C1C3=C(CCCCCC3)N2
Nua06	6-chloro-1H-indole	ClC1=CC=C2C(NC=C2)=C1
Nua30	6-chloro-2,3,4,9-tetrahydro-1H-carbazole	ClC1=CC=C(NC2=C3CCCC2)C3=C1
Nua09	6-fluoro-1H-indole	FC1=CC=C2C(NC=C2)=C1
Nua29	6-methyl-2,3,4,9-tetrahydro-1H-carbazole	CC1=CC=C(NC2=C3CCCC2)C3=C1
Nua22	7-(benzyloxy)-1H-indole	C1(OCC2=CC=CC=C2)=C(NC=C3)C3=CC=C1
Nua02	7-methoxy-1H-indole	COC1=C(NC=C2)C2=CC=C1
Nua11	7-methyl-1H-indole	CC1=C(NC=C2)C2=CC=C1
Nuc02	Diethyl 1,4-dihydro-2,6-dimethyl-3,5-pyridinedicarboxylate	O=C(C1=C(C)NC(C)=C(C(OCC)=O)C1)OCC
Nuc09	di-tert-butyl 2,6-dimethyl-1,4-dihydropyridine-3,5-dicarboxylate	O=C(C1=C(C)NC(C)=C(C(OC(C)(C)C)=O)C1)OC(C)(C)C
Nuf01	enamide	C=C(NC(C)=O)C1=CC=CC=C1
Nuf01	Enamide 1a	C=C(C1=CC=CC=C1)NC(C)=O
Nuf02	Enamide 1b	C=C(NC(C1=CC=CC=C1)=O)C2=CC=CC=C2
Nuf03	Enamide 1c	C=C(NC(C1=CC=CC=C1)=O)C2=CC=C(Cl)C=C2
Nuf04	Enamide 1d	C=C(NC(C1=CC=CC=C1)=O)C2=CC=C(C)C=C2
Nuf07	Enamide 5a	C=C(NC(OC)=O)C1=CC=CC=C1
Nuf08	Enamide 5b	C=C(NC(OCC)=O)C1=CC=CC=C1
Nuf09	Enamide 5c	C=C(NC(OCC1=CC=CC=C1)=O)C2=CC=CC=C2
Nuf02	Enamide 5d	C=C(NC(C1=CC=CC=C1)=O)C2=CC=CC=C2
Nuf10	Enamide 5e	C=C(NC(OCC1=CC=CC=C1)=O)C2=CC=C(C)C=C2
Nuf11	Enamide 5f	C=C(NC(OCC1=CC=CC=C1)=O)C2=CC=C(Cl)C=C2
Nua01	Indole	C12=CC=CC=C1C=CN2
Nua01	Indole	C1(C=CN2)=C2C=CC=C1
Nua33	N-methylindole	CN1C=CC2=C1C=CC=C2
Nub01	pyrrole	C1=CNC=C1
